# Supplementary material for: Microbial product translocation and mortality in adults hospitalised with HIV-associated tuberculosis: a prospective observational cohort study
Source: Research Square preprint supplement (doi:10.21203/rs.3.rs-9856875/v1), 2026-06-01
Supplement: Supplementary file 1 [file 186c3671d457c309808b1c86.xlsx]

## Sheet: fig3
earlydeaths	variable	value
Death	Flavobacterium	0.222181
Death	Flavobacterium	0.408573
Death	Flavobacterium	0.275934
Death	Flavobacterium	0.249812
Death	Flavobacterium	0.514778
Death	Flavobacterium	0.312941
Death	Flavobacterium	0.238095
Death	Flavobacterium	0.377214
Death	Flavobacterium	0.316291
Death	Flavobacterium	0.282204
Death	Flavobacterium	0.426683
Death	Flavobacterium	0.304319
Death	Flavobacterium	0.298399
Death	Flavobacterium	0.31321
Death	Flavobacterium	0.433913
Death	Flavobacterium	0.293762
Death	Flavobacterium	0.275353
Death	Flavobacterium	0.20324
Death	Flavobacterium	0.409906
Death	Flavobacterium	0.221712
Death	Flavobacterium	0.353544
Death	Flavobacterium	0.325282
Death	Flavobacterium	0.232009
Death	Flavobacterium	0.290015
Death	Flavobacterium	0.133152
Death	Flavobacterium	0.324317
Death	Flavobacterium	0.282586
Death	Flavobacterium	0.385179
Death	Flavobacterium	0.381286
Death	Flavobacterium	0.407922
Death	Flavobacterium	0.370748
Death	Flavobacterium	0.300683
Death	Flavobacterium	0.267231
Death	Flavobacterium	0.204775
Death	Flavobacterium	0.288101
Death	Flavobacterium	0.334272
Death	Flavobacterium	0.389959
Death	Flavobacterium	0.16919
Death	Flavobacterium	0.37119
Death	Flavobacterium	0.412366
Death	Flavobacterium	0.315441
Death	Flavobacterium	0.276657
Death	Flavobacterium	0.412932
Death	Flavobacterium	0.301673
Death	Flavobacterium	0.365198
Death	Flavobacterium	0.501349
Death	Flavobacterium	0.105713
Death	Flavobacterium	0.403552
Death	Flavobacterium	0.0836952
Death	Flavobacterium	0.259121
Death	Flavobacterium	0.463299
Death	Flavobacterium	0.385815
Death	Flavobacterium	0.372333
Death	Flavobacterium	0.0919833
Death	Flavobacterium	0.482526
Death	Flavobacterium	0.452772
Death	Flavobacterium	0.337009
Death	Flavobacterium	0.288082
Death	Flavobacterium	0.157
Death	Flavobacterium	0.307811
Death	Flavobacterium	0.301236
Death	Flavobacterium	0.243405
Death	Flavobacterium	0.431187
Death	Flavobacterium	0.404046
Death	Flavobacterium	0.213957
Death	Flavobacterium	0.101887
Death	Flavobacterium	0.201906
Death	Flavobacterium	0.146137
Death	Flavobacterium	0.309735
Death	Flavobacterium	0.0979444
Death	Flavobacterium	0.411655
Death	Flavobacterium	0.255727
Death	Flavobacterium	0.212695
Death	Flavobacterium	0.167105
Death	Flavobacterium	0.122716
Death	Flavobacterium	0.333075
Death	Flavobacterium	0.278958
Death	Flavobacterium	0.378919
Death	Flavobacterium	0.449363
Death	Flavobacterium	0.31054
Death	Flavobacterium	0.305799
Death	Flavobacterium	0.345455
Death	Flavobacterium	0.283982
Death	Flavobacterium	0.413015
Death	Flavobacterium	0.325542
Death	Flavobacterium	0.286326
Death	Flavobacterium	0.467748
Death	Flavobacterium	0.416949
Death	Flavobacterium	0.277708
Death	Flavobacterium	0.43759
Death	Flavobacterium	0.192581
Death	Flavobacterium	0.264254
Death	Flavobacterium	0.339557
Death	Flavobacterium	0.422347
Death	Flavobacterium	0.309773
Death	Flavobacterium	0.0540402
Death	Flavobacterium	0.283344
Death	Flavobacterium	0.356542
Death	Flavobacterium	0.354728
Death	Flavobacterium	0.118102
Death	Flavobacterium	0.192969
Death	Flavobacterium	0.259305
Death	Flavobacterium	0.280728
Death	Flavobacterium	0.331525
Death	Flavobacterium	0.329137
Death	Flavobacterium	0.198091
Death	Flavobacterium	0.371448
Death	Flavobacterium	0.347778
Death	Flavobacterium	0.38701
Death	Flavobacterium	0.39934
Death	Flavobacterium	0.479748
Death	Pseudomonas	0.123325
Death	Pseudomonas	0.107222
Death	Pseudomonas	0.0388209
Death	Pseudomonas	0.16012
Death	Pseudomonas	0.0651341
Death	Pseudomonas	0.0723529
Death	Pseudomonas	0.0726877
Death	Pseudomonas	0.210571
Death	Pseudomonas	0.140088
Death	Pseudomonas	0.0549382
Death	Pseudomonas	0.0890373
Death	Pseudomonas	0.197775
Death	Pseudomonas	0.169408
Death	Pseudomonas	0.0817693
Death	Pseudomonas	0.196786
Death	Pseudomonas	0.247362
Death	Pseudomonas	0.134815
Death	Pseudomonas	0.0797148
Death	Pseudomonas	0.180575
Death	Pseudomonas	0.252255
Death	Pseudomonas	0.129263
Death	Pseudomonas	0.161271
Death	Pseudomonas	0.200874
Death	Pseudomonas	0.0963691
Death	Pseudomonas	0.245836
Death	Pseudomonas	0.2354
Death	Pseudomonas	0.165827
Death	Pseudomonas	0.0762758
Death	Pseudomonas	0.110218
Death	Pseudomonas	0.121319
Death	Pseudomonas	0.205309
Death	Pseudomonas	0.162249
Death	Pseudomonas	0.0867752
Death	Pseudomonas	0.105758
Death	Pseudomonas	0.159404
Death	Pseudomonas	0.0521279
Death	Pseudomonas	0.131048
Death	Pseudomonas	0.0140539
Death	Pseudomonas	0.121816
Death	Pseudomonas	0.0811097
Death	Pseudomonas	0.0566014
Death	Pseudomonas	0.212456
Death	Pseudomonas	0.166054
Death	Pseudomonas	0.022896
Death	Pseudomonas	0.0391384
Death	Pseudomonas	0.174206
Death	Pseudomonas	0.05534
Death	Pseudomonas	0.10594
Death	Pseudomonas	0.0137644
Death	Pseudomonas	0.0259588
Death	Pseudomonas	0.0959988
Death	Pseudomonas	0.117815
Death	Pseudomonas	0.110697
Death	Pseudomonas	0.0177676
Death	Pseudomonas	0.040029
Death	Pseudomonas	0.105484
Death	Pseudomonas	0.177736
Death	Pseudomonas	0.200387
Death	Pseudomonas	0.111203
Death	Pseudomonas	0.179922
Death	Pseudomonas	0.020664
Death	Pseudomonas	0.0100989
Death	Pseudomonas	0.0367767
Death	Pseudomonas	0.0988622
Death	Pseudomonas	0.1008
Death	Pseudomonas	0.0276201
Death	Pseudomonas	0.25603
Death	Pseudomonas	0.17851
Death	Pseudomonas	0.20472
Death	Pseudomonas	0.252318
Death	Pseudomonas	0.167177
Death	Pseudomonas	0.205793
Death	Pseudomonas	0.0252525
Death	Pseudomonas	0.255777
Death	Pseudomonas	0.0501938
Death	Pseudomonas	0.0989139
Death	Pseudomonas	0.109513
Death	Pseudomonas	0.087837
Death	Pseudomonas	0.187833
Death	Pseudomonas	0.118253
Death	Pseudomonas	0.134517
Death	Pseudomonas	0.149569
Death	Pseudomonas	0.087146
Death	Pseudomonas	0.190614
Death	Pseudomonas	0.224117
Death	Pseudomonas	0.0771898
Death	Pseudomonas	0.0191739
Death	Pseudomonas	0.0132025
Death	Pseudomonas	0.244675
Death	Pseudomonas	0.125968
Death	Pseudomonas	0.20955
Death	Pseudomonas	0.0638955
Death	Pseudomonas	0.0455517
Death	Pseudomonas	0.0682972
Death	Pseudomonas	0.229512
Death	Pseudomonas	0.0994994
Death	Pseudomonas	0.0593491
Death	Pseudomonas	0.0979266
Death	Pseudomonas	0.168871
Death	Pseudomonas	0.0379712
Death	Pseudomonas	0.02627
Death	Pseudomonas	0.0995228
Death	Pseudomonas	0.199639
Death	Pseudomonas	0.189003
Death	Pseudomonas	0.0221217
Death	Pseudomonas	0.152591
Death	Pseudomonas	0.0627316
Death	Pseudomonas	0.0134095
Death	Pseudomonas	0.031136
Death	Pseudomonas	0.0969355
Death	Pseudomonas	0.0408041
Death	Candidatus_Aquiluna	0.0268044
Death	Candidatus_Aquiluna	0.0385372
Death	Candidatus_Aquiluna	0.0106314
Death	Candidatus_Aquiluna	0.0302483
Death	Candidatus_Aquiluna	0.059387
Death	Candidatus_Aquiluna	0.0717647
Death	Candidatus_Aquiluna	0.0421245
Death	Candidatus_Aquiluna	0.100184
Death	Candidatus_Aquiluna	0.0461226
Death	Candidatus_Aquiluna	0.0342777
Death	Candidatus_Aquiluna	0.00709516
Death	Candidatus_Aquiluna	0.0339005
Death	Candidatus_Aquiluna	0.0154701
Death	Candidatus_Aquiluna	0.0462642
Death	Candidatus_Aquiluna	0.0267847
Death	Candidatus_Aquiluna	0.0650217
Death	Candidatus_Aquiluna	0.0553633
Death	Candidatus_Aquiluna	0.008814
Death	Candidatus_Aquiluna	0.0203792
Death	Candidatus_Aquiluna	0.0083874
Death	Candidatus_Aquiluna	0.0731228
Death	Candidatus_Aquiluna	0.018979
Death	Candidatus_Aquiluna	0.0406937
Death	Candidatus_Aquiluna	0.0573374
Death	Candidatus_Aquiluna	0.0101252
Death	Candidatus_Aquiluna	0.0359273
Death	Candidatus_Aquiluna	0.00152243
Death	Candidatus_Aquiluna	0
Death	Candidatus_Aquiluna	0
Death	Candidatus_Aquiluna	0.0453131
Death	Candidatus_Aquiluna	0.0810401
Death	Candidatus_Aquiluna	0.017602
Death	Candidatus_Aquiluna	0.0513355
Death	Candidatus_Aquiluna	0.0492978
Death	Candidatus_Aquiluna	0.000338677
Death	Candidatus_Aquiluna	0.0667642
Death	Candidatus_Aquiluna	0.0495981
Death	Candidatus_Aquiluna	0.00861365
Death	Candidatus_Aquiluna	0.0470772
Death	Candidatus_Aquiluna	0.0243329
Death	Candidatus_Aquiluna	0.0220046
Death	Candidatus_Aquiluna	0.00128082
Death	Candidatus_Aquiluna	0.0207201
Death	Candidatus_Aquiluna	0.0232734
Death	Candidatus_Aquiluna	0.000281571
Death	Candidatus_Aquiluna	0.000311268
Death	Candidatus_Aquiluna	0.00931388
Death	Candidatus_Aquiluna	0.0885487
Death	Candidatus_Aquiluna	0.00692841
Death	Candidatus_Aquiluna	0.0258419
Death	Candidatus_Aquiluna	0.0358377
Death	Candidatus_Aquiluna	0.00023801
Death	Candidatus_Aquiluna	0.0574252
Death	Candidatus_Aquiluna	0.00841622
Death	Candidatus_Aquiluna	0
Death	Candidatus_Aquiluna	0.0950679
Death	Candidatus_Aquiluna	0.100159
Death	Candidatus_Aquiluna	0.0330065
Death	Candidatus_Aquiluna	0.00603318
Death	Candidatus_Aquiluna	0.000355577
Death	Candidatus_Aquiluna	0.0217649
Death	Candidatus_Aquiluna	0.110676
Death	Candidatus_Aquiluna	0.0279503
Death	Candidatus_Aquiluna	0
Death	Candidatus_Aquiluna	0.0136903
Death	Candidatus_Aquiluna	0.000767224
Death	Candidatus_Aquiluna	0.0229439
Death	Candidatus_Aquiluna	0.0452302
Death	Candidatus_Aquiluna	0.0333333
Death	Candidatus_Aquiluna	0.0608626
Death	Candidatus_Aquiluna	0.097201
Death	Candidatus_Aquiluna	0.0253303
Death	Candidatus_Aquiluna	0.013315
Death	Candidatus_Aquiluna	0.0242345
Death	Candidatus_Aquiluna	0.0555453
Death	Candidatus_Aquiluna	0
Death	Candidatus_Aquiluna	0.047837
Death	Candidatus_Aquiluna	0.0201293
Death	Candidatus_Aquiluna	0.0158749
Death	Candidatus_Aquiluna	0.0411171
Death	Candidatus_Aquiluna	0.0363794
Death	Candidatus_Aquiluna	0.088134
Death	Candidatus_Aquiluna	0.0410154
Death	Candidatus_Aquiluna	0.0613187
Death	Candidatus_Aquiluna	0.000601926
Death	Candidatus_Aquiluna	0.0316101
Death	Candidatus_Aquiluna	0.0759853
Death	Candidatus_Aquiluna	0.00178412
Death	Candidatus_Aquiluna	0.000227816
Death	Candidatus_Aquiluna	0.0766141
Death	Candidatus_Aquiluna	0.0035517
Death	Candidatus_Aquiluna	0.108951
Death	Candidatus_Aquiluna	0.0176583
Death	Candidatus_Aquiluna	0.0220529
Death	Candidatus_Aquiluna	0.000789088
Death	Candidatus_Aquiluna	0
Death	Candidatus_Aquiluna	0.0617741
Death	Candidatus_Aquiluna	0.0210143
Death	Candidatus_Aquiluna	0.0393598
Death	Candidatus_Aquiluna	0.00482608
Death	Candidatus_Aquiluna	0.00849913
Death	Candidatus_Aquiluna	0.0283572
Death	Candidatus_Aquiluna	0.0500978
Death	Candidatus_Aquiluna	0.00058651
Death	Candidatus_Aquiluna	0.0603764
Death	Candidatus_Aquiluna	0.0339585
Death	Candidatus_Aquiluna	0.0741249
Death	Candidatus_Aquiluna	0
Death	Candidatus_Aquiluna	0.0830698
Death	Candidatus_Aquiluna	0.0440519
Death	Candidatus_Aquiluna	0.060006
Death	Fluviicola	0
Death	Fluviicola	0
Death	Fluviicola	0.0599227
Death	Fluviicola	0.0189616
Death	Fluviicola	0.0235359
Death	Fluviicola	0.0323529
Death	Fluviicola	0.0401786
Death	Fluviicola	0.0277738
Death	Fluviicola	0.0314259
Death	Fluviicola	0.0154954
Death	Fluviicola	0.0549527
Death	Fluviicola	0
Death	Fluviicola	0.0223336
Death	Fluviicola	0.014465
Death	Fluviicola	0.000327976
Death	Fluviicola	0.058504
Death	Fluviicola	0.00998137
Death	Fluviicola	0.0368114
Death	Fluviicola	0.0296659
Death	Fluviicola	0
Death	Fluviicola	0.0353684
Death	Fluviicola	0.0269969
Death	Fluviicola	0.0185716
Death	Fluviicola	0.0402421
Death	Fluviicola	0.0225367
Death	Fluviicola	0.0280205
Death	Fluviicola	0.0374751
Death	Fluviicola	0.0358306
Death	Fluviicola	0
Death	Fluviicola	0.0388843
Death	Fluviicola	0.0294691
Death	Fluviicola	0
Death	Fluviicola	0.0239739
Death	Fluviicola	0.0570225
Death	Fluviicola	0.0219011
Death	Fluviicola	0.0120468
Death	Fluviicola	0.00242682
Death	Fluviicola	0.0226675
Death	Fluviicola	0.000208768
Death	Fluviicola	0.0409075
Death	Fluviicola	0.030781
Death	Fluviicola	0.000800512
Death	Fluviicola	0.0289493
Death	Fluviicola	0.00176123
Death	Fluviicola	0.0380121
Death	Fluviicola	0.0513592
Death	Fluviicola	0.0113319
Death	Fluviicola	0.0745867
Death	Fluviicola	0.0086836
Death	Fluviicola	0.0416277
Death	Fluviicola	0.0185665
Death	Fluviicola	0.0397477
Death	Fluviicola	0.0379493
Death	Fluviicola	0.00306044
Death	Fluviicola	0.00839988
Death	Fluviicola	0.00939447
Death	Fluviicola	0
Death	Fluviicola	0.0436404
Death	Fluviicola	0.0164541
Death	Fluviicola	0.12303
Death	Fluviicola	0.0287093
Death	Fluviicola	0.0385408
Death	Fluviicola	0.0305655
Death	Fluviicola	0.0331226
Death	Fluviicola	0
Death	Fluviicola	0.00276201
Death	Fluviicola	0.0209436
Death	Fluviicola	0.0369648
Death	Fluviicola	0
Death	Fluviicola	0.0284831
Death	Fluviicola	0.0670238
Death	Fluviicola	0
Death	Fluviicola	0.000459137
Death	Fluviicola	0.0255495
Death	Fluviicola	0.000553608
Death	Fluviicola	0
Death	Fluviicola	0.0212488
Death	Fluviicola	0.0459924
Death	Fluviicola	0.00023175
Death	Fluviicola	0.0580738
Death	Fluviicola	0.0611792
Death	Fluviicola	0.0286124
Death	Fluviicola	0.0129772
Death	Fluviicola	0
Death	Fluviicola	0.0802568
Death	Fluviicola	0.0183542
Death	Fluviicola	0.0234347
Death	Fluviicola	0.00231936
Death	Fluviicola	0
Death	Fluviicola	0.064132
Death	Fluviicola	0
Death	Fluviicola	0
Death	Fluviicola	0.0280058
Death	Fluviicola	0.0261962
Death	Fluviicola	0.0143163
Death	Fluviicola	0.000919399
Death	Fluviicola	0.0469687
Death	Fluviicola	0.0301205
Death	Fluviicola	0.0205781
Death	Fluviicola	0.0169368
Death	Fluviicola	0.0200889
Death	Fluviicola	0.0853442
Death	Fluviicola	0
Death	Fluviicola	0.000146628
Death	Fluviicola	0.0392325
Death	Fluviicola	0.000332926
Death	Fluviicola	0.039396
Death	Fluviicola	0.0300472
Death	Fluviicola	0.0195816
Death	Fluviicola	0
Death	Fluviicola	0.0369037
Death	Cutibacterium	0.000491823
Death	Cutibacterium	0
Death	Cutibacterium	0
Death	Cutibacterium	0.0102333
Death	Cutibacterium	0.0103996
Death	Cutibacterium	0.0358824
Death	Cutibacterium	0.0128205
Death	Cutibacterium	0.00595154
Death	Cutibacterium	0.0173546
Death	Cutibacterium	0
Death	Cutibacterium	0.00139121
Death	Cutibacterium	0.0564136
Death	Cutibacterium	0.0153612
Death	Cutibacterium	0.0240287
Death	Cutibacterium	0
Death	Cutibacterium	0
Death	Cutibacterium	0
Death	Cutibacterium	0
Death	Cutibacterium	0
Death	Cutibacterium	0
Death	Cutibacterium	0.000842105
Death	Cutibacterium	0.0269969
Death	Cutibacterium	0
Death	Cutibacterium	0.00181543
Death	Cutibacterium	0.191072
Death	Cutibacterium	0.0044389
Death	Cutibacterium	0.130109
Death	Cutibacterium	0.0127579
Death	Cutibacterium	0.010333
Death	Cutibacterium	0.0797387
Death	Cutibacterium	0.0084507
Death	Cutibacterium	0.0256782
Death	Cutibacterium	0.067101
Death	Cutibacterium	0.0265449
Death	Cutibacterium	0.0228042
Death	Cutibacterium	0.00866922
Death	Cutibacterium	0.000303352
Death	Cutibacterium	0.0118778
Death	Cutibacterium	0.00553236
Death	Cutibacterium	0.0021159
Death	Cutibacterium	0.0043246
Death	Cutibacterium	0.0550752
Death	Cutibacterium	0.000734754
Death	Cutibacterium	0.000754812
Death	Cutibacterium	0.003942
Death	Cutibacterium	0
Death	Cutibacterium	0
Death	Cutibacterium	0
Death	Cutibacterium	0.000923788
Death	Cutibacterium	0.000350795
Death	Cutibacterium	0
Death	Cutibacterium	0.0185648
Death	Cutibacterium	0.0113132
Death	Cutibacterium	0
Death	Cutibacterium	0.000207404
Death	Cutibacterium	0.00132748
Death	Cutibacterium	0.0818278
Death	Cutibacterium	0
Death	Cutibacterium	0.0185109
Death	Cutibacterium	0.0414839
Death	Cutibacterium	0.00101626
Death	Cutibacterium	0.0404988
Death	Cutibacterium	0
Death	Cutibacterium	0
Death	Cutibacterium	0.11558
Death	Cutibacterium	0.000613779
Death	Cutibacterium	0.2525
Death	Cutibacterium	0.217541
Death	Cutibacterium	0.086529
Death	Cutibacterium	0.0188096
Death	Cutibacterium	0.0177127
Death	Cutibacterium	0.019028
Death	Cutibacterium	0.00378788
Death	Cutibacterium	0.00309976
Death	Cutibacterium	0.0105185
Death	Cutibacterium	0.0570209
Death	Cutibacterium	0.0480549
Death	Cutibacterium	0.0201293
Death	Cutibacterium	0.0378911
Death	Cutibacterium	0.0165134
Death	Cutibacterium	0.0230628
Death	Cutibacterium	0.00861244
Death	Cutibacterium	0.0023681
Death	Cutibacterium	0.0147122
Death	Cutibacterium	0.000200642
Death	Cutibacterium	0
Death	Cutibacterium	0.00426086
Death	Cutibacterium	0.000981267
Death	Cutibacterium	0.00159471
Death	Cutibacterium	0.000430416
Death	Cutibacterium	0.0149961
Death	Cutibacterium	0.0227273
Death	Cutibacterium	0.0809808
Death	Cutibacterium	0
Death	Cutibacterium	0.000901815
Death	Cutibacterium	0.108387
Death	Cutibacterium	0.00229738
Death	Cutibacterium	0.0194732
Death	Cutibacterium	0
Death	Cutibacterium	0
Death	Cutibacterium	0.000772648
Death	Cutibacterium	0.000272665
Death	Cutibacterium	0.00165488
Death	Cutibacterium	0.0325513
Death	Cutibacterium	0.00403324
Death	Cutibacterium	0
Death	Cutibacterium	0.0144132
Death	Cutibacterium	0
Death	Cutibacterium	0.0004865
Death	Cutibacterium	0.000425622
Death	Cutibacterium	0.0330033
Death	Comamonas	0.0108201
Death	Comamonas	0.0230699
Death	Comamonas	0.00692655
Death	Comamonas	0.0100828
Death	Comamonas	0.0240832
Death	Comamonas	0.0626471
Death	Comamonas	0.0209478
Death	Comamonas	0.0556894
Death	Comamonas	0.0247029
Death	Comamonas	0.00719987
Death	Comamonas	0.0293545
Death	Comamonas	0
Death	Comamonas	0.0102408
Death	Comamonas	0.0255828
Death	Comamonas	0.0197879
Death	Comamonas	0.0321229
Death	Comamonas	0
Death	Comamonas	0.00466623
Death	Comamonas	0.00644912
Death	Comamonas	0
Death	Comamonas	0.0468772
Death	Comamonas	0.0195879
Death	Comamonas	0.0185716
Death	Comamonas	0.0314675
Death	Comamonas	0
Death	Comamonas	0.0263559
Death	Comamonas	0.0329078
Death	Comamonas	0.0897123
Death	Comamonas	0.00665901
Death	Comamonas	0.0485276
Death	Comamonas	0.0345612
Death	Comamonas	0.0386208
Death	Comamonas	0.0166775
Death	Comamonas	0.0205056
Death	Comamonas	0.0145631
Death	Comamonas	0.00923215
Death	Comamonas	0.0606704
Death	Comamonas	0.00027201
Death	Comamonas	0.0356994
Death	Comamonas	0
Death	Comamonas	0.0464258
Death	Comamonas	0.000800512
Death	Comamonas	0.0155768
Death	Comamonas	0.00792553
Death	Comamonas	0.0218218
Death	Comamonas	0.0179498
Death	Comamonas	0.00752872
Death	Comamonas	0.0383344
Death	Comamonas	0.000646651
Death	Comamonas	0.00760056
Death	Comamonas	0.0251871
Death	Comamonas	0.0315364
Death	Comamonas	0.0476872
Death	Comamonas	0.00450565
Death	Comamonas	0
Death	Comamonas	0.019708
Death	Comamonas	0
Death	Comamonas	0.00662892
Death	Comamonas	0
Death	Comamonas	0.0501363
Death	Comamonas	0.0569106
Death	Comamonas	0.0646125
Death	Comamonas	0.000326904
Death	Comamonas	0.0261694
Death	Comamonas	0
Death	Comamonas	0.0204082
Death	Comamonas	0.0174138
Death	Comamonas	0.00929859
Death	Comamonas	0
Death	Comamonas	0.0185409
Death	Comamonas	0.0358627
Death	Comamonas	0.0332081
Death	Comamonas	0.0374197
Death	Comamonas	0.00695097
Death	Comamonas	0.000369072
Death	Comamonas	0
Death	Comamonas	0.0301842
Death	Comamonas	0.0337929
Death	Comamonas	0.0115875
Death	Comamonas	0.000332484
Death	Comamonas	0
Death	Comamonas	0.0138756
Death	Comamonas	0.0345742
Death	Comamonas	0.029854
Death	Comamonas	0
Death	Comamonas	0.0152952
Death	Comamonas	0.0129009
Death	Comamonas	0
Death	Comamonas	0
Death	Comamonas	0
Death	Comamonas	0.00394633
Death	Comamonas	0.0226276
Death	Comamonas	0.0210325
Death	Comamonas	0.0215183
Death	Comamonas	0.0409199
Death	Comamonas	0
Death	Comamonas	0.00153159
Death	Comamonas	0.0459512
Death	Comamonas	0.000816593
Death	Comamonas	0.0139319
Death	Comamonas	0
Death	Comamonas	0.0481254
Death	Comamonas	0.032195
Death	Comamonas	0.00131965
Death	Comamonas	0
Death	Comamonas	0.022639
Death	Comamonas	0.0410432
Death	Comamonas	0.062081
Death	Comamonas	0.0310144
Death	Comamonas	0
Death	Comamonas	0.0226523
Death	Acinetobacter	0.000983647
Death	Acinetobacter	0
Death	Acinetobacter	0.00789304
Death	Acinetobacter	0.0267871
Death	Acinetobacter	0.00492611
Death	Acinetobacter	0.0144118
Death	Acinetobacter	0.0224359
Death	Acinetobacter	0
Death	Acinetobacter	0.0236085
Death	Acinetobacter	0
Death	Acinetobacter	0
Death	Acinetobacter	0
Death	Acinetobacter	0
Death	Acinetobacter	0
Death	Acinetobacter	0
Death	Acinetobacter	0
Death	Acinetobacter	0.000665425
Death	Acinetobacter	0
Death	Acinetobacter	0.0647491
Death	Acinetobacter	0
Death	Acinetobacter	0
Death	Acinetobacter	0
Death	Acinetobacter	0
Death	Acinetobacter	0
Death	Acinetobacter	0
Death	Acinetobacter	0
Death	Acinetobacter	0.0477808
Death	Acinetobacter	0
Death	Acinetobacter	0
Death	Acinetobacter	0
Death	Acinetobacter	0
Death	Acinetobacter	0.0594326
Death	Acinetobacter	0.0122476
Death	Acinetobacter	0.0140449
Death	Acinetobacter	0.0395123
Death	Acinetobacter	0.000225175
Death	Acinetobacter	0
Death	Acinetobacter	0.206546
Death	Acinetobacter	0.0102296
Death	Acinetobacter	0.00611261
Death	Acinetobacter	0.00190791
Death	Acinetobacter	0.00288184
Death	Acinetobacter	0.00102866
Death	Acinetobacter	0.0113222
Death	Acinetobacter	0.042658
Death	Acinetobacter	0.00311268
Death	Acinetobacter	0
Death	Acinetobacter	0
Death	Acinetobacter	0
Death	Acinetobacter	0.0429139
Death	Acinetobacter	0.0277778
Death	Acinetobacter	0
Death	Acinetobacter	0.016755
Death	Acinetobacter	0.00374054
Death	Acinetobacter	0
Death	Acinetobacter	0.000612683
Death	Acinetobacter	0
Death	Acinetobacter	0.000966717
Death	Acinetobacter	0.0800768
Death	Acinetobacter	0.0334242
Death	Acinetobacter	0.100102
Death	Acinetobacter	0.000206101
Death	Acinetobacter	0.0253351
Death	Acinetobacter	0.0724399
Death	Acinetobacter	0.0072692
Death	Acinetobacter	0.0147307
Death	Acinetobacter	0
Death	Acinetobacter	0
Death	Acinetobacter	0
Death	Acinetobacter	0.27368
Death	Acinetobacter	0
Death	Acinetobacter	0.0145437
Death	Acinetobacter	0.000803489
Death	Acinetobacter	0.17105
Death	Acinetobacter	0.00959587
Death	Acinetobacter	0.212956
Death	Acinetobacter	0
Death	Acinetobacter	0
Death	Acinetobacter	0.00173812
Death	Acinetobacter	0.00265987
Death	Acinetobacter	0.0230628
Death	Acinetobacter	0
Death	Acinetobacter	0.0108932
Death	Acinetobacter	0.0596005
Death	Acinetobacter	0.0295947
Death	Acinetobacter	0
Death	Acinetobacter	0
Death	Acinetobacter	0
Death	Acinetobacter	0.0238068
Death	Acinetobacter	0.0341463
Death	Acinetobacter	0.0165746
Death	Acinetobacter	0.000598086
Death	Acinetobacter	0.00742324
Death	Acinetobacter	0.0279337
Death	Acinetobacter	0.0360726
Death	Acinetobacter	0.242619
Death	Acinetobacter	0.013529
Death	Acinetobacter	0
Death	Acinetobacter	0.0217214
Death	Acinetobacter	0.00755782
Death	Acinetobacter	0.034576
Death	Acinetobacter	0
Death	Acinetobacter	0
Death	Acinetobacter	0.000293255
Death	Acinetobacter	0.020044
Death	Acinetobacter	0.0254134
Death	Acinetobacter	0
Death	Acinetobacter	0
Death	Acinetobacter	0
Death	Acinetobacter	0
Death	Acinetobacter	0.0375038
Death	Mycobacterium	0.317718
Death	Mycobacterium	0
Death	Mycobacterium	0.00676546
Death	Mycobacterium	0
Death	Mycobacterium	0.0265463
Death	Mycobacterium	0
Death	Mycobacterium	0.333333
Death	Mycobacterium	0
Death	Mycobacterium	0
Death	Mycobacterium	0
Death	Mycobacterium	0
Death	Mycobacterium	0
Death	Mycobacterium	0
Death	Mycobacterium	0
Death	Mycobacterium	0
Death	Mycobacterium	0.103352
Death	Mycobacterium	0.0331381
Death	Mycobacterium	0
Death	Mycobacterium	0
Death	Mycobacterium	0
Death	Mycobacterium	0
Death	Mycobacterium	0
Death	Mycobacterium	0.298375
Death	Mycobacterium	0.000453858
Death	Mycobacterium	0
Death	Mycobacterium	0
Death	Mycobacterium	0.000234219
Death	Mycobacterium	0
Death	Mycobacterium	0
Death	Mycobacterium	0
Death	Mycobacterium	0
Death	Mycobacterium	0.039035
Death	Mycobacterium	0
Death	Mycobacterium	0
Death	Mycobacterium	0.0321743
Death	Mycobacterium	0.0891691
Death	Mycobacterium	0.049143
Death	Mycobacterium	0
Death	Mycobacterium	0
Death	Mycobacterium	0
Death	Mycobacterium	0
Death	Mycobacterium	0
Death	Mycobacterium	0
Death	Mycobacterium	0
Death	Mycobacterium	0
Death	Mycobacterium	0
Death	Mycobacterium	0.725396
Death	Mycobacterium	0
Death	Mycobacterium	0
Death	Mycobacterium	0.33384
Death	Mycobacterium	0
Death	Mycobacterium	0
Death	Mycobacterium	0.00157525
Death	Mycobacterium	0
Death	Mycobacterium	0
Death	Mycobacterium	0.0312468
Death	Mycobacterium	0
Death	Mycobacterium	0
Death	Mycobacterium	0
Death	Mycobacterium	0.0724191
Death	Mycobacterium	0
Death	Mycobacterium	0
Death	Mycobacterium	0.00114416
Death	Mycobacterium	0.005689
Death	Mycobacterium	0.18488
Death	Mycobacterium	0
Death	Mycobacterium	0
Death	Mycobacterium	0
Death	Mycobacterium	0
Death	Mycobacterium	0.000403063
Death	Mycobacterium	0
Death	Mycobacterium	0
Death	Mycobacterium	0
Death	Mycobacterium	0.0118354
Death	Mycobacterium	0
Death	Mycobacterium	0
Death	Mycobacterium	0
Death	Mycobacterium	0
Death	Mycobacterium	0
Death	Mycobacterium	0.00221656
Death	Mycobacterium	0
Death	Mycobacterium	0.0101435
Death	Mycobacterium	0.000378896
Death	Mycobacterium	0
Death	Mycobacterium	0
Death	Mycobacterium	0.29897
Death	Mycobacterium	0.155048
Death	Mycobacterium	0
Death	Mycobacterium	0.000227816
Death	Mycobacterium	0
Death	Mycobacterium	0
Death	Mycobacterium	0.000199362
Death	Mycobacterium	0
Death	Mycobacterium	0
Death	Mycobacterium	0.000676361
Death	Mycobacterium	0
Death	Mycobacterium	0
Death	Mycobacterium	0
Death	Mycobacterium	0.14421
Death	Mycobacterium	0.710617
Death	Mycobacterium	0
Death	Mycobacterium	0
Death	Mycobacterium	0.0625846
Death	Mycobacterium	0
Death	Mycobacterium	0.123808
Death	Mycobacterium	0
Death	Mycobacterium	0.000549073
Death	Mycobacterium	0.0679166
Death	Mycobacterium	0.00024325
Death	Mycobacterium	0
Death	Mycobacterium	0.000750075
Death	Variovorax	0.027788
Death	Variovorax	0.0567571
Death	Variovorax	0.00064433
Death	Variovorax	0.0118886
Death	Variovorax	0.0429666
Death	Variovorax	0
Death	Variovorax	0.00972985
Death	Variovorax	0
Death	Variovorax	0
Death	Variovorax	0
Death	Variovorax	0.00639955
Death	Variovorax	0.0672775
Death	Variovorax	0.0382395
Death	Variovorax	0.027376
Death	Variovorax	0.000765278
Death	Variovorax	0
Death	Variovorax	0.00026617
Death	Variovorax	0
Death	Variovorax	0.0202502
Death	Variovorax	0.114733
Death	Variovorax	0
Death	Variovorax	0
Death	Variovorax	0.00983204
Death	Variovorax	0.0266263
Death	Variovorax	0
Death	Variovorax	0.019975
Death	Variovorax	0.0737791
Death	Variovorax	0.00597177
Death	Variovorax	0
Death	Variovorax	0
Death	Variovorax	0
Death	Variovorax	0.0406917
Death	Variovorax	0
Death	Variovorax	0.0151685
Death	Variovorax	0.0421088
Death	Variovorax	0.00675524
Death	Variovorax	0.000303352
Death	Variovorax	0
Death	Variovorax	0.0675365
Death	Variovorax	0.00587751
Death	Variovorax	0.000508776
Death	Variovorax	0.0902978
Death	Variovorax	0.000587803
Death	Variovorax	0.00893194
Death	Variovorax	0.015768
Death	Variovorax	0.00051878
Death	Variovorax	0.0039584
Death	Variovorax	0.0318432
Death	Variovorax	0.0197691
Death	Variovorax	0.0161366
Death	Variovorax	0.0286413
Death	Variovorax	0
Death	Variovorax	0.0400974
Death	Variovorax	0.00306044
Death	Variovorax	0
Death	Variovorax	0
Death	Variovorax	0.0152763
Death	Variovorax	0.00055241
Death	Variovorax	0.00109694
Death	Variovorax	0.000474102
Death	Variovorax	0.0278625
Death	Variovorax	0.036892
Death	Variovorax	0.000653808
Death	Variovorax	0.0187105
Death	Variovorax	0.011025
Death	Variovorax	0.00475679
Death	Variovorax	0.0141193
Death	Variovorax	0.0405235
Death	Variovorax	0.0375615
Death	Variovorax	0
Death	Variovorax	0.00360813
Death	Variovorax	0.0187856
Death	Variovorax	0.000229568
Death	Variovorax	0
Death	Variovorax	0.0422587
Death	Variovorax	0
Death	Variovorax	0.00054484
Death	Variovorax	0.000243992
Death	Variovorax	0.00799537
Death	Variovorax	0.000775795
Death	Variovorax	0.000192994
Death	Variovorax	0.0511962
Death	Variovorax	0
Death	Variovorax	0
Death	Variovorax	0
Death	Variovorax	0
Death	Variovorax	0.039768
Death	Variovorax	0.00419269
Death	Variovorax	0.00227816
Death	Variovorax	0.00387374
Death	Variovorax	0.0217048
Death	Variovorax	0
Death	Variovorax	0.0263187
Death	Variovorax	0.0344828
Death	Variovorax	0.00935633
Death	Variovorax	0.000306466
Death	Variovorax	0.000638162
Death	Variovorax	0.0196133
Death	Variovorax	0.017965
Death	Variovorax	0.000182116
Death	Variovorax	0.0455862
Death	Variovorax	0.000272665
Death	Variovorax	0.0242215
Death	Variovorax	0.0560117
Death	Variovorax	0.000488878
Death	Variovorax	0.0736877
Death	Variovorax	0.000411805
Death	Variovorax	0.000248324
Death	Variovorax	0.0606908
Death	Variovorax	0
Death	Variovorax	0.0520552
Death	Sandaracinomonas	0.000245912
Death	Sandaracinomonas	0
Death	Sandaracinomonas	0.00757088
Death	Sandaracinomonas	0.0106847
Death	Sandaracinomonas	0.028462
Death	Sandaracinomonas	0.0382353
Death	Sandaracinomonas	0.0117903
Death	Sandaracinomonas	0.0157291
Death	Sandaracinomonas	0
Death	Sandaracinomonas	0.0170606
Death	Sandaracinomonas	0.0236505
Death	Sandaracinomonas	0.0219895
Death	Sandaracinomonas	0
Death	Sandaracinomonas	0.0229528
Death	Sandaracinomonas	0.0206625
Death	Sandaracinomonas	0
Death	Sandaracinomonas	0
Death	Sandaracinomonas	0.0181465
Death	Sandaracinomonas	0
Death	Sandaracinomonas	0
Death	Sandaracinomonas	0.0422456
Death	Sandaracinomonas	0.0118746
Death	Sandaracinomonas	0
Death	Sandaracinomonas	0.0163389
Death	Sandaracinomonas	0
Death	Sandaracinomonas	0
Death	Sandaracinomonas	0
Death	Sandaracinomonas	0.0704397
Death	Sandaracinomonas	0
Death	Sandaracinomonas	0.00819162
Death	Sandaracinomonas	0.000758397
Death	Sandaracinomonas	0.0267136
Death	Sandaracinomonas	0
Death	Sandaracinomonas	0.0136236
Death	Sandaracinomonas	0.000451569
Death	Sandaracinomonas	0.0151993
Death	Sandaracinomonas	0
Death	Sandaracinomonas	0.0027201
Death	Sandaracinomonas	0.0367432
Death	Sandaracinomonas	0.0255084
Death	Sandaracinomonas	0.0410837
Death	Sandaracinomonas	0.0294589
Death	Sandaracinomonas	0.041881
Death	Sandaracinomonas	0
Death	Sandaracinomonas	0.00154864
Death	Sandaracinomonas	0
Death	Sandaracinomonas	0.00240609
Death	Sandaracinomonas	0.0221678
Death	Sandaracinomonas	0.00859122
Death	Sandaracinomonas	0.000350795
Death	Sandaracinomonas	0
Death	Sandaracinomonas	0.000357015
Death	Sandaracinomonas	0.0284978
Death	Sandaracinomonas	0
Death	Sandaracinomonas	0.0315255
Death	Sandaracinomonas	0.0571837
Death	Sandaracinomonas	0
Death	Sandaracinomonas	0
Death	Sandaracinomonas	0.0399013
Death	Sandaracinomonas	0
Death	Sandaracinomonas	0.0492886
Death	Sandaracinomonas	0.0165911
Death	Sandaracinomonas	0
Death	Sandaracinomonas	0.020354
Death	Sandaracinomonas	0.0158711
Death	Sandaracinomonas	0.00030689
Death	Sandaracinomonas	0.0250618
Death	Sandaracinomonas	0
Death	Sandaracinomonas	0
Death	Sandaracinomonas	0
Death	Sandaracinomonas	0.0180407
Death	Sandaracinomonas	0
Death	Sandaracinomonas	0.0522268
Death	Sandaracinomonas	0.000375728
Death	Sandaracinomonas	0
Death	Sandaracinomonas	0.0100853
Death	Sandaracinomonas	0.000217936
Death	Sandaracinomonas	0
Death	Sandaracinomonas	0.0105446
Death	Sandaracinomonas	0.0240497
Death	Sandaracinomonas	0.0208434
Death	Sandaracinomonas	0.0174163
Death	Sandaracinomonas	0.00568343
Death	Sandaracinomonas	0
Death	Sandaracinomonas	0.0057183
Death	Sandaracinomonas	0.0268176
Death	Sandaracinomonas	0.000355072
Death	Sandaracinomonas	0
Death	Sandaracinomonas	0
Death	Sandaracinomonas	0
Death	Sandaracinomonas	0
Death	Sandaracinomonas	0
Death	Sandaracinomonas	0.0105725
Death	Sandaracinomonas	0.0205827
Death	Sandaracinomonas	0.0154436
Death	Sandaracinomonas	0
Death	Sandaracinomonas	0.030887
Death	Sandaracinomonas	0.000420286
Death	Sandaracinomonas	0.0230279
Death	Sandaracinomonas	0.00764888
Death	Sandaracinomonas	0.000386324
Death	Sandaracinomonas	0.0319018
Death	Sandaracinomonas	0.0460358
Death	Sandaracinomonas	0.000293255
Death	Sandaracinomonas	0.0443657
Death	Sandaracinomonas	0.049717
Death	Sandaracinomonas	0.035278
Death	Sandaracinomonas	0
Death	Sandaracinomonas	0.000364875
Death	Sandaracinomonas	0.0610768
Death	Sandaracinomonas	0.0219022
Survivors	Flavobacterium	0.450179
Survivors	Flavobacterium	0.410499
Survivors	Flavobacterium	0.314023
Survivors	Flavobacterium	0.332855
Survivors	Flavobacterium	0.320503
Survivors	Flavobacterium	0.430426
Survivors	Flavobacterium	0.327791
Survivors	Flavobacterium	0.263134
Survivors	Flavobacterium	0.442747
Survivors	Flavobacterium	0.336547
Survivors	Flavobacterium	0.430375
Survivors	Flavobacterium	0.407925
Survivors	Flavobacterium	0.2921
Survivors	Flavobacterium	0.429446
Survivors	Flavobacterium	0.389304
Survivors	Flavobacterium	0.474287
Survivors	Flavobacterium	0.418251
Survivors	Flavobacterium	0.318019
Survivors	Flavobacterium	0.393501
Survivors	Flavobacterium	0.35649
Survivors	Flavobacterium	0.475365
Survivors	Flavobacterium	0.257998
Survivors	Flavobacterium	0.4747
Survivors	Flavobacterium	0.429541
Survivors	Flavobacterium	0.352888
Survivors	Flavobacterium	0.174233
Survivors	Flavobacterium	0.373214
Survivors	Flavobacterium	0.302968
Survivors	Flavobacterium	0.273457
Survivors	Flavobacterium	0.277977
Survivors	Flavobacterium	0.281649
Survivors	Flavobacterium	0.209012
Survivors	Flavobacterium	0.237998
Survivors	Flavobacterium	0.292971
Survivors	Flavobacterium	0.138098
Survivors	Flavobacterium	0.485762
Survivors	Flavobacterium	0.329598
Survivors	Flavobacterium	0.218514
Survivors	Flavobacterium	0.435688
Survivors	Flavobacterium	0.286873
Survivors	Flavobacterium	0.511388
Survivors	Flavobacterium	0.445786
Survivors	Flavobacterium	0.370612
Survivors	Flavobacterium	0.420713
Survivors	Flavobacterium	0.408336
Survivors	Flavobacterium	0.300137
Survivors	Flavobacterium	0.433735
Survivors	Flavobacterium	0.364385
Survivors	Flavobacterium	0.415495
Survivors	Flavobacterium	0.341841
Survivors	Flavobacterium	0.207215
Survivors	Flavobacterium	0.255042
Survivors	Flavobacterium	0.457815
Survivors	Flavobacterium	0.294015
Survivors	Flavobacterium	0.237398
Survivors	Flavobacterium	0.20563
Survivors	Flavobacterium	0.255319
Survivors	Flavobacterium	0.390303
Survivors	Flavobacterium	0.0138729
Survivors	Flavobacterium	0.320572
Survivors	Flavobacterium	0.384313
Survivors	Flavobacterium	0.276235
Survivors	Flavobacterium	0.367335
Survivors	Flavobacterium	0.170384
Survivors	Flavobacterium	0.355826
Survivors	Flavobacterium	0.40561
Survivors	Flavobacterium	0.416709
Survivors	Flavobacterium	0.246224
Survivors	Flavobacterium	0.430687
Survivors	Flavobacterium	0.370685
Survivors	Flavobacterium	0.444575
Survivors	Flavobacterium	0.24498
Survivors	Flavobacterium	0.33099
Survivors	Flavobacterium	0.13441
Survivors	Flavobacterium	0.0826031
Survivors	Flavobacterium	0.392772
Survivors	Flavobacterium	0.365496
Survivors	Flavobacterium	0.284437
Survivors	Flavobacterium	0.530767
Survivors	Flavobacterium	0.270154
Survivors	Flavobacterium	0.38039
Survivors	Flavobacterium	0.169989
Survivors	Flavobacterium	0.425867
Survivors	Flavobacterium	0.25469
Survivors	Flavobacterium	0.495551
Survivors	Flavobacterium	0.291433
Survivors	Flavobacterium	0.436088
Survivors	Flavobacterium	0.378065
Survivors	Flavobacterium	0.484958
Survivors	Flavobacterium	0.391346
Survivors	Flavobacterium	0.477409
Survivors	Flavobacterium	0.358173
Survivors	Flavobacterium	0.23345
Survivors	Flavobacterium	0.322488
Survivors	Flavobacterium	0.257488
Survivors	Flavobacterium	0.403729
Survivors	Flavobacterium	0.34317
Survivors	Flavobacterium	0.136464
Survivors	Flavobacterium	0.433086
Survivors	Flavobacterium	0.231865
Survivors	Flavobacterium	0.485259
Survivors	Flavobacterium	0.402576
Survivors	Flavobacterium	0.362436
Survivors	Flavobacterium	0.409275
Survivors	Pseudomonas	0.0243728
Survivors	Pseudomonas	0.0635083
Survivors	Pseudomonas	0.120674
Survivors	Pseudomonas	0.0491904
Survivors	Pseudomonas	0.0466845
Survivors	Pseudomonas	0.128646
Survivors	Pseudomonas	0.136975
Survivors	Pseudomonas	0.0957257
Survivors	Pseudomonas	0.135647
Survivors	Pseudomonas	0.13683
Survivors	Pseudomonas	0.166439
Survivors	Pseudomonas	0.125737
Survivors	Pseudomonas	0.212853
Survivors	Pseudomonas	0.0955124
Survivors	Pseudomonas	0.0740238
Survivors	Pseudomonas	0.124411
Survivors	Pseudomonas	0.192155
Survivors	Pseudomonas	0.220889
Survivors	Pseudomonas	0.162476
Survivors	Pseudomonas	0.136123
Survivors	Pseudomonas	0.169558
Survivors	Pseudomonas	0.101485
Survivors	Pseudomonas	0.0892943
Survivors	Pseudomonas	0.111829
Survivors	Pseudomonas	0.187519
Survivors	Pseudomonas	0.301112
Survivors	Pseudomonas	0.206654
Survivors	Pseudomonas	0.14806
Survivors	Pseudomonas	0.246817
Survivors	Pseudomonas	0.108461
Survivors	Pseudomonas	0.228854
Survivors	Pseudomonas	0.19759
Survivors	Pseudomonas	0.182812
Survivors	Pseudomonas	0.191263
Survivors	Pseudomonas	0.175356
Survivors	Pseudomonas	0.13385
Survivors	Pseudomonas	0.119592
Survivors	Pseudomonas	0.352915
Survivors	Pseudomonas	0.117284
Survivors	Pseudomonas	0.225454
Survivors	Pseudomonas	0.0799526
Survivors	Pseudomonas	0.0185649
Survivors	Pseudomonas	0.029649
Survivors	Pseudomonas	0.0506088
Survivors	Pseudomonas	0.0568984
Survivors	Pseudomonas	0.15929
Survivors	Pseudomonas	0.122975
Survivors	Pseudomonas	0.143772
Survivors	Pseudomonas	0.0624229
Survivors	Pseudomonas	0.0329575
Survivors	Pseudomonas	0.0475791
Survivors	Pseudomonas	0.159352
Survivors	Pseudomonas	0.0732126
Survivors	Pseudomonas	0.0805027
Survivors	Pseudomonas	0.0244552
Survivors	Pseudomonas	0.0486876
Survivors	Pseudomonas	0.181346
Survivors	Pseudomonas	0.1203
Survivors	Pseudomonas	0.0021343
Survivors	Pseudomonas	0.32848
Survivors	Pseudomonas	0.135107
Survivors	Pseudomonas	0.0555419
Survivors	Pseudomonas	0.0610342
Survivors	Pseudomonas	0.0731103
Survivors	Pseudomonas	0.119706
Survivors	Pseudomonas	0.177808
Survivors	Pseudomonas	0.175323
Survivors	Pseudomonas	0.237443
Survivors	Pseudomonas	0.0789665
Survivors	Pseudomonas	0.140503
Survivors	Pseudomonas	0.0483491
Survivors	Pseudomonas	0.133104
Survivors	Pseudomonas	0.209265
Survivors	Pseudomonas	0.128108
Survivors	Pseudomonas	0.0215228
Survivors	Pseudomonas	0.086405
Survivors	Pseudomonas	0.0948669
Survivors	Pseudomonas	0.110214
Survivors	Pseudomonas	0.13595
Survivors	Pseudomonas	0.270937
Survivors	Pseudomonas	0.0521712
Survivors	Pseudomonas	0.113161
Survivors	Pseudomonas	0.216672
Survivors	Pseudomonas	0.106852
Survivors	Pseudomonas	0.0551387
Survivors	Pseudomonas	0.0385335
Survivors	Pseudomonas	0.0441821
Survivors	Pseudomonas	0.0513603
Survivors	Pseudomonas	0.0714009
Survivors	Pseudomonas	0.0502704
Survivors	Pseudomonas	0.088722
Survivors	Pseudomonas	0.063914
Survivors	Pseudomonas	0.107931
Survivors	Pseudomonas	0.0709501
Survivors	Pseudomonas	0.038508
Survivors	Pseudomonas	0.15553
Survivors	Pseudomonas	0.034445
Survivors	Pseudomonas	0.083639
Survivors	Pseudomonas	0.093654
Survivors	Pseudomonas	0.032589
Survivors	Pseudomonas	0.130108
Survivors	Pseudomonas	0.00868654
Survivors	Pseudomonas	0.0601331
Survivors	Pseudomonas	0.0230091
Survivors	Candidatus_Aquiluna	0.0442652
Survivors	Candidatus_Aquiluna	0.0379001
Survivors	Candidatus_Aquiluna	0.0704183
Survivors	Candidatus_Aquiluna	0.0288994
Survivors	Candidatus_Aquiluna	0.0800305
Survivors	Candidatus_Aquiluna	0.0761377
Survivors	Candidatus_Aquiluna	0.0128266
Survivors	Candidatus_Aquiluna	0.132458
Survivors	Candidatus_Aquiluna	0.0411829
Survivors	Candidatus_Aquiluna	0.0348488
Survivors	Candidatus_Aquiluna	0.0350398
Survivors	Candidatus_Aquiluna	0.0331825
Survivors	Candidatus_Aquiluna	0.0100266
Survivors	Candidatus_Aquiluna	0.0416367
Survivors	Candidatus_Aquiluna	0.0687606
Survivors	Candidatus_Aquiluna	0.088592
Survivors	Candidatus_Aquiluna	0.0445061
Survivors	Candidatus_Aquiluna	0.0547737
Survivors	Candidatus_Aquiluna	0.0370019
Survivors	Candidatus_Aquiluna	0.0237961
Survivors	Candidatus_Aquiluna	0.0428607
Survivors	Candidatus_Aquiluna	0.0900947
Survivors	Candidatus_Aquiluna	0.0602976
Survivors	Candidatus_Aquiluna	0.028927
Survivors	Candidatus_Aquiluna	0.0199252
Survivors	Candidatus_Aquiluna	0.0294648
Survivors	Candidatus_Aquiluna	0.0584346
Survivors	Candidatus_Aquiluna	0.0295684
Survivors	Candidatus_Aquiluna	0.0376102
Survivors	Candidatus_Aquiluna	0.0219796
Survivors	Candidatus_Aquiluna	0.0252306
Survivors	Candidatus_Aquiluna	0.015469
Survivors	Candidatus_Aquiluna	0.0138234
Survivors	Candidatus_Aquiluna	0
Survivors	Candidatus_Aquiluna	0.0358596
Survivors	Candidatus_Aquiluna	0.0212742
Survivors	Candidatus_Aquiluna	0.0790992
Survivors	Candidatus_Aquiluna	0.0794322
Survivors	Candidatus_Aquiluna	0.0414872
Survivors	Candidatus_Aquiluna	0.000108131
Survivors	Candidatus_Aquiluna	0.0695136
Survivors	Candidatus_Aquiluna	0.0703872
Survivors	Candidatus_Aquiluna	0
Survivors	Candidatus_Aquiluna	0.0382866
Survivors	Candidatus_Aquiluna	0.0153188
Survivors	Candidatus_Aquiluna	0.000273224
Survivors	Candidatus_Aquiluna	0.0790749
Survivors	Candidatus_Aquiluna	0.0625095
Survivors	Candidatus_Aquiluna	0.0397237
Survivors	Candidatus_Aquiluna	0.0887127
Survivors	Candidatus_Aquiluna	0.000838926
Survivors	Candidatus_Aquiluna	0.023593
Survivors	Candidatus_Aquiluna	0.0320144
Survivors	Candidatus_Aquiluna	0.0201568
Survivors	Candidatus_Aquiluna	0.0780236
Survivors	Candidatus_Aquiluna	0.00435197
Survivors	Candidatus_Aquiluna	0.0773132
Survivors	Candidatus_Aquiluna	0.0250212
Survivors	Candidatus_Aquiluna	0.00098506
Survivors	Candidatus_Aquiluna	0.0268608
Survivors	Candidatus_Aquiluna	0.0445821
Survivors	Candidatus_Aquiluna	0.0172032
Survivors	Candidatus_Aquiluna	0.0405953
Survivors	Candidatus_Aquiluna	0.00526642
Survivors	Candidatus_Aquiluna	0.0487163
Survivors	Candidatus_Aquiluna	0.0185499
Survivors	Candidatus_Aquiluna	0.0170749
Survivors	Candidatus_Aquiluna	0.0284177
Survivors	Candidatus_Aquiluna	0.0425316
Survivors	Candidatus_Aquiluna	0.0466609
Survivors	Candidatus_Aquiluna	0.0185463
Survivors	Candidatus_Aquiluna	0
Survivors	Candidatus_Aquiluna	0.0756124
Survivors	Candidatus_Aquiluna	0.0155838
Survivors	Candidatus_Aquiluna	0.000255211
Survivors	Candidatus_Aquiluna	0.01472
Survivors	Candidatus_Aquiluna	0.0501164
Survivors	Candidatus_Aquiluna	0.0296701
Survivors	Candidatus_Aquiluna	0.000454683
Survivors	Candidatus_Aquiluna	0.0737021
Survivors	Candidatus_Aquiluna	0.0171858
Survivors	Candidatus_Aquiluna	0.0278569
Survivors	Candidatus_Aquiluna	0.0244989
Survivors	Candidatus_Aquiluna	0.0730016
Survivors	Candidatus_Aquiluna	0.0654336
Survivors	Candidatus_Aquiluna	0.043771
Survivors	Candidatus_Aquiluna	0.0664418
Survivors	Candidatus_Aquiluna	0.0359888
Survivors	Candidatus_Aquiluna	0.0340865
Survivors	Candidatus_Aquiluna	0.0666561
Survivors	Candidatus_Aquiluna	0.0203028
Survivors	Candidatus_Aquiluna	0
Survivors	Candidatus_Aquiluna	0.0175879
Survivors	Candidatus_Aquiluna	0.0546822
Survivors	Candidatus_Aquiluna	0.000329128
Survivors	Candidatus_Aquiluna	0.0392711
Survivors	Candidatus_Aquiluna	0.0388305
Survivors	Candidatus_Aquiluna	0.0227439
Survivors	Candidatus_Aquiluna	0.0225179
Survivors	Candidatus_Aquiluna	0.0295715
Survivors	Candidatus_Aquiluna	0.0445077
Survivors	Candidatus_Aquiluna	0.0516699
Survivors	Candidatus_Aquiluna	0.112845
Survivors	Candidatus_Aquiluna	0.0656891
Survivors	Fluviicola	0.097491
Survivors	Fluviicola	0.0139565
Survivors	Fluviicola	0.053867
Survivors	Fluviicola	0.0266448
Survivors	Fluviicola	0.0369665
Survivors	Fluviicola	0.0514877
Survivors	Fluviicola	0.0259699
Survivors	Fluviicola	0.0235975
Survivors	Fluviicola	0.0453379
Survivors	Fluviicola	0.0245003
Survivors	Fluviicola	0.0318544
Survivors	Fluviicola	0.0475799
Survivors	Fluviicola	0.0343078
Survivors	Fluviicola	0.0139189
Survivors	Fluviicola	0.0587436
Survivors	Fluviicola	0.0426679
Survivors	Fluviicola	0
Survivors	Fluviicola	0
Survivors	Fluviicola	0
Survivors	Fluviicola	0.148303
Survivors	Fluviicola	0.0163399
Survivors	Fluviicola	0.0354492
Survivors	Fluviicola	0
Survivors	Fluviicola	0.062702
Survivors	Fluviicola	0.021948
Survivors	Fluviicola	0
Survivors	Fluviicola	0.0253785
Survivors	Fluviicola	0.0452223
Survivors	Fluviicola	0.0159647
Survivors	Fluviicola	0.0491309
Survivors	Fluviicola	0.0192286
Survivors	Fluviicola	0.026801
Survivors	Fluviicola	0.01018
Survivors	Fluviicola	0
Survivors	Fluviicola	0.0358596
Survivors	Fluviicola	0.0227147
Survivors	Fluviicola	0.000221877
Survivors	Fluviicola	0.0285412
Survivors	Fluviicola	0.0373241
Survivors	Fluviicola	0.0941825
Survivors	Fluviicola	0
Survivors	Fluviicola	0.0101367
Survivors	Fluviicola	0.0556214
Survivors	Fluviicola	0.075253
Survivors	Fluviicola	0.014523
Survivors	Fluviicola	0
Survivors	Fluviicola	0.0438997
Survivors	Fluviicola	0.0429944
Survivors	Fluviicola	0.0397237
Survivors	Fluviicola	0.0605873
Survivors	Fluviicola	0.00994727
Survivors	Fluviicola	0.000131804
Survivors	Fluviicola	0.0420565
Survivors	Fluviicola	0.110987
Survivors	Fluviicola	0.000332723
Survivors	Fluviicola	0.00856793
Survivors	Fluviicola	0.0294409
Survivors	Fluviicola	0.027283
Survivors	Fluviicola	0.00229847
Survivors	Fluviicola	0.00640141
Survivors	Fluviicola	0.000302252
Survivors	Fluviicola	0
Survivors	Fluviicola	0.000470943
Survivors	Fluviicola	0.0267968
Survivors	Fluviicola	0.000219443
Survivors	Fluviicola	0.0571202
Survivors	Fluviicola	0.0371989
Survivors	Fluviicola	0
Survivors	Fluviicola	0.0479025
Survivors	Fluviicola	0.00104076
Survivors	Fluviicola	0.0231561
Survivors	Fluviicola	0.051922
Survivors	Fluviicola	0.0413206
Survivors	Fluviicola	0.00423972
Survivors	Fluviicola	0.00297746
Survivors	Fluviicola	0.0418861
Survivors	Fluviicola	0.0562924
Survivors	Fluviicola	0.000237361
Survivors	Fluviicola	0.000151561
Survivors	Fluviicola	0
Survivors	Fluviicola	0
Survivors	Fluviicola	0
Survivors	Fluviicola	0.0462934
Survivors	Fluviicola	0.0338499
Survivors	Fluviicola	0.000523469
Survivors	Fluviicola	0.00823045
Survivors	Fluviicola	0
Survivors	Fluviicola	0.0374527
Survivors	Fluviicola	0.044674
Survivors	Fluviicola	0
Survivors	Fluviicola	0.0569182
Survivors	Fluviicola	0.104497
Survivors	Fluviicola	0.118855
Survivors	Fluviicola	0.061244
Survivors	Fluviicola	0.000219419
Survivors	Fluviicola	0.000423789
Survivors	Fluviicola	0.0688899
Survivors	Fluviicola	0.0190756
Survivors	Fluviicola	0.0213664
Survivors	Fluviicola	0.0161738
Survivors	Fluviicola	0.0182129
Survivors	Fluviicola	0.00104838
Survivors	Fluviicola	0.0894903
Survivors	Fluviicola	0.0627086
Survivors	Cutibacterium	0.00949821
Survivors	Cutibacterium	0
Survivors	Cutibacterium	0
Survivors	Cutibacterium	0.0662021
Survivors	Cutibacterium	0.0139101
Survivors	Cutibacterium	0.00700117
Survivors	Cutibacterium	0.045289
Survivors	Cutibacterium	0
Survivors	Cutibacterium	0
Survivors	Cutibacterium	0.0130019
Survivors	Cutibacterium	0.00250284
Survivors	Cutibacterium	0.0102838
Survivors	Cutibacterium	0
Survivors	Cutibacterium	0.0278378
Survivors	Cutibacterium	0
Survivors	Cutibacterium	0.00101055
Survivors	Cutibacterium	0.0212625
Survivors	Cutibacterium	0.00620861
Survivors	Cutibacterium	0
Survivors	Cutibacterium	0
Survivors	Cutibacterium	0
Survivors	Cutibacterium	0
Survivors	Cutibacterium	0
Survivors	Cutibacterium	0
Survivors	Cutibacterium	0.00232629
Survivors	Cutibacterium	0
Survivors	Cutibacterium	0.00319898
Survivors	Cutibacterium	0
Survivors	Cutibacterium	0.0415279
Survivors	Cutibacterium	0.0532969
Survivors	Cutibacterium	0.121263
Survivors	Cutibacterium	0.080313
Survivors	Cutibacterium	0.236069
Survivors	Cutibacterium	0.0971097
Survivors	Cutibacterium	0.146617
Survivors	Cutibacterium	0.0099723
Survivors	Cutibacterium	0.00820945
Survivors	Cutibacterium	0
Survivors	Cutibacterium	0
Survivors	Cutibacterium	0.00237889
Survivors	Cutibacterium	0.00166074
Survivors	Cutibacterium	0.0192483
Survivors	Cutibacterium	0.00118596
Survivors	Cutibacterium	0
Survivors	Cutibacterium	0.011141
Survivors	Cutibacterium	0.000546448
Survivors	Cutibacterium	0.00623182
Survivors	Cutibacterium	0.0259186
Survivors	Cutibacterium	0.0143104
Survivors	Cutibacterium	0.0484451
Survivors	Cutibacterium	0.00623202
Survivors	Cutibacterium	0.000395413
Survivors	Cutibacterium	0.0121878
Survivors	Cutibacterium	0.0549956
Survivors	Cutibacterium	0.000665447
Survivors	Cutibacterium	0
Survivors	Cutibacterium	0
Survivors	Cutibacterium	0.0740741
Survivors	Cutibacterium	0.0996552
Survivors	Cutibacterium	0
Survivors	Cutibacterium	0.0516851
Survivors	Cutibacterium	0.0707791
Survivors	Cutibacterium	0.00103607
Survivors	Cutibacterium	0.00371747
Survivors	Cutibacterium	0.00274303
Survivors	Cutibacterium	0.000226219
Survivors	Cutibacterium	0
Survivors	Cutibacterium	0.00717523
Survivors	Cutibacterium	0.00101611
Survivors	Cutibacterium	0.0192541
Survivors	Cutibacterium	0.0279803
Survivors	Cutibacterium	0.0265347
Survivors	Cutibacterium	0
Survivors	Cutibacterium	0
Survivors	Cutibacterium	0.506168
Survivors	Cutibacterium	0
Survivors	Cutibacterium	0
Survivors	Cutibacterium	0
Survivors	Cutibacterium	0
Survivors	Cutibacterium	0.000521785
Survivors	Cutibacterium	0.00675157
Survivors	Cutibacterium	0.000371425
Survivors	Cutibacterium	0.00206809
Survivors	Cutibacterium	0.0275285
Survivors	Cutibacterium	0.0235561
Survivors	Cutibacterium	0.139668
Survivors	Cutibacterium	0
Survivors	Cutibacterium	0
Survivors	Cutibacterium	0.0117495
Survivors	Cutibacterium	0
Survivors	Cutibacterium	0
Survivors	Cutibacterium	0
Survivors	Cutibacterium	0
Survivors	Cutibacterium	0
Survivors	Cutibacterium	0.10181
Survivors	Cutibacterium	0
Survivors	Cutibacterium	0
Survivors	Cutibacterium	0
Survivors	Cutibacterium	0
Survivors	Cutibacterium	0.0006035
Survivors	Cutibacterium	0.000455322
Survivors	Cutibacterium	0
Survivors	Cutibacterium	0.000763942
Survivors	Cutibacterium	0
Survivors	Comamonas	0.0388889
Survivors	Comamonas	0.0226633
Survivors	Comamonas	0.015799
Survivors	Comamonas	0.0129125
Survivors	Comamonas	0.0163872
Survivors	Comamonas	0.0533839
Survivors	Comamonas	0.00870942
Survivors	Comamonas	0.0376224
Survivors	Comamonas	0.0207748
Survivors	Comamonas	0.0212277
Survivors	Comamonas	0.0267349
Survivors	Comamonas	0.0297546
Survivors	Comamonas	0.0240396
Survivors	Comamonas	0.0166787
Survivors	Comamonas	0
Survivors	Comamonas	0.0289692
Survivors	Comamonas	0.0138669
Survivors	Comamonas	0.0296634
Survivors	Comamonas	0
Survivors	Comamonas	0.025375
Survivors	Comamonas	0.0186023
Survivors	Comamonas	0.0345534
Survivors	Comamonas	0
Survivors	Comamonas	0.0269877
Survivors	Comamonas	0.01062
Survivors	Comamonas	0
Survivors	Comamonas	0.0424398
Survivors	Comamonas	0.0261985
Survivors	Comamonas	0.0203722
Survivors	Comamonas	0.00876311
Survivors	Comamonas	0.0124486
Survivors	Comamonas	0.022484
Survivors	Comamonas	0.0410416
Survivors	Comamonas	0
Survivors	Comamonas	0
Survivors	Comamonas	0.00742382
Survivors	Comamonas	0.0350566
Survivors	Comamonas	0.0169133
Survivors	Comamonas	0.115274
Survivors	Comamonas	0.0361159
Survivors	Comamonas	0.0288256
Survivors	Comamonas	0.0169704
Survivors	Comamonas	0.0537239
Survivors	Comamonas	0.015256
Survivors	Comamonas	0.0241719
Survivors	Comamonas	0.000409836
Survivors	Comamonas	0.046254
Survivors	Comamonas	0
Survivors	Comamonas	0.060079
Survivors	Comamonas	0.000247801
Survivors	Comamonas	0.0365532
Survivors	Comamonas	0.0340055
Survivors	Comamonas	0.015621
Survivors	Comamonas	0.0204056
Survivors	Comamonas	0.0259524
Survivors	Comamonas	0
Survivors	Comamonas	0.0440376
Survivors	Comamonas	0.000282725
Survivors	Comamonas	0
Survivors	Comamonas	0.00765658
Survivors	Comamonas	0.016775
Survivors	Comamonas	0.033915
Survivors	Comamonas	0.000565131
Survivors	Comamonas	0.0306691
Survivors	Comamonas	0.0273206
Survivors	Comamonas	0.018663
Survivors	Comamonas	0.0202256
Survivors	Comamonas	0.0224698
Survivors	Comamonas	0.0117579
Survivors	Comamonas	0.000346921
Survivors	Comamonas	0.0275515
Survivors	Comamonas	0.0661216
Survivors	Comamonas	0.0323749
Survivors	Comamonas	0
Survivors	Comamonas	0.000255211
Survivors	Comamonas	0.00813787
Survivors	Comamonas	0.049104
Survivors	Comamonas	0.00015824
Survivors	Comamonas	0.000303122
Survivors	Comamonas	0
Survivors	Comamonas	0.00030689
Survivors	Comamonas	0.0304569
Survivors	Comamonas	0.015272
Survivors	Comamonas	0.0644372
Survivors	Comamonas	0.0342
Survivors	Comamonas	0.0387829
Survivors	Comamonas	0.000505902
Survivors	Comamonas	0.029401
Survivors	Comamonas	0.0171724
Survivors	Comamonas	0.0276806
Survivors	Comamonas	0.0463561
Survivors	Comamonas	0.031957
Survivors	Comamonas	0.0447892
Survivors	Comamonas	0.062201
Survivors	Comamonas	0.0212836
Survivors	Comamonas	0.0303715
Survivors	Comamonas	0.00986752
Survivors	Comamonas	0.0176082
Survivors	Comamonas	0.100179
Survivors	Comamonas	0.0558841
Survivors	Comamonas	0
Survivors	Comamonas	0.043882
Survivors	Comamonas	0.000218269
Survivors	Comamonas	0.0752265
Survivors	Acinetobacter	0
Survivors	Acinetobacter	0.00832266
Survivors	Acinetobacter	0.0266326
Survivors	Acinetobacter	0.0414019
Survivors	Acinetobacter	0.0121951
Survivors	Acinetobacter	0.00904317
Survivors	Acinetobacter	0.0726841
Survivors	Acinetobacter	0.0117988
Survivors	Acinetobacter	0.00953196
Survivors	Acinetobacter	0.025031
Survivors	Acinetobacter	0
Survivors	Acinetobacter	0.00836418
Survivors	Acinetobacter	0.00386567
Survivors	Acinetobacter	0
Survivors	Acinetobacter	0
Survivors	Acinetobacter	0.0218954
Survivors	Acinetobacter	0
Survivors	Acinetobacter	0
Survivors	Acinetobacter	0
Survivors	Acinetobacter	0
Survivors	Acinetobacter	0.0086727
Survivors	Acinetobacter	0
Survivors	Acinetobacter	0.0170907
Survivors	Acinetobacter	0.0651261
Survivors	Acinetobacter	0
Survivors	Acinetobacter	0
Survivors	Acinetobacter	0.0226061
Survivors	Acinetobacter	0.0731601
Survivors	Acinetobacter	0.000195886
Survivors	Acinetobacter	0
Survivors	Acinetobacter	0
Survivors	Acinetobacter	0.0205054
Survivors	Acinetobacter	0.00514359
Survivors	Acinetobacter	0
Survivors	Acinetobacter	0.0658698
Survivors	Acinetobacter	0.0182825
Survivors	Acinetobacter	0
Survivors	Acinetobacter	0
Survivors	Acinetobacter	0
Survivors	Acinetobacter	0.0310337
Survivors	Acinetobacter	0.0245552
Survivors	Acinetobacter	0.0171982
Survivors	Acinetobacter	0.0698529
Survivors	Acinetobacter	0.0702655
Survivors	Acinetobacter	0.014523
Survivors	Acinetobacter	0
Survivors	Acinetobacter	0.00193879
Survivors	Acinetobacter	0.0367434
Survivors	Acinetobacter	0.0150506
Survivors	Acinetobacter	0
Survivors	Acinetobacter	0.323586
Survivors	Acinetobacter	0
Survivors	Acinetobacter	0.000257489
Survivors	Acinetobacter	0.00136867
Survivors	Acinetobacter	0.00099817
Survivors	Acinetobacter	0
Survivors	Acinetobacter	0
Survivors	Acinetobacter	0.0798699
Survivors	Acinetobacter	0.0021343
Survivors	Acinetobacter	0
Survivors	Acinetobacter	0.00136013
Survivors	Acinetobacter	0.064635
Survivors	Acinetobacter	0
Survivors	Acinetobacter	0.00944857
Survivors	Acinetobacter	0.0157999
Survivors	Acinetobacter	0.0105192
Survivors	Acinetobacter	0.000203273
Survivors	Acinetobacter	0.00160498
Survivors	Acinetobacter	0.0256931
Survivors	Acinetobacter	0.000693842
Survivors	Acinetobacter	0
Survivors	Acinetobacter	0.0316982
Survivors	Acinetobacter	0
Survivors	Acinetobacter	0.011917
Survivors	Acinetobacter	0.00638026
Survivors	Acinetobacter	0
Survivors	Acinetobacter	0
Survivors	Acinetobacter	0.112667
Survivors	Acinetobacter	0.000454683
Survivors	Acinetobacter	0.000652231
Survivors	Acinetobacter	0
Survivors	Acinetobacter	0.000247617
Survivors	Acinetobacter	0.001909
Survivors	Acinetobacter	0
Survivors	Acinetobacter	0.0251265
Survivors	Acinetobacter	0
Survivors	Acinetobacter	0
Survivors	Acinetobacter	0.0167134
Survivors	Acinetobacter	0
Survivors	Acinetobacter	0
Survivors	Acinetobacter	0
Survivors	Acinetobacter	0
Survivors	Acinetobacter	0.0552764
Survivors	Acinetobacter	0.000546822
Survivors	Acinetobacter	0
Survivors	Acinetobacter	0
Survivors	Acinetobacter	0.147921
Survivors	Acinetobacter	0.00146735
Survivors	Acinetobacter	0
Survivors	Acinetobacter	0.0234158
Survivors	Acinetobacter	0.0266363
Survivors	Acinetobacter	0.0149768
Survivors	Acinetobacter	0
Survivors	Acinetobacter	0.000476872
Survivors	Mycobacterium	0
Survivors	Mycobacterium	0.00128041
Survivors	Mycobacterium	0
Survivors	Mycobacterium	0
Survivors	Mycobacterium	0
Survivors	Mycobacterium	0
Survivors	Mycobacterium	0
Survivors	Mycobacterium	0
Survivors	Mycobacterium	0
Survivors	Mycobacterium	0
Survivors	Mycobacterium	0
Survivors	Mycobacterium	0
Survivors	Mycobacterium	0
Survivors	Mycobacterium	0
Survivors	Mycobacterium	0
Survivors	Mycobacterium	0
Survivors	Mycobacterium	0
Survivors	Mycobacterium	0
Survivors	Mycobacterium	0
Survivors	Mycobacterium	0
Survivors	Mycobacterium	0
Survivors	Mycobacterium	0.06258
Survivors	Mycobacterium	0
Survivors	Mycobacterium	0
Survivors	Mycobacterium	0
Survivors	Mycobacterium	0
Survivors	Mycobacterium	0
Survivors	Mycobacterium	0
Survivors	Mycobacterium	0
Survivors	Mycobacterium	0
Survivors	Mycobacterium	0
Survivors	Mycobacterium	0.000359745
Survivors	Mycobacterium	0.0168238
Survivors	Mycobacterium	0
Survivors	Mycobacterium	0
Survivors	Mycobacterium	0
Survivors	Mycobacterium	0
Survivors	Mycobacterium	0
Survivors	Mycobacterium	0
Survivors	Mycobacterium	0
Survivors	Mycobacterium	0.000237248
Survivors	Mycobacterium	0
Survivors	Mycobacterium	0
Survivors	Mycobacterium	0
Survivors	Mycobacterium	0
Survivors	Mycobacterium	0
Survivors	Mycobacterium	0.0650879
Survivors	Mycobacterium	0
Survivors	Mycobacterium	0
Survivors	Mycobacterium	0
Survivors	Mycobacterium	0.000479386
Survivors	Mycobacterium	0
Survivors	Mycobacterium	0
Survivors	Mycobacterium	0.00149309
Survivors	Mycobacterium	0.00149726
Survivors	Mycobacterium	0
Survivors	Mycobacterium	0
Survivors	Mycobacterium	0.000282725
Survivors	Mycobacterium	0
Survivors	Mycobacterium	0
Survivors	Mycobacterium	0
Survivors	Mycobacterium	0
Survivors	Mycobacterium	0.00470943
Survivors	Mycobacterium	0.0133209
Survivors	Mycobacterium	0
Survivors	Mycobacterium	0
Survivors	Mycobacterium	0
Survivors	Mycobacterium	0
Survivors	Mycobacterium	0
Survivors	Mycobacterium	0
Survivors	Mycobacterium	0
Survivors	Mycobacterium	0.000286862
Survivors	Mycobacterium	0.00159744
Survivors	Mycobacterium	0
Survivors	Mycobacterium	0
Survivors	Mycobacterium	0.000478698
Survivors	Mycobacterium	0
Survivors	Mycobacterium	0
Survivors	Mycobacterium	0
Survivors	Mycobacterium	0.00691364
Survivors	Mycobacterium	0
Survivors	Mycobacterium	0
Survivors	Mycobacterium	0.0354757
Survivors	Mycobacterium	0
Survivors	Mycobacterium	0
Survivors	Mycobacterium	0.0143409
Survivors	Mycobacterium	0
Survivors	Mycobacterium	0.000609979
Survivors	Mycobacterium	0
Survivors	Mycobacterium	0
Survivors	Mycobacterium	0.000234714
Survivors	Mycobacterium	0.00395928
Survivors	Mycobacterium	0.000327726
Survivors	Mycobacterium	0.00369105
Survivors	Mycobacterium	0.000329128
Survivors	Mycobacterium	0
Survivors	Mycobacterium	0.000182732
Survivors	Mycobacterium	0
Survivors	Mycobacterium	0
Survivors	Mycobacterium	0
Survivors	Mycobacterium	0.000227661
Survivors	Mycobacterium	0.000299536
Survivors	Mycobacterium	0.00982211
Survivors	Mycobacterium	0.00059609
Survivors	Variovorax	0.05
Survivors	Variovorax	0.00140845
Survivors	Variovorax	0.00571772
Survivors	Variovorax	0.0192662
Survivors	Variovorax	0.0106707
Survivors	Variovorax	0.013273
Survivors	Variovorax	0
Survivors	Variovorax	0.0160285
Survivors	Variovorax	0
Survivors	Variovorax	0.00459933
Survivors	Variovorax	0.0293515
Survivors	Variovorax	0.0101467
Survivors	Variovorax	0
Survivors	Variovorax	0
Survivors	Variovorax	0.0241087
Survivors	Variovorax	0.0104424
Survivors	Variovorax	0
Survivors	Variovorax	0.00441501
Survivors	Variovorax	0.000355787
Survivors	Variovorax	0
Survivors	Variovorax	0
Survivors	Variovorax	0.0143332
Survivors	Variovorax	0
Survivors	Variovorax	0.0239173
Survivors	Variovorax	0.014868
Survivors	Variovorax	0.0267589
Survivors	Variovorax	0.000213265
Survivors	Variovorax	0.0554408
Survivors	Variovorax	0.00842311
Survivors	Variovorax	0.00445338
Survivors	Variovorax	0.0372346
Survivors	Variovorax	0
Survivors	Variovorax	0.0092156
Survivors	Variovorax	0
Survivors	Variovorax	0.0528993
Survivors	Variovorax	0.0290305
Survivors	Variovorax	0
Survivors	Variovorax	0
Survivors	Variovorax	0
Survivors	Variovorax	0.0241133
Survivors	Variovorax	0
Survivors	Variovorax	0.0142369
Survivors	Variovorax	0.0100806
Survivors	Variovorax	0.0352061
Survivors	Variovorax	0.0159156
Survivors	Variovorax	0.000409836
Survivors	Variovorax	0.0203573
Survivors	Variovorax	0.0317122
Survivors	Variovorax	0.017888
Survivors	Variovorax	0.000495602
Survivors	Variovorax	0.00802972
Survivors	Variovorax	0.0420456
Survivors	Variovorax	0.00746717
Survivors	Variovorax	0.0227697
Survivors	Variovorax	0.0321078
Survivors	Variovorax	0.0171359
Survivors	Variovorax	0.0145967
[truncated: 351 more rows]

## Sheet: fig4a
Treatment	Shannon	InverseSimpson	pd
Survivor	3.60433	16.1192	10.1904
Survivor	3.31073	13.9496	9.4907
Survivor	3.18639	11.1337	9.70229
Dead	3.64815	15.5812	10.414
Dead	3.34837	14.0887	9.22557
HIV	3.5827	14.5845	11.7573
Dead	3.52991	15.5667	9.19752
Dead	3.35197	20.9272	8.66922
Dead	3.00782	8.43336	10.3733
Dead	3.27757	9.84418	11.5042
Dead	3.46771	18.2903	10.1637
Dead	3.33729	12.7484	10.8244
Survivor	3.26182	15.2941	5.87816
Survivor	3.75369	17.0226	11.2639
Dead	3.39007	14.1593	9.92155
Dead	3.29594	14.6381	6.87687
Dead	3.78464	28.3419	9.15931
Survivor	3.47925	19.112	7.94495
Dead	3.78235	21.3371	10.6911
Dead	3.78916	23.0934	11.3991
Dead	3.49447	19.2912	8.11503
Survivor	3.45346	11.4351	9.90221
Survivor	3.75407	16.3024	12.3549
Survivor	4.06327	21.6876	13.3823
Survivor	3.27711	13.9973	7.30485
Survivor	3.40256	13.2102	8.96749
Dead	3.24112	19.3463	6.66462
Dead	3.63801	20.0541	10.7552
Survivor	3.52541	18.9667	9.60489
Survivor	3.62672	19.8828	8.99637
Dead	2.40237	4.86467	9.3482
Dead	2.9365	10.8818	6.2127
Dead	2.92173	10.8183	8.42833
Survivor	3.53163	23.3615	9.85401
HIV	2.71486	9.84734	4.70035
Dead	3.51188	19.8883	7.98795
Survivor	3.35984	14.7303	11.0924
Survivor	3.44433	15.5634	8.33864
Dead	3.1808	11.1804	12.6604
Dead	3.18819	10.5245	8.45478
Survivor	1.41989	2.61581	7.69729
HIV	3.31825	14.3433	9.7271
Survivor	3.25955	14.912	7.49344
Dead	3.28566	10.2877	10.7193
Dead	3.87159	24.6992	11.6208
Dead	3.20393	17.408	8.21372
Survivor	3.90264	24.1733	12.4861
Survivor	3.38594	17.9738	6.93855
HIV	3.54287	13.1638	11.0588
Dead	3.67318	22.8867	11.0915
Survivor	3.47998	11.9538	9.53827
Dead	3.70087	23.1718	10.074
Survivor	3.51402	11.4221	11.8998
Survivor	3.33138	14.2282	8.63931
Dead	3.58314	21.5385	11.1052
Dead	3.56501	20.7469	8.9964
HIV	3.61238	27.2985	7.94085
Survivor	3.60943	20.0311	10.6024
Survivor	4.18528	38.1536	11.8937
Survivor	2.93751	14.6313	5.31223
Survivor	3.60312	25.504	9.17284
Survivor	3.69236	29.212	10.126
Dead	1.82383	2.3772	9.16266
Dead	3.46103	15.4695	10.2915
Survivor	3.39477	10.8041	11.6949
Survivor	3.35182	16.6238	6.24505
Survivor	3.6447	14.4851	10.2185
Survivor	3.32698	18.5469	8.28208
Survivor	3.22475	14.1724	7.39785
Dead	3.62	25.1005	10.5605
Dead	3.49913	14.4682	12.4096
Survivor	3.25913	15.1027	8.64651
HIV	3.30284	14.2717	9.1797
Dead	3.36516	16.8456	8.07631
Survivor	3.17965	14.0833	7.72079
Survivor	3.80685	21.5343	9.78066
Survivor	3.60546	17.0137	9.71143
Dead	3.29547	10.7533	9.79444
Dead	3.19541	11.2065	7.37585
Dead	3.67506	15.5882	11.9852
Dead	3.27347	14.1428	7.35892
Survivor	3.77989	13.3761	12.4534
Survivor	3.32943	15.42	7.25126
Survivor	3.89201	16.083	11.5613
Survivor	3.33014	12.5931	10.0077
Dead	3.36874	14.7066	9.98449
Survivor	3.25764	16.4928	7.13652
Survivor	3.15758	14.8493	7.86156
Survivor	3.68713	20.7469	9.9239
Survivor	3.35729	11.3533	7.84497
Dead	3.57038	13.4804	10.734
Survivor	3.34688	19.529	6.04332
Survivor	3.85911	21.56	11.9971
Dead	3.42611	16.3514	8.37053
Dead	3.41248	11.6466	10.7299
Dead	2.92348	12.1854	6.2161
Dead	3.03633	8.70596	8.60955
Dead	3.54603	16.2864	10.1116
HIV	3.40989	18.0812	8.686
Dead	3.63273	14.2731	10.2562
Dead	3.15447	8.80506	10.4546
Survivor	3.52699	23.6102	9.04621
Survivor	3.33464	15.6955	7.55863
Dead	3.94404	22.8936	11.7533
Dead	3.66856	20.1201	7.61233
Survivor	3.51932	17.277	9.15049
Survivor	3.40282	14.4831	10.4834
Survivor	3.49623	16.9008	7.9406
Dead	3.20914	16.3014	8.53322
Survivor	3.50278	14.3321	10.8416
Dead	3.5678	23.4214	8.30269
Dead	3.54116	17.9628	9.96727
Dead	3.89883	22.1547	11.8311
Dead	3.28108	13.9848	7.31754
Dead	3.82615	21.8596	12.4976
Survivor	3.59399	13.8567	11.6273
Survivor	3.60667	20.7509	9.52414
Survivor	3.29928	20.3596	7.16262
Dead	3.70362	22.573	10.3171
Survivor	3.50178	21.6332	9.22059
Dead	3.43904	14.551	12.2924
Survivor	3.4776	12.6184	10.9252
Dead	3.71707	18.6812	10.7361
Dead	3.51084	19.2467	8.28812
Dead	3.40852	15.0908	10.5081
HIV	2.88093	9.72266	5.4728
Dead	3.4255	20.6632	7.7483
Dead	3.15634	10.8963	9.11471
Dead	3.39018	13.1315	10.1107
Dead	3.69294	27.526	10.2104
Dead	3.72887	16.7516	11.899
Survivor	3.33628	12.5231	8.65965
Survivor	2.06911	3.83834	8.78379
Survivor	3.32576	9.15723	9.68696
Survivor	3.31299	17.7132	6.25603
Survivor	3.30135	9.8196	10.0642
Dead	3.44577	14.2767	9.38159
HIV	3.39451	16.9695	9.00736
Dead	3.49193	24.6465	6.2956
Dead	3.37176	13.5473	10.7749
Survivor	3.4457	15.901	9.59941
Dead	3.46639	14.154	10.1659
Survivor	3.34661	15.4562	11.1879
Dead	3.47703	18.9346	10.2335
Survivor	3.63059	22.9321	8.75451
Survivor	3.69859	14.7325	12.2775
HIV	3.43025	20.201	9.06132
Dead	4.35813	45.7415	13.4861
Dead	3.32009	14.0427	9.48836
Dead	3.41768	16.412	9.51664
Dead	3.53993	16.9309	10.1622
Survivor	3.58568	12.0588	11.4585
Survivor	3.65831	24.0628	11.2835
Dead	3.71655	16.2007	12.4535
Survivor	3.21384	13.3763	9.46757
Survivor	3.47236	22.152	7.56397
Survivor	3.63745	13.7637	10.2722
Survivor	3.4649	22.6889	8.51851
HIV	2.95827	16.584	7.91887
Dead	3.67341	24.451	9.94325
Dead	3.59716	10.597	11.2885
Dead	3.39873	11.8183	9.65171
Dead	3.29663	11.2055	7.5947
Survivor	3.36596	15.0319	8.03976
Dead	3.42758	19.7668	7.50349
HIV	2.7964	12.9968	5.6577
Survivor	3.24929	10.47	8.45946
Dead	3.55406	20.648	9.90678
Survivor	3.61254	14.1702	11.293
HIV	3.33379	16.6	9.7854
Survivor	3.52777	18.853	10.3385
Dead	3.33262	16.2949	9.25384
Survivor	3.87774	24.0403	10.3092
Survivor	3.46056	14.0386	13.3063
Dead	3.66433	17.5228	12.0572
Dead	3.52874	17.2331	10.6037
Dead	3.48643	22.4704	8.33444
Dead	3.72945	25.3633	10.5801
HIV	3.57328	20.9849	11.4147
Dead	3.23342	14.0553	9.50412
Dead	3.83942	27.0059	9.64979
HIV	2.81354	8.88052	7.58715
Survivor	3.49687	13.9869	9.03777
Survivor	3.57609	13.0685	9.54869
Dead	3.43169	20.0761	8.23761
Dead	3.75501	15.2194	11.2126
Dead	3.68246	24.5842	10.9535
Dead	3.89015	26.2929	11.3189
Survivor	3.21105	14.6117	8.10012
Survivor	3.19285	10.8769	8.00787
Dead	3.41005	20.9688	7.7036
Survivor	3.38579	19.6312	8.21698
Survivor	2.76822	12.5966	5.59365
HIV	2.90475	7.18625	8.64858
Survivor	3.76181	25.8014	9.7454
Dead	3.25976	13.1634	7.94255
Survivor	3.38655	13.1932	10.1919
Survivor	2.97076	7.84073	8.43773
Survivor	3.6456	19.6784	11.851
Dead	3.54641	17.272	10.7706
Survivor	2.79887	7.63487	7.44916
HIV	3.53308	17.5448	7.96093
Survivor	3.23956	12.9356	8.52142
Survivor	3.35241	12.7281	9.25281
Dead	3.48289	12.6913	11.8514
Survivor	0.910712	1.43104	8.30508
HIV	3.31782	14.9307	10.3896
Survivor	3.64102	17.8771	10.0149
Dead	3.25415	12.9033	10.6071
Survivor	3.30191	11.6089	9.02328
Dead	3.19715	12.7184	9.28391
Survivor	3.31054	15.0611	6.28905
Survivor	3.47134	18.3135	8.6078
Dead	3.32258	14.0222	9.49825
Survivor	3.75224	17.2462	11.3289
Dead	3.33423	19.3375	9.38049
Dead	3.39908	13.0997	10.5454
Dead	3.53962	16.1106	10.1767
Dead	3.03357	11.5449	9.32218
Survivor	3.605	19.9517	12.5043
Dead	3.40234	15.0642	9.17083
Survivor	3.49118	14.7524	8.74667
Dead	2.00875	2.59594	8.02712
Survivor	2.98264	13.9765	8.32538
HIV	3.18405	11.813	6.82604
Survivor	3.24849	12.6635	8.11138
Survivor	3.46458	16.9202	9.85542
Dead	3.7867	21.7522	11.4011
Survivor	3.55995	23.472	7.92143
Dead	3.05832	10.9807	7.98672
Dead	3.20866	11.7883	8.74215
Dead	3.98756	20.5936	14.1043
Dead	3.94105	24.398	12.0568
Dead	3.206	14.4261	8.75614
HIV	3.15008	14.8384	5.96115

## Sheet: fig4b
name	Dead	HIV	Survivor
X986c42c2fc47647632f0cf5963997f2b	113	0	0
X634939f86ffb7e1d6fd5e3b1c6c516b6	133	0	0
d38e585a506c92a210f5b171fe1ab253	0	0	209
X04f8696c9d14c95448aea624fb157286	0	0	210
fed6367b0ed4c49521e0e9f7d5bd7383	56	0	0
X222f5b46b11fa840b3cb18afb4e21677	0	0	85
d886552d24dfb144ad3c592175fe2fe2	0	0	113
X989a5e4f87befe1d1b40252b4c0958b7	0	0	17
X9e0ca758f31eefc400878a042ed996dd	154	0	0
X68b06c1def2605411fedec45d5858f23	70	0	0
X50d4d8abb4d53395e0367c23f30041e0	485	0	510
X973b920f769cf6d40a07ba216b05b122	2	0	250
X856a0169a2b36739a02170c78b2ea645	209	132	53
X7ab95a9125003f62056b9a8cdf11627a	0	0	82
X3014a7ef46b5289c3bcfa78a111b4786	190	0	187
eefab440db2a7b1cbd2ed73ac3c62799	497	0	0
b812005aa6e84c8f77c45b9aae3d7ad0	0	0	69
X1d930004074102d0048ed5bfbd3804e7	0	0	19
X1d4aa7d1a0df7781b42a8dc1a2fbc92c	83	0	0
X41baced600cf0afdfb1a6b0cfaf736ab	5	186	125
X7382e28fa90a930d8b45ac1ae74cefba	0	0	73
b6642d256244aeb98837196b1b267409	23	0	0
a93ba27709782fe1a40ab75bbc9dbe6b	119	0	0
c7071c4dbeee6bbc806a9125ec4014d6	0	0	36
X23ace1bdf3517c2aae194eb33c5d3f62	0	0	131
X8f32bbb883e5a5f7d23b1b16a70847a4	70	0	0
a3c48f2799fd41dcd581ccf3742bfe0d	0	0	143
f13d16b6385b790232b4f66c97ceab76	0	0	108
X74a86e4ab97acb1f6e3429a5d1c02533	21	0	0
ad58bc74f40958f5e14e07016487e52c	0	174	0
eba16858028a1a7fca599ecf2bcdcca4	2211	191	2995
X4d94f09631551b6cd0cd2ddf2da5724e	103	0	27
X34987f12f9b896f9fe1cf66de7e14b00	211	0	223
X87cc0a8689c05871716209f5049d8e9a	0	16	0
dda76bd5c9fc8712acdbd2bcb1283041	123	0	0
a8a57be4340182be768b4bde1cf81a0b	0	0	39
f01c2798833d5c188951f4224b0ca501	80	0	0
X10b06a7405592aeeb4e2cb02a1ac60a5	286	0	0
aa978bb642b7f4ea58cd1d6b7a68f977	805	0	0
a6780d8aa87033b1337275f838e48181	72	0	273
cd12e6a9b65d1c43a6ec4de91be435a2	0	0	14
e3fc6c22f93c1eb14f4bc68fd84c969e	23	0	237
X06625800148eb408bc48cd20d9382ca0	0	0	27
d3b7e474e34fb686a935c4e952b1f42f	38	0	0
X94e5eaca3b01db9b03da201195e95123	2	0	43
X52c2453daab025a68119ca6227cdb325	0	0	35
b97bc2b220d1032cd3eb702996cea2da	0	0	80
d0b72423600a36bdcc6f34da332178f5	0	0	16
X8bcb3367342cf69965f36e3ac44deba5	105	0	0
X80ed9835bea2f0047bd5df62e58fe7c9	0	0	75
X8dff906fe0691c81448a4588eefdaf5c	222	0	0
X9777f308988baa7e8665ce15c7ad4460	117	0	76
c1223d444bb04bedc083a7755403b2ee	0	0	77
feaf7f4846abefab21e7c9088276d15e	13	0	0
X1efd1318c8e5539ed64abecef04957c4	185	0	0
X4131b53ef2f7c8277f8c3f8be7a0285c	101	0	0
X2ca08e84951bf87cec34a6e4def58660	53	0	0
e40f69db1527afdd65aa22909213d0e5	49	0	0
X9511c337eda9134bd26acc9a44fc48dd	177	0	0
X5ad17d816e4886d5c01533e59b2bc44f	14349	3365	13964
X6c630a4d1e0817a187518df815f375ba	0	0	86
d4b9b69d7f5c8b664d2cebab471b07e2	0	0	104
X9b4c47fc113cf6c4c51a6ea967f29707	0	0	101
e98f6c2e117ec9ff06402b88bf205f69	0	0	24
a02deefc21076d105440019ffb20e255	19	0	0
X532f96b6eb1033673f9a8b070cdf56fc	269	0	0
X3149a851bac6bbfeb71e0b5515dc5040	0	0	56
a88684ad5e512fbd7299f7d7141cea36	231	0	0
X69a28c8227074ba8ca80035a4e7bf306	0	0	46
X11cfca1f04da1bc6e7869bc3f0ec7e7b	232	0	688
decfd2fb06deb5a33a927a470e2ccf1d	36	0	0
b8b6baad34138ac1ce6fd1a5ccf62785	61	0	0
c615eb01b7f6cb85a279b9ecda103aa7	908	148	272
ed9ac90a75e84880014a99ad2130e002	611	193	168
X44d1ca8e5412942ae3403563f3c9dd85	0	158	0
a26827b50489f739008447ca61ce4497	0	0	29
X639fdc112facec0e0643508709340a2a	0	0	31
dbb6c946edb2cdb77b443a69ad702e9f	41	0	0
X45776c5b23ec0f10d0cea78f9d15defe	28	0	0
X700a4d102eeac71d93915d2a3ee4f0f4	0	0	116
X19bcb3e581e142f86305b069f8c12048	0	0	98
X2c27843732f972f4ada3254404d448f1	0	104	0
X80bf7c39053278131d1af7d03266cb12	60	0	0
X8967911c6cea15b42fffa39e4611b5c3	170	0	110
X136d99551b897be303f6802fcd4ea9b2	28	0	0
X5a5f49d2668750a6a0d1bf87851f1930	329	151	0
X00da9418643becd39716ad184ecc6c1f	3	0	189
a5970a35a58e0ca9cc3e195aa0355a2f	27	0	97
X0f473141d73e0f8631d1b1fae38b1ade	11	0	0
a894df70b0d6a1a32f6410861d404f98	0	0	28
X91fd3ee85ed3481464c8af7bde661e00	0	0	75
X1f88ab2c111cdc5b8f8822f0f76580f0	176	0	0
f1387fc2617bd0431ffeeddadf338a94	13	0	0
X1b139c84c5bf9d2de0baa29ae8d851e4	0	0	100
X562f9033fd8dde4cd39369c7c41a8e5a	189	0	2
f1d0e5081b20a56161428b7ea110150d	415	18	21
ef59e41f7d8bcd7aabf2580d85475945	49	0	0
X60e47de34a35aba1b67f33f4f6992f34	175	0	2
fb5e608baaae76f598adbc76e9ec129a	2	0	307
X774c2ecadf9ccf6f79dd3b76ce10dd05	141	153	98
a222c3dbc450e40fa567fae3b84d4439	44	0	0
X828a62e87aed690db0a5b3c34723378c	97	0	89
eb896d21fc945d65786e48d4acf98ba5	1	0	224
fb806541ad795f7fc7567dff95cb02f6	281	0	0
c6bbf16051c77dd7b8f25f4870c765a9	32	0	0
ec28eed7497b7ae67435ba4dcd49cabc	42	0	0
X2a34e62c1e2c4bcb549b0fdac441088e	722	134	448
X87827cc81470207dc484dc212dfb75b5	33	0	0
ea48398d0777b4a084e5889cf655ea0d	0	0	50
a5e1c3483e85115ea97267a6d8a3f4d5	0	0	15
b5cf87915f698838a779e79ae2f39576	151	0	0
X95f410631ba3a8a34a661cc2a3255631	45	0	0
X6e47a330e108ded2c70ac1978b57e590	510	2	260
X48e6a36d61e5bfb141775fe8dd338a9b	139	0	2
X89c1829b4e78e8be70b328a4da57af28	20	0	140
X342a5eabbcd055dc6d53f23a3b5f19b5	0	0	15
b037cea5c4bb84e36727017bf6434fc4	134	0	0
X56b1d3d1081346cfe8859ce1e95f512d	19	0	0
X08b46b04336888978f24e3464f0ec422	97	0	59
f0a057cdd73a43942b8ff1504d953671	0	0	89
cb24831491c0edb1ed5e5354ef39a5b7	2	0	84
X57553fe6c4b8acf3a40c6079f5c08784	0	0	28
fc3662dc94a25ab0a4d51b4245dcda7b	0	0	24
X29025aa38a72ce51aca64cf0d49af74d	0	0	16
fc6d2419f42246fd50cc8563a06edf1a	127	0	0
ddb9fc997c3f5d4c69618e0a4ab3878f	137	0	0
ced5f8633473c32621b796a3387100dd	11	0	0
X89c166bebe6709b9eef47355e22d5de6	112	0	0
X054ae061410fe875f35244cf5b5f4754	60	0	58
X31ed60bdf5c73b973f85c1419285f5bb	0	0	87
X05dc96f2248c49555089e60b977c8b44	174	39	66
X2ee06af3e03e79b9a3056a890a919440	47	0	236
dc7357d9b4b6dc5f4503a9eda4d369ff	0	0	10
X127e3985243003940326bd895b1bc613	48	0	0
X124b4eebd8d6039e2dfaa57ec46a5b11	137	0	114
X1a10db834f7afd7b66eaa7601737fcf9	39	0	92
a1b0b0cc4450ce21f69b30b9d89ea726	0	0	19
X478b90756bc0ae84dc2482cc388925c2	79	0	0
X4da039df87ef638616fa0d3acc379a96	85	0	166
X5811600eed83781612f4bd9cf8950bcc	182	0	128
X1a0df0461c0afd5adb3b16d712898aa6	5	0	254
X2bb2e0351a3ccc6292252c7817f6364b	0	0	31
ef75137a24355726e64b31b9bedc7d71	225	0	265
X14d3ef2452e91ec189073659933134b6	90	0	0
X4b801f198eb90012979c5a00eb4d47ec	95	0	0
bf327e6a4e7b0b9c15387a4460cf2d6c	0	229	0
X08b25367f22dd31c06c01d76ceccf959	19	0	81
ebeaa94502962285d83d4b0b13cd66df	0	0	172
X472e69620d5fe997a483dcf86eebc0f1	243	98	148
e39653b48101eee75f55089390ee4f49	127	0	76
X32d85d6025f03bf75721e540bfce1a77	0	0	190
X7b4d98f1fb31e6499adb68e977cc166d	55	0	0
X0022d8ffea2e1259be8de9bc8c7498bc	251	220	88
X004fd5b42a298b977e534bf5d01fe805	273	0	150
fe866c59ac33c0ef7a8fc618a5e9f7af	922	476	571
X351652bd8016fe3c9f5953d95b8399d2	92	0	0
X97aee33cfeb072997a3f821cb9dd05dd	0	0	17
X140b4628d5baa4811b60b77295c547e5	0	0	11
c61d46280e0836d5e0fbd6ca6084267d	1013	0	762
b4ff17d221f758652d4a9f1d0c51f97c	186	0	12
d889ce662e848feec47b650392350daf	0	0	77
ae73b083b4753b485f35e910fc88418c	37	0	0
dd136ece8bf98195cb1d7b7287a17cf5	0	0	16
X665d9f02c7b992af64e2aeca0d777fa8	41	0	0
f219d15008976c445d5066161a63329c	0	0	66
X8485872ced6c3649789fb7a4c145f6d8	0	87	0
cb8a04cb4ff59f99b56d1bca1d521e17	1753	141	1532
X85a45866e5997064f572d45511cbb52d	239	35	116
c9d8bd7858cf44a59f132cdbbbf08b6f	0	25	0
X976fb61c3051052c101f30cc225e1702	0	19	0
a908cd3851f34d6e26b510f57e6e9650	0	0	152
X89e6c55a98920becb229b0ea84667165	108	0	0
f5619137ff2cf21cab8406250f8d3a69	0	0	133
bea18db59d7043ba84876513df822b24	0	0	59
c327086042221f67c517b8249691bd85	802	0	825
X67049f270ebe15be6382e22e004f3cd4	0	0	142
X6f27ff002fb26c368d931f7997005fe0	79	0	0
X090b907c82a96d8757e3b5ba4aa5c1ac	32	0	0
fede049dbac2787ff1d536ca334f1e31	49	0	0
X5148a4183baaa96f6cabc8c7fa5c3f0f	30	0	0
X08c31458119d4c7f24b76b012b0c2a16	84	0	0
X5ebe5ebec06e703babed414919931d62	0	0	13
X7ecd78868ea80c50b0619d323d1cc016	0	0	130
X9e834f426052439505a8027e31ba4f31	0	82	0
X671d6eddd9d38ddf840c926ae89a14d8	1041	181	1693
X4133932f145ab616d0ea0ed131aad318	0	0	42
X8a07046754674c0a2b77dd63ca57b581	284	0	0
X7469fa4bf025ff4fb2a678f9d860bcb3	100	0	0
X5827bb1312ca3901f7f995742905b856	0	0	165
X19bec2b9eb9386890fba74ec873ca327	52	0	0
X20f8febaee0bc63d4062e45120a09030	0	0	162
X57fc0f5a12c11f65a6de8c7d68056f68	0	0	43
ffcfd1d7f0b40ea7c1ed2613b744aad7	0	0	11
X5a359b6fe46cdf90783cc8be8e1b1f42	91	0	34
X66cf5a9dcd925aac247794cc56309572	72	0	0
X607255c697243303dadb86cfe6b10a7a	58	0	30
X8785efc0ada050eaa7538a6defab1f4c	0	102	0
X9e38a609669d4bdb897a55ddd4f4d45c	0	0	15
X52d6e80f8de1b7a0e667df1fb9dd1cbb	146	68	336
X522f7901ddacf86dfcc751f9dc62e347	0	228	0
ebbf2262477e6a861307b39a24102215	2988	366	2498
c3df13826873bb12509f46f052c88016	136	0	0
X00aad4dab8faae30d605829f795de1fd	113	0	0
fc8e160335a1bf2936dbf64b2b47fc87	38	0	0
e6ac1301cad3694127d041e1e743c103	0	0	110
X1e815604683042ad585c4c751b9a13eb	0	0	105
X42624e4212a47b46ac86ccc6934f7b9b	45	0	0
X25ca42b43e55960b247d6db6a1a0ea0b	21	0	0
f38a63bd9e7af08ca8ab44d68566ed44	72	0	0
dd85173658b1f7da7c5c076dfa32dc66	0	68	0
X7d0b11aab1ba34b9d84d9e94eb32341f	38	0	0
ac4717d918e36a7195ffd47309353148	74	0	118
e7bd8008ae53af1440bcd551b5490ce9	0	0	683
b2e469f4db2310546e951fd57d278bdd	0	2	95
b57aa1bb2923bbc1aa47b2d973dbf8dc	516	0	558
X95eecace96ab6f24a161012cab23df3e	44	0	0
bd7dfce24a0dc61f5c464d30824487a0	44	0	0
X1a70b041fa89df035402ccb60a6b2ae7	80	0	0
d7edab068f0d70bcff8dacea6532d6d9	111	0	64
X752f59012cb1c93d80b88ebfdafe96e8	0	0	20
e2973be9291c767d061cfc7a58f2e7fd	0	0	28
d95e68b01d36ac96336a9ec78c7a92fa	18	0	0
X797d0518f1d7f383df8a10efd839c869	10	0	0
X90d88439abc7a358cb2358d5814e5561	541	0	178
X9371c11983efe45906e694b3391d3ed7	34	0	202
faf090428f2f0d3c45588353bc66c491	18	0	0
ae7151245c7f06eac2fd0bfc19da0994	181	0	0
b871f8a8bdcb10820ee9b77ea17e348a	0	0	95
de33ef22e275e5a0063460dd4daa7bf3	0	0	110
bd76562832d1087139b0babcf6c3ed25	0	211	0
d9805ac53b0a3e49be39d7dde9925ba5	175	0	0
f3b1b259ea6e2c98fe219c502891d0a5	0	2	177
X39a288f0dd24ee8ac76d4c2a896b74f8	33	0	0
f0e84471bd3a5d9fc71969f18a98d2ce	23	0	0
X092aa7444d45e2186a8d2ba4a701c8e0	85	0	0
X83e4e83264c33b8e482b6465238c0436	0	0	103
f3f921bcd9ff4deab8b814e47481a302	35	0	0
X810351229ac3e090edb67bb35f9fa1ac	185	0	82
X15c2d91791f5b06c423ef022a762b99a	18	0	0
X0e1a1e0a120c372457be4c791eaf1cc9	0	0	65
X261657a86a102e9a0186b239ddc3856c	75	0	0
X7fcf8ee46e0aa977c947c8349b0e9435	0	0	331
X290c3916a48204d987c48087a4334cd3	0	0	26
X091f9d666baced2993c4284aa5544d83	1141	0	443
X06e733dfb4b833fc7b10e67f0ed55fbb	189	3	148
X0552e0c8236f88e4961cb351d905c2d4	9	0	51
a597123933c3c65c2c495476309624d1	0	0	123
a0fbed578134dc11111932a37693081f	83	0	0
X8edb8c653b8e926050f28fc8a72fa4ee	0	0	161
X55864aa661944ef9c819f905df0bf668	0	0	125
X3eff97e0fbb173c143568e9211cb785f	0	0	30
cddf006856100763cb440ae73ed57da9	6	0	177
X170bafabb01dd4a131ccdde6b65cb65c	0	0	113
c6acfb6f4d9cfd16adfbbf7705e744d5	49	0	0
X8411b2f4d7f7c24bc7abc8ee8c341763	280	0	89
a71c12e0ea9b89640b9f151647b3f7f9	0	0	62
cb68da51fed9ce0d00494b762439f9b7	428	0	608
X09ee075161aa8ab50b68b82419f5a9a8	0	0	102
X956aa91ef1b5f75d1514b93e96e1e89c	45	79	285
X7ab25f7b17e1a18132be14bd06b97cb1	0	0	178
a86fcd78959ac65a10f3e47dabc924e9	54	0	0
fca65fbdc6856f67c82456f66ea70017	0	0	133
ad09a4aaaf7caba3c3466c8ab53f7a4f	80	0	0
X6103c7f82af30843fa4a3f341e7cd507	129	0	0
X41baf88f615cc65f8741d5a0a14ffa7c	63	0	120
X83e97c4d6daf4a525856fec29753f50f	0	0	51
X6c4dccdf1bd7fe0ccacc28ce65712eaf	300	0	320
X81f7e5287298f14c1fa4b62c4dc81cad	191	3	0
eecbe845eb919b79214f4e81834d459f	261	0	307
d2f6c400e072c3f1f6882c453e4f590d	382	0	61
c6cd1668b120b551c52e73908965915a	231	0	0
a8e563ebe7b6755f9ff8519d07d531c8	0	0	47
X63afbed660b5722fc2d76d838c219047	79	0	0
c4f015caef1c2e7f7fcc9777fdb41ce5	0	0	12
dc1cda433f6f17b0f77671e251485765	46	187	0
X35f1a5b47ea077d70d7c356d88eecebf	0	0	79
X9e5b805ca4befe4f95f704674f640fd2	0	0	43
X18eac18ddfc1c4cca838ff2abc4f76d0	0	0	39
X46582514053c32f9f85d8ac443b3c243	109	0	111
d67c18ec20d3bdbee29210ab76535b09	0	212	0
X991c4433c677ab45cfadb0e225628d6c	496	0	202
X685dd5f322214329528f206885ded0ef	0	0	14
X4858c031b258803a13f1ddc3f98ce4c1	32	0	0
X6db0bcc8172ea63f2bb4619f52950bcc	65	0	0
d42a8151597fbc82c48f7e2375ad4852	170	0	0
X7f6cb90efeb1f9c116f5ac16fd008a26	0	0	118
X48acc26d07ccb38a279cf036c7a33e6a	43	0	0
f4407f78ef757af5df7b349a48169921	245	0	0
ff6fd4e39f7fbaf4b9f9fba213df8f9e	133	2	127
X32afb3519f2da74340526b808ba6f721	0	0	19
X00b1f532f9c86d749c3bd27395741cb0	0	0	43
X5b5436bd51bd736e141e8d46dd9fbc78	13	222	0
d606bb44324a1d7642b24d8d5fb11b87	0	0	69
a319ab6ecf087d7d0897f9eb27c1583f	143	0	2
bc9efcf997916a07e35a54d546a3d5f4	2	0	170
X7b3632812ac63406e7e1399ab8df89b8	112	0	0
X1145729ca4b6703cba18004bf4ebba16	0	0	22
c8380830e11bbc6943ded2311ce5602d	1233	3	638
X6da35adc7b24acb9fd6ae78fcca04642	0	154	0
fb5275e0c8a79b34baeac4fc9ea86aa3	0	0	80
X21cc8a5f34ada02f9959a107a684508e	0	0	18
X6116d69baba0a3efe10e0cf69ae8d8b1	72	0	82
f906506a2098f7fcbd901f5c2a512829	0	0	31
cbbd5dfa1a25effc85c4a1b4df10f760	799	0	43
a8a93506440ecc97506828962f402ff1	171	0	2
X1ab2dea8328b1171f3325006a7581bb9	0	0	64
X22e68d52d081c9f5780aa35304c67c57	110	0	99
X8499d161974632af77bb2fee9b97d0da	138	0	42
d03922b3267daa55f59224923c7c2bfe	0	0	188
X010f9fbe8833faed95b2b7f5a0165908	120	0	0
X2b1e761a8dabfbdbe3b865b883bb7945	112	0	0
X9b79ebcbaa9e592466a1637529ac4167	0	0	161
eeb95d87ff22bb4923f9b73ac58c1e5f	40	0	0
X35caebb60aad90a94f953bc69655b98b	0	0	189
X699a8840e34fa04a3a16824219a536cb	80	0	0
X4dc820931b0582fcbf7071ed44975462	267	0	607
X9eb1bcd1dc4bf87542e15299bf99cba7	0	0	30
c5b157ccfd450e61665e8f4c5de310ff	409	0	3
e6e3e3004f27b3561781af8397289d0c	15	0	0
X3492da2252f7f05e4e07a3c7b9ba400e	0	0	284
X4876c75df7383a7ad050bad45e067051	80	0	139
e2ad0abe197dc4488a99d4660173a89b	73	0	0
f3641be6665df0da490d62cee4bdccf9	16	0	0
X32fac111c88028a8c760c04c7c047449	0	0	101
X91e15465e108fbfb6a8fe5b4ea75214e	0	0	51
ba47536bf0843a8b9f77c11a06a2f2f0	2	0	95
ca5f0a46d3e7318015f76adc562e251a	2	0	179
X3a1d2b0763dabb8a96d4d4ff8ee33356	58	0	0
X61f3132b97fa0b8354448b6d15520750	126	0	0
X0090bbdd8049b8a67db4c3ae979edae3	53	0	0
ad55179333a7b9822d65cb65cc44423d	0	0	79
e647f0204e7b545d2bd783d83706ba58	0	0	14
X037980bb24251aea539011804276e460	247	0	34
X1fb351effcb94e3e716825081fbfddad	0	0	83
cb4ab646402a3fbc2b05e5d8d15f5e9c	0	0	106
e3079823d82f01998cd3d091a98b2571	158	58	422
X7ea06714bc216ed277c882654409271e	0	0	69
b73a6bde8b8cc47541060a9547051ed8	93	0	0
X5d211b58154406ad9f58495c359f4021	0	0	75
X3b70fe633d779030814c003657b5c061	0	0	60
X3c0640d56f542a2d3fb44fe855fb18ca	0	0	10
X9b1bb5ab357672b0d53c0e9005f0f5a7	0	0	99
X8934c92652deb5f065f840fb5f3d35c7	73	0	0
X5d980873ce3cff047a78b61de98b56db	0	38	0
X7fe81c55bfb3968f1441557e49f9dbc1	0	0	99
X89ffb027a919e33df107f926dac780a8	38	0	0
e04125e16e7dd77a812e618891bcb256	16	0	98
c946f42dd7346b1fc89629534fab7cf1	0	0	46
X42f14aa889ad23fd7ce810722a2df389	117	0	0
X9bf86c18a1ae1235a1f8bf4d96901804	131	0	0
c7be1bf6219304dfb995b3e7a2bf3b3a	84	0	0
e3d741bcbd218762199b42d24bf857a3	88	23	0
X32bea0aa3e699d3e7478cd4dc08ff4a5	72	0	0
a4a27b939f1e16e827637f8bb1a9b8be	0	133	0
f53ed5d77a3cfe6bff06ff58316703fd	0	0	157
ebef6a1259bba9f3f0c164ac199e73df	69	0	127
b8c9f76c01ce064d2ecdd8a134ffa9ce	48	0	0
X55f73f875eac37152618a8a03e89d2b0	75	0	0
X77179a96e7cf6aa4138342d49332cb1c	0	84	0
ba745b4e8fb4effbba31bdaabc75380a	0	0	74
X1a6b46d33161a3bd279942cf3a081063	40	0	0
X453f1538704cac3d6a606b56652dd28d	529	0	241
X0d9504afe62d33faa9037ba5c91f3add	74	0	0
ad4dbf1342b27c9aac2bfd7e8a0cbea9	0	0	57
X279b37e926cdc7620eecf7c002ac4c28	0	0	31
X737bc1ec3c82a4535c795efe5498178b	0	0	165
X2b708adacc8989aedab0adcd6bb4cfd6	207	0	2
X477a05e4a102bd3992a9a40a4246a680	0	0	273
a19989c340443b84ee1b073f72be51b6	159	0	0
X8b252896c1db13f11eec93c8760d4114	0	0	23
X5cc5af7c4ce848dd3f5ecc0067329316	41	0	0
X529d55570008b824e4514e94356edda4	92	0	0
X744f3075104b995fc445131b67cbc10c	0	0	90
X4a677034383cfe8ee8dd096e3617592a	104	0	0
f5e3a7082c38253a1b21f80a4a9c8b15	0	0	55
X076d216ac86949ea2022351c9cb9f7a0	133	0	0
X301435e8b31d0eacc120de104c0aea86	48	0	0
X89eff7289fa6ef0bb76419ade09ef029	60	0	0
X10d7e060c3594018f8036e5285ece1b8	0	0	113
fdc6920bac3f45eb5a5aae0ac0ccb089	24	0	0
b796280377741d73359fb458aed892fc	113	0	0
d4cbc3b6c09e437546c22f0845a1dd1b	0	0	161
X16ba8774bbb2c7028e19275e4eee47b0	0	0	28
X717fed87c6eac06579fbafb6905b7c58	2	110	0
bd0d96037384fe45c22787a0a93410d3	0	0	109
b78aedf08c24d82ed30c0a568bba68b9	37	0	0
X653fd700c8fbfc7d969b17d0623b34aa	12	0	0
X0863d63feba9f4300ee54e3e31ece8ca	0	0	54
X90390371e6b502f9486ccd28c210d85e	0	0	97
d6e49398d0d174b1b2edcfcfd89f1d64	0	0	44
X1f43a4a7b5bc7f20f2819829960d2a05	39	0	0
X60eddfed3db077e743e20425c0809bca	177	0	0
X3e13930a4c0faa44544b5b99f80f0f24	4	474	0
d3d4c3e8a14e211200f045f810c282f2	0	0	32
X53e724b397ed7e641aac893612dd8a3d	287	0	0
X127e51a2b585677d386b70a91a16f29f	169	175	0
X88eaca283476a5c15eb125cb47fac39f	76	0	0
X66f11b4255fff2ed033fd949f943e90f	304	117	1004
a5cccf56d02562f289de80dcb0e1b897	12	0	0
X606c11b81d5e94f0deb943123d08e91f	4	0	58
X85bd78e741f32afd5c28b26dc495473c	39	0	0
X84ea48fd9b8af737764fa744281ee6d0	0	0	132
X2fd1f9a1fb9443ffcdd28e1c346cdd43	0	146	0
X8d149999934e9b39daa70ee2f154aec8	0	0	106
X9389e96a515d50a7036924ef026e93b4	0	0	88
X8d78129035a164b36e625048cce69759	0	0	37
X451449fa289d3d232b89cfab3d09e6cf	18	0	0
c9a8826f4b4dec93ac3781749c1ad80b	0	73	0
X3236ed99d0e87a3dea85ebdadcc2e712	40	0	0
fe641315e26ecb4a2e4a8c9329a1fc42	57	0	0
babf4a8ea0778bb8d557e682f90b0e4d	46	0	0
X2412a14a9b668bf754f0b3659be0c421	120	0	0
fd91d81506b59a6ba08b55912f46c544	0	0	24
X22977dc0c8f433e660320a0b4bd8c99f	35	0	0
b069f94c6f7dfbe07c4d19f27ec5aa09	94	0	0
X28dfb229eaa1854d23f7c6996252a2f5	130	0	0
X6e55d1f0924e9770034da1553e744c8b	0	0	20
b0229ccae90cda6aac0fe7ecdd72e97e	0	53	0
X63b54ccccfeb8df3d6351148bd586f14	13	0	0
cdff658a3bbe0e7cfaa11e0e6fbb7a25	28	0	0
X7ed2ba522979dbc6b6bc3182b8d89665	13	0	0
X0bda9384070c64843ac573a80025ba42	0	0	13
X8c3f6c6b6dfd95c469b891c94369de7f	0	0	73
X9b6ea621ac4a0bdb17cc60552b028e92	10	0	0
X8debce366daf76a7e53a78698ab9f84b	0	0	157
d8519a1e6738c973a3ec38ddd95c5f02	0	0	33
X18ec5b476826ee954a235cb8194e9c7b	35	0	0
X0bcfb8553d5ec0d5f5b25c4c44c7de38	20	0	0
e7266ff970e6b45c2a03067bb5588640	35	0	0
ecf4ab4f11d7af9c1981fa355e13a045	57	0	0
ee6bf4f06dd90c9d19b6586b4720c7be	39	0	0
eebd0df4eca6c499e51d6ca935df6c0a	0	0	13
X1ba5f5804e4e1c186d72d1e5a45424a4	0	0	15
ddf0c75a03e69fe15a86b14b54a76bf1	85	0	0
a65ed78cca7f61efe7da4d336dfc29ce	35	0	0
f95e1ed1b2798c96bcba26ee9196d86c	19	0	100
X703475c6cbdf0b0d7e4c640074404ddc	33	0	0
ea621fa6bdd12916d340c5182dfe9edf	0	0	28
X690e050a71c0484b216691061904c57e	2	0	104
X8288f70c2bf4e8bb151a5fb20a6e5db5	25	0	0
X4de74bb77b684c81060a264730cda51f	0	0	80
X9c16caa2e06d263407c356ed0b3341a6	24	0	0
X55ed278bebdea3daf53b551bf24bf005	0	0	26
X39a0fee05e69587aa22f154e44a2f04f	0	0	25
c9cac91eaecd485e1b8f99915e741e68	101	14	27
X480dd49692005de38b44622103d15911	0	57	0
bec4d2d34b0d8d6171b84aecfc6aeb7c	0	0	93
X0746f62bb7b8649dc80f83ec5d8d45f8	81	0	0
X76f709806c75aa4eee8441b744cdbbd7	39	0	0
X0ef039b0a8258d53208e717ffc5c1162	0	0	31
d3b1d1d867c26653943c2bd2985cf70f	0	0	19
X2f9065c71d4447d205da9a52504032c8	16	4	0
f2e2e7c1fc83c502fb96cf8fc3c9083d	0	0	29
cbbe9e036ff947d99bb62fbf5440610c	14	0	0
X0836cd9299020ec51714011d9a87cbe1	0	99	0
X7b4383488636e4da02818a9794970453	52	0	0
X8bdb481afdebcbd112d7fc253c1069ad	0	0	97
X8959cedc646683f0480941082ae6023c	0	0	63
X75b63c13a160c12e85be8c3870fb55f7	34	0	0
X76d9aff9a4d45e1fe0545043d63e2a20	0	0	55
aaad8fdd35fac44e8e10881674af9567	23	0	0
X1e395390117e3cbfa1b05e6faf49a215	0	0	21
X38519425b3e520bfe52881ef310c9c60	0	0	55
X15785b1aca4cc0302d82d515c002025a	21	0	0
X5d2f9be8c8d68dcbe387d767e64ef1aa	14	0	0
X5e4f78c7f227766d6cc51956e74a2c2d	69	0	0
d28dbcf641c64e78e96faafaa17fa6e0	0	112	0
X9534f4c4abaf0e800ef8eafd0919d855	32	0	0
X498ffd69dc0e1e8086a6ba063a937393	0	0	27
f93bea1e0111fea3c88a998026579c3a	0	0	121
b42ecf9b030c5551d9c1c9d15320886a	0	92	0
X71c5164edce71af9f893a03d4cbbeccf	17	0	0
X60903b460a7368ceeb2ef6d0b83dcb1b	21	0	0
X131f4c8f57b9f6c7c7f7a7278bfd9683	0	0	63
X663ee461020a9026cdfb908b5d5726e5	15	0	0
X49927a0b31e5f68b32a09924086cae84	142	17	37
X2bf37b4e403682a337065629f5508aad	0	0	34
X54fc92c04e36cb8b3045bf93488f4784	0	0	104
e4a0e74732c97ef0e540dc8074106b68	55	0	0
a29690612e9055fd5bbda26ab8fa1a9d	101	0	0
X7ffa4a341ad2159a8d301e6d6b1edcea	0	59	0
a198d51d5bfbb2adeaf4ecfc5963b3ab	0	0	26
X2376c6a548ccf1a94777daebe4d0cc43	0	0	49
f13220a4bc71dc460c65812e8e652fdd	0	0	29
f0c9cfe2adfb3559b6789648877ce786	16	0	0
X63763b7d43797982eb1c317002820549	0	0	27
b58286708840c2f3cb7b30145bd871d0	119	0	0
be4149e59c86231aab1713d4ff997baf	18	0	0
X4c0c58cf3325beb9e31597098ec917f6	0	0	97
X1968f005fb9b6daf76c7aea5e8623f8c	12	0	0
ad3ea1c7c1f8b733003e1b69baffb2c7	66	161	0
a9262bfa828cb60b46512c04d7e8c926	20	0	0
e4f730fe7e5c9142223ed7f3275c3c23	0	0	17
f79490797acaea503b289914469392b2	47	0	0
d308aa562078b8d40f38b7f65caea059	0	0	195
X521530890179be2a10c44b4b7529848d	59	0	0
a594a2ab379ef0830b9d0668c32b549f	5	0	320
X095ca6681a3d7b2001b900f4d99ba3de	0	0	28
X8116207679f6f6dd2952bef4f59243f4	241	0	2
e0ecdebd6356c2a8bce94b1242d5748f	0	0	116
a0a32d141efd5fc3dc258bd1a7a0c02c	44	0	0
X127da34f340e1bf27dd4f186303ec010	58	0	0
X86f7c117c1185610fd14fcbd15ffb11c	0	27	0
c0d1903a391f6a96bb4198d21a2737cd	52	0	0
a700987143b131caeb13882e959ffe60	28	0	92
e68120360f84cae0d6b066ebed6dcbfa	2	0	44
X21ab33063823ac001f4a5a907d1c53ac	3	152	0
X683688a8ba92b6486222addfdadf3e3c	65	0	0
e151d43a07cc9685009eb70f298587a6	0	0	2
c790feda476dc9568d77edf536f07cdf	938	245	107
X37a66e15bbe7cbc26690726a62294cea	810	0	154
afa818764239c8d90d4726cebff4a274	0	0	103
c0d13a294988481ff23371d29b149753	146	0	2
beaa649871ad7d0aa628fb112681d101	120	0	0
X594588defc66dd8418f9b6cd0d0cf7c8	14	0	0
fe1a4ae3453693293c8becb857f5d82f	0	0	544
X461e2366eed520911b2fc4e04b5b793c	98	0	0
fe2cc8cc4bf815702f0154c5a5b664ed	100	0	0
fbf8294a17d4427816d72e9219a90d4b	0	161	0
X7ed07dfc938937fb886df1997995d664	302	0	285
X19b385c3737a0c27581355d6f35992ac	24	0	0
X24462d5f99c8f538211b38c6f781aab5	0	0	16
X362e4ec3294a72e65bf6417e0a8aecf3	0	0	158
X72cd28cd363b3471f1b6e1bc20715fdf	320	0	0
c48ff9c142fd001b4dea704bec0ea73d	389	0	661
X64a88a755360c81f47a61a828ad463ba	0	55	0
X743d89e8d442fbbed5b49beff5722fab	0	0	428
e1c2c94eeea8709f72632a63c2440f15	100	0	0
d7e43895e35be5f61472c26689e25391	0	0	305
c15ca4149a9fa25abb8a60591fa52276	236	4	0
b76e8acc0763ba037a58be48b4971842	129	0	2
X54adfe38d12409f4be824687b095d98c	0	0	48
e9b1a544eb9eafd5883b66aebe1b8ad6	472	122	11
c750736c0d58edbb2e2c6ebc437d4fb4	29	0	0
X745d7c9c4baae4a9bcd25837201e814f	12	0	0
X95686dd784a8508a4a8adf4d646b124d	74	0	0
cdee5fc4891587c674f412155a40330e	94	0	408
cbbc0b2fe12aad3478d9726e9eaaa8e4	121	0	0
X37389bc6f9c30e57acd084720328bf75	0	0	116
ef88d6d8b4283d8f629ea38e4d5f4578	0	93	0
a61592d6c8e7d011b2602b67f3ea5517	0	0	123
X63e83546119ce373bd87b10823410115	2	0	296
X7a8fd9d79a0c47244a7a658bd149ccb8	61	0	0
X6ab5991abdca0c91025da7faefc9f590	689	0	660
X769262894c08c8ac43d3662fb60147c2	97	0	0
X3e6aaaf7a073ef70a7e6d11544589aae	0	0	76
X89e762d39673f1b29316c16a13f44bcf	166	0	0
X971a22b5d049ee0a1cfa4f01c7e7dbd1	64	0	0
X9ddaa15525ec16736485d86cec292d06	139	0	0
e1eeaf06923e944008fadc73e358cca2	198	0	0
X3c7088a975c0d411d878d5d372f72467	45	0	0
f7367f76cf4243d8c5b3af7298a8f721	29	92	0
X12501e3ab809c41d728ce9d6454d7533	22	0	0
X42b2c0a66dc246297deecb9fb03a0915	70	0	0
X00eaae3cb262ef7803ae98e78542b74b	21	0	36
X8e064f475125aba36d5b32410f942dff	450	0	2
bba20cc13b4acd44b1e6d2f325000034	234	0	2
X5ddb492bff4f84776bbff5a8be459bd6	0	113	2
X7fc7e341e2b732293b4226018e0dd88d	0	0	17
ccc2e8f63b141e31836c8ec67d6f712e	0	0	270
b64786f3d068ad9a4deafc632e38b16a	197	0	0
X47b282f4f63413c443768c89066ca2f5	111	0	155
X6157aecc2d96a6e952b8774f49b0c3bb	136	0	0
a96da97c53cadf0c69470cd1745d3c0f	129	0	0
X2edf8bf8736f2bc8249d453a55ba3685	86	0	2
X7130d3b6619b6c809f3caed0d9ed19f5	0	0	104
ebcc8d60d8f34498bef098e54e833dcb	0	0	39
b0a343475fc9db6f6bf7133eb9b81fef	0	0	22
f9ff23eaee78872248db37288c7d3201	166	0	0
dc9edd4c36e15289a2eb4ebc5e5a1ab8	5	205	0
X1ea92316f2ef3076c524fe8a01e86d57	2	0	175
e5ff3bc5ed591390d074d183c86d237b	283	0	190
X01be1d179f97a2c32625224f0a440baa	0	188	2
X58bce83a7de8e33bcdc36cf5f9e5f33d	0	0	12
eed06cae0ce8d0e387896ded35b7c3f5	0	0	31
X10dd4009560cde7426866d270481da7c	0	0	76
X94c37b1bcd93c038c36355b76fc9a080	27	0	240
X626743a622bd255a5007dad673de7985	0	0	22
X29a597a24b34c0c10868276f8c5efd91	71	0	2
X174880a798985a8e36788d137c35d9aa	150	0	0
da1e7a4763eee21eb9ce1a9b127bd63c	38	0	0
a810e56a97547dd0efbff7c874431b05	0	218	0
X7baf8430621efb53e811f0c5fc7b5bf8	0	0	83
X31bc0bb7091d6b47eca4a3a8b39f94c1	120	0	0
X1012664eda66e97d84bef8f539150a01	212	0	803
X277ad82f3827d3e9f93617b2f9432728	107	0	0
X65435e1f68d2c2e92fa264bdefda8181	146	0	0
X3540939d239703d0625636e11686746a	2	260	0
c6219cea6cfdfad201e0ff4643bbe1e7	162	0	304
X830100875bc34ddf9a3f0fa6a87fb82c	83	0	0
e10c8b52d42f96d3062bdc9d19bed0a2	2	0	193
X6ea54ffe45bdb7b9f93f939fd426a0ba	283	0	335
X0afdcddaf0c643e2a65060982bdbbc13	58	0	0
X256c54c8c62fcdfbb17c83aa3d1b93e8	192	0	2
e2fe12bb5f6d3eb988db1af6eadd0fe8	42	0	122
d94ca07baed7ee4892dac0632a2430b2	0	0	53
X62b5963bcb37ce4a46cc4dda18e27003	482	0	740
bf233de814072cca1b41c0ae29b15db8	0	0	124
X1bcc872216c18a8426889d432fdba5f3	0	0	178
X5ed7ae2bde7ccf37eb01b761a640124d	28	0	0
X8958a34ad6b025380d64ee19f6d085b3	43	0	0
X659f0a406e19850c26fa1a519347aa58	81	0	0
e86f535ac623a5497852f9cf1c323ee7	73	0	0
X8e6588e8f99cf2f2ac6b70c50dc8a153	0	0	60
X2fd7cb6d5673adf8635ad20d473b158b	1285	0	547
f2d2f8e7cc179726dd56b131166427c7	16	0	2
X4d6a3f9f61a3bb829185069caac7d070	0	494	0
cda6f1fbcb140ac18ba1509b104e6b04	55	0	0
X04732231dfc81cec0e4032b560166a43	266	0	324
X395ca792bb9b78a9719f7f1daca77bc0	0	0	88
X9b52f25b25d99911ef9363e82da9763f	93	0	235
d993b1e1ea4ac61f27114cb0e68f7bfc	0	0	38
ac6cd15b1211d1387899d458f3239b5c	0	0	29
X701b411537392abf2994357ceb39b4f4	85	0	391
X2462d2df0991a80d0acfe3fe362ad58b	162	0	531
X6081a40fe89de5046da85289e80746ea	0	0	67
e3fc6bbb5455d313318e263f2acb3798	11	0	0
X272eae668d377e794232d062acc088c5	2	0	770
X7200316934562256fc3b6e174fd33140	0	0	99
dd27d51d1c62979c0cb3b3cd3f5dfcda	0	19	0
X3a780605be61da43ac20569a849eb274	129	0	165
X381e64b8ad36d41234f787788cc7c53e	21	0	0
X01539723a8c0e051e6bbe5ee63988695	29	0	0
X14803b61ae043d59b68a4e017a0ddca9	72	0	0
d865613396ac4aba9379957e272e2d82	2	0	189
a13944b4fb245abef1fcb67eccab4f5e	25	0	0
X7dc55751e23b15dac1e1c2cd5c7400de	92	0	0
b036b078524b3b77bc3c4c30b3d9ef02	13	0	0
cc7cf9090cdbfdb110aed68ebe7fdaab	443	0	415
fd68edf293abfa7ae0add008153cba68	0	0	94
ec22914ee96c222d931908977432d80f	0	0	120
X01eb8e159bec2275ec862ab8190cb90d	160	0	0
dd1b8ae326b7edd15e5accd1e28108ff	38	0	0
X95d7542ecd20c39c971afc1e192f608f	953	208	244
X35ff951444b5d91dfe79b0f26e68aa69	13	0	0
X25dd0bd2670dc79962aecfabf1636dd7	107	0	0
X3e3b1971139a3a5262b9442c95e2045c	106	0	0
X070ae0cd9561a81f2da2abfd62c5cf3f	0	0	272
X68ba6d9a99a712f81dcce0d2c8febd24	30	0	157
X202f2ceecc6ed4a585470f5ab3610433	60	0	0
X029eeaa8d12526a3479ab5ae46a4e674	0	0	188
X323bc687b154b2cbc9307a368a887006	170	0	219
X07014399e01d8aba8b2c22c8bb87824e	0	0	360
X1e7262a4cf7544458dbb48bdd596d16c	40	0	0
X59ab7c5dddba2d297b29d6ec8a1abbd7	0	0	71
X79111f1f67fb2a3c5e72b5d737bf31da	0	0	142
X05d3f6b3fa36ca0196a5d08dcd9b38aa	513	148	309
d645e6dcab0bb0354284cdc611760b88	11	0	0
X08d7c304db86aff5771b57e56f28b222	26	0	0
X7098e1ae2c115a22474c3dcd4b8dcf7e	0	0	23
e166045631aa196e83bcf94144cc8aa7	0	161	0
d98d6d01dd37eaaadfee9fe4c75b81e3	220	0	0
cebe7543f0015e4f67011450da19aaba	151	0	0
X36aaa3f5ff717fe2318c60d814f72f87	144	0	0
X2c137720dad83a897c38da4baeb45939	12	0	0
X9a74aef730e477fa01db6d0349ee67e3	169	0	0
d37def1bc489f13a085ceb12a68ee927	134	0	0
X9745b49610981cbd8e3c76c5b8d5163d	893	0	333
X9dff8dde08afc35d8f214a8dfb1c161f	0	0	185
X43e9438283c5b8e92e1f2e3c63b5951c	181	2	0
X596157e347ee64e0bf0d9bd84ee1726f	113	0	0
de3aa18038ecfe2f6dc471ad5d96ed8b	0	0	111
X8d2f261b824b7357ce0a6ba13ed32fd4	32	0	0
X9c1e8f3723d8b43d4c43d8f4dad7e1a3	17	0	0
X54ccbccec9f1297cfd3a97a96fe81c8e	42	0	0
X1ff9cafcab4e38dd15c96898f0b6c94d	116	0	0
c0816b40895a64de720f6bf4b2a799a9	362	0	452
fb5a3fa4b1ba23be2be41887642c8532	0	0	228
X86684ce23aa925fe3af8a25856a6fa33	0	0	128
X8b66200ee61964bfdb659943157d3fbd	0	257	119
X8dd38381aa1a3c9a7a9417ceeba4f15f	2	0	63
X034e64f4a297b29c95155e324269b7ea	14	0	0
X9f5c382b90ceacc04adee58111151588	0	0	154
ecfd7885ec8b0259abfae5e9bb6e8530	169	0	0
a4e9b738c7a4aa5ade3e8cb975557d7b	0	0	107
X66578b4b113d1fbed435d48389a0204a	192	0	185
X6fb3328513ffbef5a1917aeda9ace6ab	6	0	385
cee8a73fed459f125768d100149036b1	168	0	0
c080f8dca7948d7a315ada9d19a02b67	255	0	0
X49075c66dbd9aa466ada080145a08e84	0	0	136
ed06e6e4b3b59364fcdf419bdebc4776	60	0	0
X3bbb61bcef6cbbe66fbfcdc10154d5e9	136	0	0
X867c33108ec7ad443929327bed72e39b	7	0	495
cd637377551f1a3c4fc60bc7ca4a0acb	0	0	51
X9e73a284fe313a1f03d5f2b6dcc48cb3	0	23	0
ea9febe3a99cce12ea0ac719cffc09e2	0	97	0
dc1d33f1f32a48cdac081ab9269463b5	1211	530	1618
X03d4fc3b1bd1d9b908ce96a90880e277	0	0	49
X74853baec49666da5b2dfca98c42a967	16	0	0
X04b882ece0a18777c2e674b9deaa7ae5	105	0	123
X42599e6a96626f589bb3bf99ef4a53a8	0	0	197
bcb817ebbc8f4f7292899b60e5fc2b06	5	0	570
a49058a159eefacb885a35150f92424d	109	0	294
d4ce2ef4f3505f69a3493f7b7b440208	100	0	266
X31d1e0517b598e2ef38c7745e5ef0705	68	0	0
X7673265c2124e294c872c502493a3463	450	64	607
X2db4bf47d44b38f9d86a014db6ecf41e	0	0	10
X25fbe551bc3546621f0cc8c1b2bd292e	106	0	0
X68de9972ca769618fce01d18f1b41a28	0	0	137
X6723112b640207b8ba5e41f44d140199	0	0	91
X64baca04dbd8dd752a7e333da204de53	0	77	0
X4539b2042279aeeda9b0d85e292a69c7	59	0	0
X3c51465dc5026a670055190294466460	0	0	37
X111d9022647ac7bd43a503eed27242d4	0	0	13
bb8fdedfc84d8e7399fe526e35113474	140	0	0
X9f9720e31cd51ec597862f0aaa03fc51	290	0	9
e926816b6f39c38c1ef509affbbe90c2	553	0	375
X9b1225d6a68a07d4844f91d104d97a97	308	2	270
X38b7b3d54b3fa07173a3fd1a73130d97	38	0	0
dd66d176925f315059f21d2caecf43ab	60	0	58
f9e29988e692b46ce8b688a739bc3c02	172	0	0
f86a56c04c92c2654a5b48368e3f4898	73	0	0
X626ab60d73eb2b461e7f4ff99a2ee254	168	0	0
b1251c57689d6a14cac81aee3fcc38f4	0	0	212
X6e1e4d3709b9fe4837ff94807097934a	20	0	0
bfbe0b2af45371b8f718e12047901d34	171	0	0
aee781e82419706b64edc3ec2ab5fb8d	2953	977	1579
f06eec0368bd063006268ff8e399849c	37	0	2
X15b3aea7fb4171341d0c553d19726001	2	116	0
X1e9e95691a36aa513a3eec4b71280318	91	0	0
X6be944828e3d35e6896995a24eb67230	0	0	142
ed4d0b5cdc59878ea45faf32081954ca	0	0	205
X1c85f0d93c031917aa56540a8f872e1e	128	0	0
ec2177e8a8a55bf344712cba20d4bc2d	37	0	0
c970a25fbed5ee310bbd07972c0458c3	38	0	0
d2608c0716582e7ca861ada788413ed1	0	0	341
c9e21487d2c08ef8edf25f17f2ad4f80	0	0	22
X6a4ea7451b5da9d08433bd60a6126a63	1599	0	1834
a53e0ec63306c25ee6766d7adea85139	219	0	0
X850047a0e88970352aa8894923a6716b	0	0	140
c77c34f2c9be4d093d831f453126433c	0	0	38
b6e447789812ca339d0fa7d9281e6fe6	0	0	404
X1e66b798bb65b016905fd25f54f3fa91	132	0	0
c44e7ab2c65b060a1389cde730ae7ecc	4	0	357
d001b889b342aaed008ca8807f7108ae	154	0	0
d827af377a74ba2b6d8c4cbfd6c44bd1	0	0	53
X5946056a6f685d5498f39f3eb2337d6b	0	131	0
X25e187b1ea1226aac3fe004666dbd7e2	179	0	0
X79209be69b8617edf9c8775616cef62d	0	0	13
dd1c258010029aa59bbda99579186f15	147	0	192
e704b6938c72f6b92cac2944cad79d4a	0	0	525
X906f5c55857a14df829d58f44cc73ba2	0	0	264
X6ac84ee14ff8463649783fab4278844d	48	0	0
X2b8d4cfcdd1c63f69f77cebdcb0fb39c	37	0	0
X49953c59cc28b73f087c511bdff7afff	266	363	808
bb0c593fda8c52262e600e2d0b2aae7b	9	0	561
c3d74a63d98cd9fc93053213a53bfd1f	132	0	0
X3a50843ea569d27caa8523019fed05d9	0	0	115
X7a0c685a64460f7a2c19382c999d91c8	0	0	177
eceecbff762963077256e397a055637f	20	0	0
d67af91c793d744a2692774954d4c7bb	0	0	74
X2453cfe9c7a6bb6e48134c0e9f130646	568	257	1516
X07688960389430dc613984266961ff22	0	0	208
ba679428d152cbd4e472f750cc79b879	418	197	0
X62871d819383e6c2644e76309962b99e	102	0	283
c9c24d492e21b3c75256c53dca7f2b3c	170	0	0
X16c7a80a8af6b3cd55f40966f8def6de	0	0	20
d32676ef74ac1df3bd7fe12369361c58	0	0	88
X06a0118314d34aa3ee025fd8c647145f	100	0	382
X2efe6361620421e38d500cb7d4de11c5	146	0	0
X2ce3d3bf9347c49b05eb3e5ed7bf7c21	69	0	0
ff82a9356e45daed641eb333f6ef11eb	0	0	122
X088612ec97e7035da14d7d23cc55a4b8	0	0	127
ceeceb73b4698d00e9af55e7a89c8c32	0	2	116
X6603cd431971468316ac81dba45c110c	359	0	0
X6a2064d78ffaea0fc2642c27c7a6d11e	0	241	0
X843039ad6259dd71742a7a54a3a64b60	262	0	104
X8a1962790cf493a499d531ed0e002265	202	0	0
c9dfa27c22033abdf8530561761b4be9	0	0	165
abee468db8919b71218a5ff72f856fbc	240	0	0
X1ee6374c78518623b7da7f32d42cbba5	134	5	0
da9dc63e7792b41ef4c8e90a48233044	209	0	234
X1457a11b897d182ba1d53353552d3766	0	0	91
X153cff5e717befef5460ae21dcb24d5d	850	0	161
cb5ba5b8168442872e88ec4589c7a2e2	143	0	0
a21ae19f3b84dbf756d5f5d8bf2a64f7	73	0	384
X353134fad31936cab93e1cc9ce42fdf1	4	0	289
X64095fe7a12a5c852f340941622a59c3	198	0	2
b625b4eed77c195fdcf30e8e8a92e4ac	647	0	214
X6eb1ab19be25d545b90a3e47264b0ad9	110	0	0
X6f6db37ef4d7bc3a7e1171f158f8a83f	0	0	84
X6db64bd79f3eba35f4a2b79c039b0885	125	0	0
X06f17718813c45a4bac2ac11c9878ec2	0	0	202
b49d68ec60524c4bcc8209d41003b3f5	0	0	143
X6d381a879a52a605205cd29363f3edd2	147	0	0
b62b65dde07a4d1a1ac3ba00bd368c31	104	0	0
X34b847749a093608a7af1445be4f7ab0	54	0	0
X308d283ba84d4fd7fe77e2a91877c3b7	0	0	56
X59166484685922891ef61ef780e9ab5b	139	219	0
X6f453aa32a9a1a8a876d6d272f4bbb7b	30	0	0
d8ea0dfb5bc478dc6fbd89170c9b1d2a	0	0	123
X93e660b4d393c0baf43d1b5bb42da507	0	0	113
X1829461ca83791c9ffe1adbf469c0976	3	0	162
X9b17692e77afd1a039138b5a2a45a985	176	0	0
X7bfbbffbd8825156ed541dca7a91ca5d	24	0	0
X36886c04b5e781a254c9bf72009a73b7	0	0	130
X416c430edb49a1c49dfc07c36c3b595d	120	0	0
a0590fec25bec7f80f81b8a1cfc9e626	0	0	68
X3700b8fd7c4d459c2807e99e22bac936	0	0	267
X40433b215df84892f8524a98fc6d99bb	0	0	474
d48521f0385b3ff8bda1b60d69f0a5bf	69	0	0
cd386296760e2da3a0129075cc28254c	271	0	145
X6bbc6b89d23e7cd20b3d4c53c7937b1f	13	0	0
af03e882562686da45120a6f88d43492	69	0	0
X3f869ffd0af226881243e0131d919310	89	0	0
d3589d3972b2700d07a079085d2ab2ed	0	0	136
X465fd6b97e9b8172a6a9dc35f7966fbc	0	0	150
X350341098460a27bf79b26b6f86a3354	113	0	492
c7d279a37e647748c849be02bb13d8f2	7	0	213
c65f3f36f03e1d8013b498e8cf57a278	147	0	2
d5a780884c2ac0eee94d2e293bde6c58	22	0	0
X8da2a01d9acf53df5f2040e7c271ed3c	345	224	0
X4b34c90f3c6242d61a83ad8593d16bb4	71	0	0
X5aa9d7b4aac53d860acad9161d432167	108	0	0
f32f8769bc0a54353abf21704c9b6663	51	0	0
X71178cefee861e216371e46a766dffe5	265	0	0
X94b59edd3095558a9acca385ceea9407	166	0	3
aaa4ee19e9d35febc222968accd509a8	18	0	0
a1055d54390f955a076739f4e6623291	177	0	0
eee7a7d470a2beea1f4beef2ab9de65f	0	197	0
X780901a819646fd6d1a326a7f991d995	0	0	60
bc6992ecb4d6adcfd641432f805c0632	0	0	127
efa8f5171416d70a60febb9d96ad5b5b	0	209	0
X42818c87423187e64080eae2fbdf5841	852	637	500
X38f3650352a209deed0705682ad9dc01	28	0	0
a8e69a3b4f49ec964908951d5cf933c9	190	2	0
fa9f6bccedc4da6d5e0b8cf52977f6a4	42	0	0
X3a99cf9cc6dab62af1862c3ab67d5770	85	0	0
X7263d19bbd472e9163d2c8f140317acd	589	0	0
X47f3e2ad64668387d4ac44feec926991	31	0	0
f5a63b659cd1101d1a4239ba192485a0	0	266	116
X473cf7db885ee2b85345e521a6ecb09c	0	74	0
d23a2cce2ccda879de3dacd0b65dd01f	25	0	0
X47a63b2d053ae9e10cbf107e3b4439dd	66	0	0
a5e17d2389392effe243c99d17a5a9c2	375	993	140
X802737fbaf598000dd0427251d5a78b9	0	0	166
X67f31103922df2b4063f87cacbc26cad	163	0	0
X2fb4d858f1df67a29e23a058e0a780f5	0	0	64
X220acdb3e021feb61a6af145e580adbf	0	0	51
f4c70cec5e501ea6aa408e99d1d055e4	0	0	174
X7285a04e210ac76846d3be3fa9322bc0	133	0	0
ea003dab99c0cee2836420bbf223a39d	248	0	178
ce7867934be38453fa7744127e49c9bc	305	0	0
X60c22592630edc38e0db4dbd35a435fe	28	0	0
e40e2e7596d718354231ce223c630926	0	0	433
X1d9153a2ba3c551581d4ef19889529ec	22	0	0
X86ef16a60d08c6ffae62c9525cfa54bd	12	0	0
X6c7d0d0c450e711e2f551c7d19265abc	180	0	0
X01774c791b4fe6190e8e0f04d8464f76	103	0	0
X871f6078b5d5a47357fd2d6dc65e84c7	0	50	0
d616b0b9eff0cbe390ea065566b7377a	48	0	0
X01a5f2978866ee07c5275f8918bc0e39	70	0	0
X4ff35c39ccda8ee72a838fe27825f641	206	0	0
X326fc403359f7e3a513344a751e29fd7	0	0	209
X275df9ccbc5ba88d1f0195c2bd4545ef	0	54	0
fa34ba4ac67927c92017e5be5dbae4b7	0	0	235
X77b19a8c1c0d1cd20cd1d228e35c9266	0	0	171
abc22580d117849a6b4afe6c736e25c9	0	0	62
d6ca046d3d9a35cb32d78161d2153716	109	2	0
X7dc8692444f21645dcefc9b25dcb38b9	208	0	0
c04ee380f524a3ffb61e1e48efa488fa	171	0	0
X38ba75a9d6e0531474ad935ee5f7572a	0	0	282
X1a5d2038c2f9437b85f7977fe3f7b20d	57	0	0
X40f046a795b1b0d60eb2159fcd96cf24	292	0	8
X3b49bf3643fd99fe03ebf6f22db6e892	0	0	109
X2d60fd2ea2ce7516d9f1905816ed7020	0	0	172
X42be46d4985f50af06741b0f6f65fee8	2	217	148
X537756466df411cc0d8695d5cf00108e	26	0	0
X60ee6def97b5d435023ceb36c546b8e1	10	0	0
d9c73b808a52328763806f4cfc7dfed0	258	0	297
X82a4ec8bf59ee009dcb8f24bd09d19c0	166	0	0
X264e0a90616c364989204aae191e15dd	107	0	0
X37aa8b2a79a0a38b9a79192d0f23e821	0	0	75
X9a179fd49271e5823dd7396ba879d8aa	0	0	42
X78bf335fbb87640ebe510be7bedaae67	0	0	261
f1e441af8e16acdd33fa848da6331060	0	0	33
de2de4d35d23004c5da0fae97789d69f	2	0	145
X1aa80e522af81a0e134245c8962a6423	165	0	277
X00d952ec6047b29ffcbba6c5e9ce6bfa	81	0	0
X4245ffbce968b7094edb4bd6b54c5b5e	21	0	0
X43eef7592b5fbcbec353f5ccd61a5cba	3	0	34
X83f7f10530c5eb29701a7ada67d79ea1	11	0	0
c1f47bf216fb1c3faff6431a4d3584bc	108	0	0
ba3605b088f2f01939d31d6b52c09345	216	0	0
X93e21aebe94b40d81b2c40eda24ab2a5	0	124	0
X4b5f83598f8bf3d3de503acdf51deaa1	160	52	281
b373c1d34e096e53340503f626ec9715	250	0	0
X45f54a4ee8f274b89303161387853ab1	0	103	0
X887496e0fe777387abefe7700edf7fbd	0	0	151
X3a8b1db28164fed5f6c2e92ba205337d	0	0	634
X29e305f65149378bb81b5e1214da8f08	295	0	0
ed81df7f717ee1bb81151a82d90596d4	3	0	273
ccdf5094b0d59795ace491e8601120b2	107	0	0
f33f6a9099cd39f6582db18ab4545c74	44	0	0
X490a498263c49c333cf97a91bfca7c92	61	0	0
b14e042791610ae654530c2b43149002	104	0	0
X6c269145adeeea969cf6e35db2526e81	508	0	0
da4329b6844e2f0b3324830197abed67	169	0	0
X9e9bda71303587ef0b86df61738dd0be	0	0	248
ef14b90482517e7bdb5b2b5af77a161c	22	0	0
X8e44982368cd9408467ee4fbc4cd13a6	205	0	0
X25d7b8c2c858a42eaa6471a584ded2ea	124	0	0
X9482b3cb2eb23d6fb216c5145b5d1d94	102	0	0
e8bdd801fa3dc09f6b89087ef55869c4	45	0	0
X4331a4c6a8013003420ca6ca7dc05063	267	0	2
X217d789004c6f493a540e01c5c110775	0	0	123
X18ea2c7bfa6ba1648e5c0533928b1c9a	0	0	146
X7988360cdef72660d347c89cd865b32d	2	0	165
X71ca80e94c64e52b775850f4fa03e952	0	0	66
X49fb894609869b59dbcbe174947a3288	0	0	29
X7613dc375da3c22a7aa92f4d630e3be0	0	241	0
X908e0ae11287de9038edb297f2a22dbf	182	0	0
dad100cd1f2f67dba94d2ec7505d22c1	38	0	2
X5f57eed8911009acb58dffe09f409a40	130	0	418
e78ce9d34021b9e15625e991e2976975	0	0	267
X624c164e04ddae3f184765e47739ee96	206	0	0
X927f290e589a7a1405593f9d67096f8e	149	0	2
X22c97cae2aa330d8090002343e254f1c	172	234	3
X63b38c085bce2f62aeac2599699bfb8b	28	0	0
X1221d5947389185494b502bdc487480d	12	0	0
X2cbed4f3b64ef9306a7956f592bb317f	0	0	50
f480fe22e06ef58e5686102b9de309bf	11	0	0
e6882bd3f57a0bec27f2d7548533dce0	0	0	108
X298f2ee49b7155a0703b6ee7c3c84274	0	0	55
X8d67d1c76ec99fd297e3ff50f0479156	202	0	170
X7758476ad120a96fec5ce77ed4eb83e7	0	0	104
X05e67cdb4f037a5a05c2214605fca616	0	0	232
e3aa9abdb295232615affd720b64ed50	0	0	210
d15bef605cf874061a7d5a9986e2e9fd	202	0	0
X6fa3c5c67db0a79b52e41558958efa5d	0	0	86
X52e0b5d92e5fcc099770d0144652575f	2	0	187
X1f2d941a16560ee9a7b7b0fabf9e6931	70	0	0
X7286c1929b9662e3cb5a808952d50e09	166	0	0
fff324d5027ad33ec3043dbce7e6c428	0	0	169
bd14a183919105022f723e7395820450	0	0	73
X7a18a1d64cc54f0f86b1611b2a01f140	20	0	0
db8743bbdfc2a8482a073bae8a95caea	70	0	0
X1ad4e554fc5bc125d218b0c312b4044d	108	0	0
b97770458455cae9ff9cfa4d61f25274	0	0	72
X7729f23763163cd42499b1420bfc93bf	102	0	0
e8caa3f5f55c2701c348ff86352034e1	116	0	0
cbeca15943be82c2d22d136df57c050a	15	0	0
X0dc621a0d81e0d3a228c64c4ba05ab35	51	0	0
X45837c8d7a1b5a1a4b94f25c3dafdc04	125	0	0
X495e0afc53d4b1ab764d2a263bfd4d7f	0	0	140
b94eab9425471fc44a4d9bd915d596a9	161	0	0
a02a1384300d5cafbf54b53670609e06	284	0	0
fc071aaf00625c55dc32cf708574a56a	1945	0	266
d8a5084745a5ca9e824ede318afc43ba	45	0	0
X7e65b489665e252962c351e86974341f	202	0	2
X2a0ee19e2542786c954e75541221186e	384	0	3
fc659bfedb6e32359149c91f9d0c4a4f	0	0	173
be67b619afd910fd7446ec13b069b5a7	0	0	24
dd266040b7fe1fd21bcf5923abfdfe0b	0	0	188
aa192411e54f77910ebda7fcd0a0bb3e	200	0	0
X37d3accfdbea3987e363099fe83f4e75	0	0	267
X3a6cf58f9c02ebdcb75bc9cf1fd63acb	131	0	0
X3220d67bb3f1627ce611701f9f2aa420	2	0	130
X6375c122d3a1afbaad2426e1973f3ca3	0	0	66
X99925d95a558b243b86671250e47b675	0	0	286
X9bc57fa3a189a0e1c964f286faaca4ff	31	0	0
X11685b226bba275d408945203c01648f	153	2	0
X13964df529c8ea2965e77f7f324ee438	0	0	123
a2598b7085859896ed7f862e3cd8431c	19	0	0
aafc42cf974e1b091237a769b217c70a	111	0	0
X95fa145771ef1b362e7dacd6c220e592	0	218	0
be98398b508a3f4126d2eac24d69975e	232	0	0
X646a6352d517ae2d8ff313d8c555045a	45	0	0
a3892bded3c5b54c3b13e4de03327857	234	2	2
X48b716fdfe1c243d5504bad1ec0fceaf	113	0	0
X5b4c36e865faa6602aabbee52a7c8caa	329	0	0
a54bed715be87934260b31c081e52730	0	0	588
X8899751591b9a20855df974adae20abc	0	0	168
c59d3e19fc4588af2cf1857b17feab66	113	0	0
X01d5654ba1d68a5ab00ca8dad5cb229b	689	0	93
X2e5f33f7a8a36091155327d0b9f75df0	0	0	48
X7cec590f1535db26d66240f1246d0286	42	0	0
a332e7b43eafed8706e47090bbdf6eb7	342	0	410
X638f8ece85eaf81de860fb252a30dfc3	0	233	0
e3eb4381523df7672959c39e7d295bb2	105	0	0
dd384d2809d42331b6126296e7167fcd	0	0	73
X5dc1294bd8be888370895d3e6bc9e52b	1559	496	1171
e26dad8d1cc7e695b5c44e32911bf53a	17	0	0
efb936f7b4531deaaae1aefdd5a29f36	209	0	0
X8fdc5bd4f957f73e2232433ab899d544	0	14	0
ee58f56b3693b183dc205119b191cf11	40	0	0
X25ca74eeea9dff01b40d37471e6ebccd	109	0	0
X9dbd321d1ee7ebb1d766b48441d85e33	0	101	0
X3b200947ba602233cdb9818c27435000	582	0	331
f5ac31b0d0911b9b115b5dd8ac044e86	438	0	31
a810d11635404c605be5e5633d818e52	314	0	0
X33ccac09f2bb6c64bf9be19a955220b4	242	0	0
X190615647f6f468f1edcce09f620fc95	0	0	109
X383de0532d3655e29a4fa930ea79550e	0	0	235
X28bb8f1815fb31c1d11eeece782392cd	146	0	0
X45c9f1169d80aad500fa8b00e3929221	0	0	65
fd95730835ab11fd980cbb339f935fa1	0	0	38
X21e3021d81fc6f947f04505d38999bf2	379	642	732
X5ef23f12aff8f0fd4cbaa2be177b62c7	2	0	130
d5b774dc720cfd9d6610525252934f03	0	243	0
X257b7b1d367fb6fed7e291b8ba307204	55	0	0
X2c2cfbbdaba482138cae2108aa860604	14	0	0
X221f356c6ca7c5f3caffc3e8e84b9d14	11	0	0
af86ffbbf2389026f5c4bbbd53d105cd	53	0	0
ca1423d793dd8f00594a1631fd4e3c98	211	2	0
X73df3811dcb29089cf8fb8cf09090b26	0	0	17
df2410a981abbe6e930fee4fb0579e14	2	0	274
X067f4c3a1015ea4d3c923c0ed2dcfd7a	0	0	92
X6447cda84eac482fd811df1f0a35458b	0	0	27
X4e9e72f23122d577e7ea447c329e5676	0	0	62
X73e0305d72937cd0442a965eaa70f63f	72	0	0
X47e83f4cea5c38a36cc7175546213ea5	367	0	0
ddb228e4f40f2a0856705215c75ded55	0	0	216
c471739f4e807213dae58b8542820f6d	57	0	0
ca8ca033ebd7e1577e6f056d4e1078eb	126	0	0
X4d5d4e328ec968462f1cdc8ea4d37c63	17	0	0
X4b2fbfd55440a60f219752503a610fed	144	0	246
X11682fee71278ce9d6f18a7763018791	0	0	55
a7a87676576cffa545e5fb9c0db4dfcf	17	0	0
c9de570216724c7e7ddd2bc07cbebd84	0	0	74
X159077e0d08a2641f15859007554f7f1	0	0	31
X8c8605ec3355fbaaba4d4c8ea103c2f8	37	187	7
cf2c851fa1a111b351bb796569e4e0f1	267	0	225
X321952f34c0b526ce5fedfb67869c7e6	27	0	18
ea854f0bf0318a9216324de2c4e3e973	94	2	2
X3d0a196f85316e400fe8b86c4acd11ef	171	0	0
X2be124ce8f8425d98459fd9f6a58604a	86	0	0
a2ce6fb9e296986a56b0f46856117768	135	0	0
X481a3702effbe9f2a5917f9f4e1442e4	0	0	219
X604036c290da1274002e7d99a71783cd	209	0	0
c88f56f3304e7411c61eba0f3e7a71d1	0	0	68
e266f5dba0a0349e078d2b6d56b64d21	245	0	30
d3d5963357061f6b5551c1bdcedd9036	68	0	0
X93a1c148051b75a3c5e8b015c1f7e721	229	0	2
X89b5ccc2dd48a44d79f93e14e80eeb12	0	0	76
X5ce4b1d946b5f7c07d55890fdb10f9c1	0	0	77
bf5f3d182c5e1f4f819f00d5a270b657	0	0	61
X71d955580b8e00fb1bed9f9e0b887f5b	74	0	35
e3cbef03df95cf1c22cb5b2fa3ad1c22	0	0	54
e514a4da417de8b74646cb3ef5dbc074	10	0	0
X54d660c22dfaaf2c263d4935a8ad0d3e	0	0	11
X097fc0077e677f72d941f41b6719ac70	159	0	4
X164542aca3b6a5ca08f922a47881f2fe	0	0	68
X2a13517f497b7af7d432d590643fb198	50	0	0
b1b278d3bf03c6283506145cd44d2d1a	0	0	32
X51078fff3cfa0e075f4e59970b0758d6	20	0	0
X593cec72cf280c21872e8af692f3ad77	73	0	0
ed3a0fb1636c6564864cc8f7c0319c05	73	0	2
f38a173c9bc5a9460a97ce0e14ac6475	81	0	0
c8d23b66b9cbc688f6527a2fbee9cb50	0	0	76
cacc0b49dda027481af28c1d09cae9d9	0	0	185
X82028781003e2ae9a0ce3e680d1c047c	22	0	0
X558906eb5b508984bb6659c8132cfd68	0	0	28
f1a970d3f781c8d8deca9b92a313afee	1	0	53
X67f29efad54133dc524f2cc09c100b41	34	0	0
X5b45816770de21bb1d5090427dcd3947	0	0	22
a9b5fd3ce487ff7da3146c06471b6662	64	0	0
d467cf4f57031f502ca560d4d105d653	0	0	37
X96ed7dc936e7edb48a4d671f90d3bc53	0	0	66
d8d8407d6d23ffd99d1097ddd209ae6c	5113	1106	5545
X88becb78e03807de75faaf1463541e94	0	0	61
ce9de874be4397cdf6ea24d515138e34	329	0	0
dfc48b3e9bc4e3e6eaa8f351eccb96e1	0	0	120
X0b63b4fb97eed1a16064351d0d4bdaa7	132	0	0
X17cb3bf25d89655ffe109346d2bed410	2	0	109
c04c593e9155b8e007c82615ed624c2c	0	0	185
c8d6f7e2237dc768c373a6f10717db2f	29	0	0
c316c6d75f175a009bffe07c449d23d7	0	0	76
X9ff3a573fd79a33398016ae0760e288f	67	0	0
X4d03db660669242679106ec47e9aa8ed	0	0	179
X8c806add71df3cb5c6b96939396c5c3e	0	0	117
b83701119abd5d5f927a7b8bed4df258	13	0	0
X358137e3842a3fbdc361e02fad036e83	10	0	0
fcad949e1a90f634e8414de315a877ca	0	0	43
X40e1de241e8321b7d75b4725a3fecf1c	1612	52	1148
X82bf37cd5193d515963ec8a1ad9f9d2a	261	0	0
X1bc1cc8030e943b18ed43aa8861b5f6b	0	0	28
e680aec74c99efe0d91500290287bf92	0	0	84
X114ce9978be2933060e93bb03b8b0cc7	1343	165	663
a0c08a8ac08314f656dcc3ca2d9b1330	0	0	41
c417deef5631284ffdffc5eeb108a9e4	38	0	0
e4499d109c48a87d2cd58ce8107698d8	0	33	0
X054cb2dd6ddf94a41ad0a123b26d41fc	0	0	22
X8a3cd1203ae2fc186baebdf80100dac6	0	0	20
X73a92b7f8a355814d85714af2a3f38f3	29	0	0
X4b39dad9cbb23b2bc04b8e678b5652c2	0	0	314
X93d9f106d728065a6a529f683d01b1b7	0	0	87
abc6c09ba4938ed5507a5b8f7379d9e3	156	0	0
df599f5cb1f199d80f7d5b765ae10e71	11	0	0
X042fb111050cf3e86ca872b990fb292e	72	0	2
X51b37ba74f08e522cce002691a459967	9127	1398	8871
X0611889c1187d82972ac71f4b5f2c21b	0	0	91
d4c6fd459269ebfc3cf3e48d4f098e0d	163	0	0
X7cd27f8138a9733109d808435a616e19	17	0	0
a0d5e4149fadb1634c64689c01e26a28	20	0	0
e3e05c224702c37c93306e2753371a84	193	0	0
ce90ae6c9a49bf90118c024af5453d71	0	0	28
X549936ab1a60cf74d7dfc06d37f09f70	0	0	19
X9b2486e214e7a8e52e0363414d8c6588	35	0	0
af0d53a449e4cd75ae3a80e2dd053424	0	11	0
X00bd73830c23faa2aa618ad9c7b479fb	102	0	0
X9130938dfd3a8485c0a7f9aeb673ebae	0	0	229
X32c9ccd090b60d497777048626279cde	0	0	70
c74c287ccefb259d0ca28f7709307395	102	0	0
X8b2561dd5b9d035c6f146d04aa0b52a0	136	0	0
X5b8f31105d52b8386dd82f013c1eecdb	0	0	31
b2d166999e5d0cef2f546fd63792bdf6	0	149	0
c13a1cd12c617fa61abba35162493185	21	0	0
X5f07aa4397d65c3a3a018069a200ccfb	0	0	15
a6ea8d3dcc0ccc1b4d5856f883142b81	36	0	0
X05f6f50a0a6bd53a6582100584b1115d	105	177	242
ce2f21fb3591e49689a83e454ddf543f	0	2	315
X3c9f775809ed65a333b6e7c6d3b61ae2	0	0	147
X3ecd0140ed940ecfe169086d357d70a6	0	0	27
a37bbcdeedf03cfa6ce74470760fcf38	138	0	0
a7e9d61d350012124b7ca769d61a52e6	612	70	790
X71dd4c9d8d5dd5bad58b8bd827db1f29	0	0	164
X9a3c2c32f430017b65c975623215f0b7	0	107	126
a37d1ee1a2c3bd6ad92d43cf8b676501	175	0	0
X3481c8eb7c7f0e54cb60947ab247f85a	125	0	0
cf1e761e5d698784d51645ffa23f85c9	149	0	167
X3ae75f10f2226c88ed4f2f52a5b8bebb	450	0	108
X6482f1d74f544543a23df5e3c73fe029	276	0	163
f56b71ea0dc48129b4574098abb3bbf3	165	0	196
X5b2d03990b5d5796c3b213061a29c99f	0	0	114
X3bad11e18a1d57a077858c7a2156556e	169	0	0
f333f485969ef8b0db6cd5caa9834a26	74	0	0
ec8b49ff0430a735912ea30d47c31055	0	0	52
df7ab396fde19bf9cb21ba8ef5f90b4f	63	0	0
X5c5e8478a2aca9a1919611f65b63f966	5	0	291
X37bdb6625cc4e4bef2fe63b9d659c56e	0	0	149
X56673be4a445b961a9a485ac37b6a09e	102	0	0
X8d6d707f41e550e638697d55b6cc07da	0	0	195
f4e20cd4b1a7c6784ca4faabc35654c1	86	0	0
X40ab2d78c2a6f82a88c1a5bd8a8d3b8b	0	106	0
ed6fd7d78c49e1978382b9c2ab850f4e	138	0	0
af85ecd84b57ea5a9f4e696c7c9a44b4	0	0	210
X02f4de31c78a1393dbfe7a708b21ecb2	104	0	0
X074a862bf525d56934d19989dcd56dc7	47	0	0
X5c5410c50b15f3093926d69d2fcaa450	162	0	0
ab5f18f59606e9c7568e41422d364b32	85	0	0
X2eab81017e94e161fe3f8c8429401027	32	263	3
X794b51903c37af6d8dc0f51c85d66fea	0	0	263
b6bc40e8db6892695c447096a5d35224	132	0	3
X38f5084a7c5e51cacd724a825b721397	0	145	0
X3337a488e55fc2e0531242c8b314c958	157	0	0
ee431273d3a27a753f223b8a470c73c1	531	105	171
X19da7061ee1c5ac81a2ca9cd8a735458	115	0	0
X02d48b89eafa7edc3e29ade5173f1517	222	0	0
X76015c92bc61c5e6e6cbe6023398d16c	0	0	60
b840df037f888f79df8a7fa37c4e6fb5	93	0	0
X0f5f1cef20c6ab8cb0418e6006e26b01	215	0	0
X9af477f4112370c44daa685c7718e284	7	116	0
X0cc4bd48c0f8bb01ce301ffbc3904c1b	0	0	134
X2db6702d7e17196bcf4f55f607d72851	29	0	0
X0c113cfa3846a33ee18ccc0225fbad66	0	0	75
d53ffadf47fbef92af99d75b64cfa6cf	121	0	0
c4bc597e97f4fc7c7e6009da5753608a	0	0	97
X5d856c0f48e6ea87035bf01d152ea8b5	0	0	34
c3e301901926ff8a33c26d9b3027839d	0	0	80
ccec8ba5aaa487bc46b3c7fb5cde1a27	2	2	122
X43bc0ed2122430a3026bf7c8ad4c7a53	0	0	49
X25c562ea7f4e8d7c903efe5d67e057fd	237	0	0
b6f398d26bb31d0c65ea752db39bdb95	34	0	0
X29a0324c1cb9d81579a5e4f25eaf2df3	73	0	0
X999b725000f57e4c3578a15008458c71	51	0	0
X117bad27665bbeff3fc822335b49ec71	121	0	0
X88306b4b2d99d976b752881818a994f8	118	0	0
X508cda544b73426ed394c960171ba4c3	0	0	136
X50b1528bec3de487d573207f407757d6	0	0	177
X7b7b9b01cad97725dec32aac95a3a845	123	0	0
X4a354d54b5647c49e56c8a7d5fa95b90	44	0	0
X603d4839ef3ccaf58adcd2523c2603e4	0	0	65
X18c398f2483ea6832b67eb8f495d203e	0	0	13
e9cb2c13cc733f7ed4e5fdc8d3ccba9d	2	306	0
X78c83d848accac265b8de3f9ce382e54	126	0	0
X2bc5c40ac6f014728c491912f61bf9c6	0	0	279
ae7628cd8990017c3d6aa63eb5c582fb	466	431	0
X92e09fc833c478f7fbadfb5d25518bba	388	5	613
X9dd46f9721211f7052c57f5a2217babc	0	0	108
X4f2a0c8ac47eb1168c67df102dc715f1	0	0	163
X0f958ecaed00c6fd20975b2086ff9761	7293	935	5408
X65370ea7baf338e6519e63c093699902	19	0	0
X0a24ad778c34d082d8887c01547035ba	43	0	0
b6fdc1971da68e91429051b70cefdf1b	0	0	34
X52d4a9ac19b17a364ced1e5301a27909	0	0	595
X0416f386d1b4db51ad9e6f8b575b5727	182	0	63
X1018f5d61f247b304c7036676f623390	145	0	0
X2d631853ff30904a228954efa9050b7e	148	0	3
X847591def19ebe951fb1239086029e92	249	0	0
e1a03295c8df4cdb91b6814c9f304dee	466	49	509
X87ac9abf5f5dfcf8659cb203f30dfe89	737	0	0
X5774d9a64cce0f065128adaeae73a8c6	0	0	15
e0698beb7d0dba50b66fd7d24f92fc57	0	0	97
d2aea66fcb3b6cf412264f91244c5f3f	2	0	40
X456ad1c263cc6119ed001b00510bdab3	163	0	0
f0f9e5f86430e52a2b28db4ed96ba1e3	0	81	0
f5fba7fb66ab146d60a129092e6da864	154	0	0
de6f05375eacfb1749c388a249d90f1a	0	0	141
X06066e6d6344ad3b4ae8f8623c2669de	0	0	71
X189c47e0bd84955f132dd5f1a74aeae5	0	0	77
fd5f01f8d6056fda36737a18aad3f46f	0	0	153
f351595265ba53ae9405ef2fceac36f4	0	0	137
X7ab593dc9ce8d94fdd1ba51839aed048	0	0	131
X7e665a9de81ed20cd9874cf2e32cd98a	437	0	3
b3543a17ee6c54c1e28808fc1d8e8e6e	0	0	11
X2da8292086a5273efc27f2fac485b382	127	0	0
X7d5ab7ea7e738505410f4977f31be892	201	0	164
X8ff4a3d0b19de9b3a1e02ebc7d0ebdfa	0	0	126
X8e8f9eccd8524c4b741e8e4ee3a3115c	101	0	302
X0907004e88ffdd8a4fb4b18c3f8dba23	17	0	0
X3bd88ad40ea3d5714493601338f972ec	23	0	0
b9ab144efa4a5bb8f4cec40fd4c171ca	0	0	104
ccd14f7bdb70f1f2ad7fbff7652410e7	0	0	184
X3b9f6df81d64bb8be27b81926d9bb105	183	0	0
a4f6023b1829679da7ea23693944a92e	10	0	679
a76efe23d0ab38166a7e25c30ed24af9	0	0	99
X0d6cad60be56872c5e201be6d471480a	0	0	105
X9a00a9238aa36613e967a352b5865af0	12	443	2
X511552a194733479b58257032f29dc49	0	0	356
X4a1ee938988eb49f1ea30370863f5393	0	0	126
ce7639fc6782dba4fc16efcdb70a0eb4	0	0	72
X39b82d929885540e4ade41188173c124	0	0	94
eed026a47bf9134ffdb1326b8f444ea0	0	0	99
X10fe6df932252344ceb06abb5ea5d642	0	0	25
X6747a1fa2604806c5a65292be0658166	117	0	2
e2d8c967b7fae89665eb99e9f43e58a0	562	0	0
X7b1a3348ae0622b879c3067e4efa255d	59	0	0
X565602675b07f5adb691385e20b6ea85	189	0	0
c9b0280b9e8f3c08bb2b122df094adba	355	0	236
cfa4139daf072cfabf2f120075db316f	2	0	74
X663ee5f287f1fd254ead7ad9a1c0937a	623	0	55
X5984b612b2dacf00460404310bd46447	61	0	0
e306d9884b237d9687f0f9c0d8d5493b	109	0	360
ed1c28366a5c4d980816c2ec93c71496	122	0	0
X2552eba721ac8e9503c777d783cc522b	0	0	294
e9e7ad5356eb4129f01a95a1db82aac6	0	61	0
d1a4376957acb5ce889b4ca180d53596	1273	4	716
X6474bc3c1dd15392c6093a59d0df9ac1	1475	0	866
X5a04759eeee8e2f7f68b92abafd08d0d	142	0	0
b624348471ea392dc13802d2be3a4fc0	80	0	38
X4b1d65aa82726b5c7c5de58ee7a2a3dd	81	0	0
X0c28d19539997fe62b63a266fdd8f150	305	0	2
b6bb5ae193e716c0f0e791fe4b8b5bdb	164	0	0
b886f05faa7820a707ffd0a1f8943cdc	0	0	281
c72f91bdc3abc62fc82e4c42d258465b	0	0	53
X80689fbc6952acbefbb094d967c30809	0	2	159
X5c9cc8356e2ad720ce791f7745ef6d9d	0	0	38
d53eab1f2a62ca86d325b2a607af5bc2	440	71	10767
X96f9e76d35c5d584c9835d0e1e98e69a	0	0	209
X8b25b3f92aecc7bd866d3f18c23908e6	216	0	0
a84cc16fcbf2d9133e376bcb91fdd7c6	3	0	1014
X526b405417a21be135ebc75b47f775da	1817	0	0
X580cf5cd9ec07166be25d5277e0455fe	0	0	160
f5666546449522de36b8623ce592655b	0	0	207
X05f7244f46c82f841eae6128e936af57	189	0	96
eb3cfd1baeb1c9bd254b583c2ceed33d	0	0	114
efd15d73283842a3644131a225cb7868	50	0	0
X6a8a0e365c1335065719c2cb7c566637	183	0	0
c9566187d5ebb8935325fd0b2e9278d8	166	0	0
X5696d9436810462e6a8c9cbd201e53c8	3	0	379
X42604d672b1cd97b015594f010970c9f	0	0	1032
X669f9d9d54a82769d30ddbc7c5f6bbf6	0	0	119
X94a79c8f181e73b2daef3a22b213eb90	896	0	6
X6940e282504c75a4f7a4f8a954c02e35	0	0	20
X2828f05d1021ebde021bc7abc3107ee8	0	0	60
X91ea3c0919aff2f8c408ee917c58f2cd	0	0	248
aed4db4b8b80d01a79f87e461930e940	984	0	0
X74bbdc255c7d0661b3f7eb93b5439f14	0	11	0
d216bb81f8fe8ef96abcdd2bf6804521	2213	416	1854
X1cdb0fe2c8e8a0479c9c7bf6c126b33b	23	0	0
b8d00189ab863bb8b189ca80a819ae4a	17	0	0
X45c2629578a39bf7e55383c3038f93cc	67	0	0
dfeb4b1aa195aa494c62a2b128e1f465	69	0	0
X5051ddbf45e67c004ff129fdb65d15fe	18	0	0
X3ad3bab68b9d5dbe66d0e7d2a00dc2c5	0	296	312
X5ba71457d0fa241384b9e8bec74886df	154	1	282
fa0000abf01662ba5dfa0e96898b94f6	2893	1	1861
X304ff39fa37485a2140f251a0b8d4f6a	0	0	85
X09274b1b04583fa11208bf9d178897ed	1	1	370
X9f9e600ab371cef03219ec961e8cd57e	304	0	0
X2c0a9de2b203c9ef7600fb9c1577050d	75	0	0
X43d283c322b4c44a259ce2879303e759	10	0	801
c134ec679be7d5882a9a68fe915835e6	0	0	393
X0071240a825b6e93263a8a3fb276badb	123	0	684
X641a83692c490ab3827a2b675438f392	5	256	0
X9c1ad87756362f79b5ded010da703603	0	0	189
c5d0d3867fcae7c27ffbaebb03ef3544	0	0	166
f0f57b20026fc59a8af9af5c1a205ae2	0	0	42
X48ea8fb3f80bd4544a85443246849979	116	0	2
X055f2e525e01de4d646aed1bae566116	234	0	0
X1db349f4923a3a6362dab318ff15d784	293	3	3
a69a631cdf8180306c7bb8c18bd0fb3c	7	4	673
c46e503b6dc19afbaef20ed82fdc699a	298	0	0
c3ad6120440b1d4177ce12d56133ce06	20	0	0
X91ecdc1529095d4d3f4de8016cf137ba	867	0	121
X45c81fae169af05c56e0e8eedc9463f5	376	0	0
X5856d361d1743f8b235b02f265805212	0	0	16
X8954eb8be339e65cdd3e26cb04f5809d	0	0	148
X525a5c2aae5a3e094809f9f268e11cab	158	0	0
bedce9c336e29e1a28df4fc86b4a235b	0	0	73
X5365fbbb97423d19e87f3121f8106b25	85	0	0
f0fb883d994e2709f0ea153adf8b78a3	430	0	241
X6ba85a20514d41ef6a252f7a0b8396f4	2	0	209
a57fafbd92ff75eb21218eb3986125a7	4	0	313
X1dc88ad95da61bb085a242d85bb3eda4	0	274	0
aa448d6d213285d7b900c6346876f1e4	0	0	52
X2402b96b5fab64c539f4c7c9d89db430	132	0	165
f824a21207564599a92f4aacb79b1d6c	37	0	0
ff6a5df54eba8dea85c052a69382d2ce	12	0	0
X93a8074ce210619e4ee6622791069869	0	0	141
X14e6146c7eee0c9c9d7c84e8f72b891c	226	0	0
dca1d3bea4096e5ebc29464c14e64dc5	2371	85	2139
a07c3cc24458819daa563fd0fef90d69	112	0	0
X30be764e8cedb77ddbb7f2f9ba6722b0	0	21	0
X87468bc2dd597e44681877469be02102	0	0	44
X753275ba459bb5849bfdab46acb17508	19	0	0
cfd802c90ab74ea706a20c5cd50016d0	0	0	76
X705d0f0d4eb6ddad91b4e9e336252b75	282	0	0
e95825f8ef1ab76c505cd1c1f3a1aba3	116	0	427
d57bfe5b63d9770152a0d6be747e12cd	988	0	2281
X746c99b14ae248f6d0bbaabc23772fa1	245	0	0
X807e1b5ff418b80021a34534b859829d	0	82	0
X9ee4c62653dbfdf71f346ba3506b1762	1625	0	740
X70fe6a5dcc501d3e2734270a232fb1ef	127	0	0
X8f7d2f00562307b09470859a6290ddbe	23	0	0
X6fe9113d86625cf549cb320038b2832c	402	0	409
X40d068676cbd5353896dc5b9707efc40	0	0	33
c47318ad8ecb1cca857bfe83548e6203	0	0	20
e5ba639d00237bac5b690cae4509ff9a	38	0	0
f1be7908c0c135959c20b30f6026cb0b	1301	627	10941
X8d426fb9109584a093f74cd1fcc6a7f9	12	0	793
X41cb857b12adb7183cf6305f3b8491c3	1486	3	820
X98503465b10a2e5c16e4125512d8482d	231	0	4
X3168fdcf062001545318ef825a405c8f	133	0	0
X54260a956eacc0743c7d4a0df2d9976f	127	0	0
X36f163d6fddaf37f58fc8b9e1751b643	0	0	17
X369259d24687bc321944e4cc33d6a472	77	0	0
X3f39eee0d7346d507bbe32e6e5f304e5	166	0	0
X63a8b0fb55f4c8f8ddabe91092d5e944	0	0	184
X20401381199d9c0b88a429a97be26c45	163	0	0
X53f041899699b3c78ecb172e0815ebf8	0	0	215
X024603a18c9b73c9ccd25335f8e6ac19	0	0	28
X10c40814f84a22246bfe8444b6318491	100	0	2
X1c0eca29ef2a427a88526cc2ecd3ec20	0	2	168
X3638fff046d1c1b73a8141f2ae6b998a	626	0	0
X548a52718c16b6244bede1e82656f7ed	112	0	0
X3b8a6636be3dbed93c963afccafd11d8	0	0	170
X07ecf1b93b697918eb1e1bfecfeb9c0d	407	0	133
X490414f5ee0a9381c83eb6368996c6fa	15	0	0
X3bed5605660e28560e1827fd23b3fc75	11	0	0
a6ef5eac906ddd2ed8c5f76213997d83	515	0	267
X8442b2cd4513078f56ac0f6a732d97dd	53	0	0
X5d0a645754f9fe0a63fc780ae3f31662	216	0	0
b94cbfab64a9aff8d5e545088c036e32	15	0	0
f6e68e2263c3edeeaf9f4d4fab66dde1	241	0	457
X47ad22acebfbcb9b70b212e5a110c834	160	0	107
X9b53e771f7f1e80370d46bcaccd50ac2	195	0	0
d3aa786034d67f30926c1371e3840d96	2	0	105
c1fa1856c56f8c6cdae2afe0b96a2e82	0	0	47
e9e49f84c6f1427cea9c93453834692b	0	0	103
c0b515f411954e456db83b80a7ff9b02	187	0	2
fbb060d15f2dde9979fbcdb03a0a3f49	0	0	620
X6753f76aaaa931c60f84743adf026802	44	0	0
f5e1898a0cce263e39f9d4e1c4f1efb6	202	0	0
X9e4c4d8130f3bd65fff8eed698607d42	27	0	0
X9cc0e8fdcfde5cd76894c3f3549a1563	325	0	0
X7e33085b1320bda8479239f493f77c44	2	0	127
X08d43e6d32f4949af02a64af2293e0d5	0	0	624
X08b3313ed16865d405f2c53dafc2142c	0	0	355
a77d751bd060b05b3f6c7248740e4485	1464	0	0
X67f2c0890153265a60e8dc2387a53e84	67	0	255
X18d26d44f80e444e2e5c643259bcce6a	0	0	32
X168e722bfa79db9781168c3209a92748	294	0	0
d931ff6e4a64ca8c8063ab0178e601ba	0	3	61
X2415d2e77569b308cae7bc23397aff8d	832	2	476
X9c11f5f18f9a0305757ce25c91743c2b	0	0	53
d98c45ce2c6ebc22360ee2ab903d2513	167	0	0
X603300f992427c177c075d66c0ce6674	3762	7	966
X3ee904e05724f6184533d55247dd032d	0	0	98
fb6261ed8e16def93caba894cc334b3b	0	0	30
X97965a9654191e4f180d66143f59ffae	0	0	106
d735b96e719ac60d2c0929f7dea0ee83	0	0	145
c5158af323e8e55b7b9d0560ce07e6d7	0	0	115
X824f6ec711c73551e8506f92af8b0d8e	799	0	2
X12c5207ebce2fa2b8c897a7f709e8923	0	0	42
d92bef46ad0be85dfa0995e3f37c4b5b	103	0	0
d3119c68396914e62411b589585d73d6	817	0	137
X828c662b0e0af21d884d114de5776b2b	144	0	24
X2f55d8ecb488ed926fd442dcb6ebbde9	85	0	1434
X147351315056a60b065b42545749a2d0	4	0	161
ed14c5eebf346bbd6e8dfac6da3ac941	0	0	68
X19b38ba56b515c0d61f588beb652c08f	0	0	91
X7407670bc380d0d1533b728dab0c09ed	39	0	0
X7364410825e5216052b33f5ef568855a	0	0	528
X1634d63d3ff69789a779a76215349463	209	0	4
X93eece04dab14f85b6822132bfb94e1d	0	0	10
a8dc5d121f782fa1b4c633bafc38612e	0	0	215
f53989f6cf80501e9dc0d5494dcaf4f9	0	0	91
X20938fe33069b9bb69a4e57f59b4fe35	0	0	230
X5d091e4b8dcce4300f743b1affa2d8f9	428	0	291
X1920159b48fa9edaea3bca005deb30cc	84	0	0
X44356e11575f69857d38ff45c62e7797	339	0	0
X8cebef5301827d37c2761f60f7df6f34	160	0	0
X4d877bc3bab83ce4bf6ca7b177fd7552	491	0	6
X385b2a78d177910f64e4612a58c339fa	213	0	0
ea2860ff3383f9e4e76f152517de79af	170	0	289
ba249420a8ea7e79aa002f90a8173e80	162	362	312
c38e90a3427691bba878cc41a84e9ff1	49	0	0
ca923d78eb973be6d7a5193abab0c65e	71	0	0
cc4aa72d7b4eb25700e10f92cc3eb09b	66	0	0
b92810f221b535db8faf50f985cd6891	0	0	220
X2592a1ac4adfb1a5186dd6159eaa5866	1385	4	28
f87f0aab87eebd8380e7770768461231	13	0	0
X0f109ab3fab2c7921a1b060c6adb6e87	18	0	0
a99d1b1f3bb8ba6a659aa0880e577d0f	0	0	102
X875baca23ddeba0dc258159816b433e0	426	2	0
X01008b9ac47744f530c0ca5538e82dcd	173	0	0
X14a0bcbdb76d6d1065f76b31aa35e4aa	753	141	1537
X1b6d89c90383300f0099ec17e94a3c76	416	0	3
bbba5265cb217add5bdac5ded28e3014	133	0	0
X48fe1aab1894f3df762be9a8c4345c0d	3	0	299
X217e344fb854abdd40468f0367ed1a94	3	0	63
X29b583789e59a52d7b90262c6f5c6066	366	0	0
X5489f8955dfec0729f5bd52a916c4dfd	0	0	140
bcb8c8ffb11a414a05e85a3e8f7f7d74	105	0	0
c7c82125cba858f5d6204f23b194765d	2	0	43
X8a6350459d056fbfe29b37366c1cb032	0	0	19
c66e35ad5cca4b1e14f7bb05086c6f67	0	0	251
X2cbc582a0e55088876ba80d8f52a1ef3	0	0	136
X2f5ab3b7335e78ae31ef20dd71fe5cb9	117	0	0
X7af156efafd4780af3ff474960b69dc1	70	0	0
c90481fd1d036093c9df77f8cc11b1d8	337	4	829
X0b8bef13e8772b2009ceaaac1fbe1044	0	228	0
X5430a89e317d13a4b0a906f95fa23ac9	3	0	286
X472b3fa70ff02d27621ecea1a7e122cc	156	0	0
X6f0dbd8e625329750e9a7ea3bd187ca7	82	0	0
c5837dac07de73ed11bfd9fa364b604a	134	0	0
X27bbbd25515a5e825e9b952f29a05843	0	0	157
fb5a9ade842b5b785e425a06e0033714	0	0	59
X4ef618123ea81a4825a651b4521ed93a	0	0	34
c006676fa3c68be778aeaf2666041414	42	0	0
f9a9f2350140bea26c4acf8cc3ee37be	99	0	0
X51900c0a7d998d7a3dd3d613e9edfcd3	0	0	301
X508e26fa153fccb2a771a3d74a06b04e	1337	172	1295
X4fed73ca34526f7134451aec41c54b0c	2	0	176
X7585e6d02cf4d4c7f6b85bee974f3e0a	118	0	0
c7af3ec3be3efbca424686dbefeda908	0	0	126
d0c92afbec54523a72e5ff2313a2da39	223	0	0
X5223f9522bb1ce03756f8bc5c7c7dda7	0	0	19
bd59be1e66a0ae1f5157d081c2bced77	0	0	34
X63a1dc4bb4fc6c948cb4d1d003f09d3a	3	0	404
e89244daa2d57a37ff4f01e3a19c6afb	485	148	1728
f2e89f62c7f78c395bff40722743c8da	114	0	0
X020d1dec4103b2162d94c75b29457ed3	99	0	0
X842d360933edc94005b24c5b8999dcf1	0	355	0
X5ce0922ff8d8c8853014434ca7fb29d3	2	3	375
X5f434fec694dfe3d0663ae85f5d961a8	2	0	258
aadfab3d62d521aaf65163e48d0471b8	0	0	125
b306adbc272972a34d3b196e7d619cbe	0	0	16
c1be463acceb55950c6624df6f3900e3	102	0	0
X0547ca9b73519442787b506437bde1c4	0	0	74
X6e48da267f328d1822ffed9c23302350	5	0	267
X889599e38f50289e5d70d060c688f52d	166	0	0
fc99bdcd4b06e7b0a25c2fe44a3a989b	0	0	101
X412b195e9d0adba3038e7b230f6bdc51	93	0	0
a0533626b74235b5d4ecdf1e197d939a	0	0	28
ee86735b0e6f78d83c76e7464f73bca7	0	0	185
X159700f4e95dfd28abbe7a967820f224	64	0	0
X10c58f89eebe5d3096a2dcbae147b842	0	0	62
e6e4c90961dd66020256eb7f1480fddf	60	0	0
X7fd336ef173d22282148de9f4a95d91a	0	0	111
a8c3cc978b8e4752dbae7957ef86c087	0	0	54
X7f9663b5b3941d2e4dbafe50c3d9612a	58	0	0
X8255d64b4e2c73069680da238cd75323	16	0	0
X5c1e5f3f6428283951a8bdb33522bb24	0	0	80
a376a1c3646440f297aa29d004c2b117	0	0	55
X7d83c3a5e07346b3625eb35712085476	0	0	131
aa1d31430f46969c6280fc0d2f73f16d	76	0	61
X3c134a05c0952b1332b8be82cb96a27c	12	0	0
X05fbd404716517d074c776c9f46fc83b	30	0	0
X256d38ff24fa64deaef837e53e1d2b80	0	0	61
fcc535b49a14620c34321735f18ca86e	284	0	0
X59d0a2675a6d7dd75270e685b5a1f0b7	97	0	0
X60561796d71aade122e4316d45518b64	101	0	0
X077f30f741b25828cfdf5795f43264ba	0	0	71
X4a88329053eeadcf02683f6348e93b8e	430	0	0
X0da1b43946a6ded8e0a078c6fb8861d8	0	0	349
X44b0a9bcf1b44984259995e7f4687eeb	410	0	269
e628d11eae92935eb1c0f220edbdca1a	644	534	939
X8252d506594b86d04dc76635505a12fa	17	0	0
e8750589ab9887152fa975e283c92460	298	0	0
ccce542c63feba057e63b3684c5202a9	0	0	102
X1577d5b29c2b1381b377be3063e4059a	0	0	245
b9ad65b8b4bc5f641a4954bb0bf8f7c4	831	0	401
X901d88db2da0b0274b27fb95e5718818	12	0	0
b768f898896e71018ad607138c3a2a40	160	0	0
c14caaeef25a026f819924d602f1a943	333	0	634
X5d44fd3d235ceb5aa3457e2a28e39b37	45	0	0
X63b583bb552faea5c35c64b9a7b74ee0	23	0	0
d23fa85a056556a0b6613ca08a75ec86	0	0	94
aad4ba3a3872e18788b216447ec130fc	21	0	0
X4d219c1c1e9c4efa86d1bf21922760f9	306	0	0
X258719984ed1354f6f7c8006911eda8d	0	0	29
ddf3cfea33d7ae755b36d3dfe2b049d1	154	0	2
f3f8a4080afda40b013f144b8ed6f682	49	0	0
ebe4ea21f816084c355f7763d71eb829	426	0	0
ae999376c5fcbbe06bef995c74889950	1770	277	1975
X9d25fa0463ad89a61cc32fdca9815c8a	151	2	0
X2f0b31628aff841e739e85f0f0e603fa	0	0	49
fca0ffd31dd158d5507d80c11941a96a	0	0	212
X32f0e854883e45b1b42e01304e6db6a0	0	0	11
X7bd1cb066803f306549f829d1616aef9	208	0	82
X18967c350ff9eddd26b062512cc3e529	50	0	0
X14d3748d8a615d42c685ee582c4574ae	132	0	0
X21356d169d004a701beb625d77d2b0ab	16	0	0
dc672e80a03ae10b5a3fad0ed686a39a	157	0	517
X7f294c6d0cf2de99c96d1a09937bb2b9	15	0	0
baf6e005a7c77902807837ae2199874e	2	0	209
X6609f69001410a57b27b8000727a43c8	199	0	70
X9f65a140ae971822b09634598027c712	0	0	33
X3c245bdad6a5fedf817f2e143daa8910	0	0	239
ebde98f90e57534e215f848690408cfb	0	0	382
X69aaac14dd8cd164823ebcae51a805bb	0	0	39
c89b145e4786ed05d5617f5607d759db	175	0	192
X5006f3008cbf608f4378afaa073fcbdc	0	0	31
e1e51ef1402fb4450b8f801cea00fcfd	0	0	11
X1ee6d78fac84e9ceeca1b7a72982bd73	0	0	59
b2610f32e3bc575dbe5125c0a6ad57df	0	0	10
X3ee296646d3a92b30b74a146209a0bd9	2552	0	1313
b42d41039f3d90f4bea445dfb09c445b	14	0	0
a6790e2ee03b30b475554564a2daf7cf	0	245	0
X0b2ff46db13e4a1f2ccc9d127b7ccf2b	38	0	0
X949f3e8fbd0bea7ed0ac1423845a8471	24	0	0
X0fb241a70679424cf726a0385f9109e8	71	0	0
a5247ccd19434159882603fbb85b9550	47	0	0
X83e5c9e4521b620fdc4b1582cfc043a5	0	0	81
f5f2554cdf5ab153aa3f48332491fe4e	57	0	0
d0c7cae655ec81305ad95607ed9110a7	14	0	0
f5c6a5f3f4e16fdc43fe0c25a1dba3b6	35	0	0
X14fcb72a41272ca55458f9d10cb835c5	2	0	142
a714c935bd3f5d420ff2b361c1d75c28	22	2	0
X7b60f8317a3a124f6835bbc2c2efaedc	2	0	0
X2e4438a2a604379cde0825e3b7f8c7d5	123	170	698
X8ea954a2cbfbb62b858f9f7963b39708	64	0	0
X949d0726cf97b07f9893917093290458	225	0	0
X0a23768616083cf041b1409bd6fb6b3b	5	0	354
X31d10fcb8c32ab55b1f4049edc121ed9	1687	296	2611
X1abee26b96aad69197a68ef3ef7e308c	68	0	0
ed0caa54f8a4adde08a170b462864e93	62	0	0
X641e1185fce16d2affc0ed48b8b99650	0	0	72
d61575623d7cbb853db108e3ccbf80ba	0	0	24
X28cbd06baac9ea0f276c2d42f32dbefc	0	0	128
X92ca570b85f17c64664f0459790aa0b3	92	0	0
a6635ae1ca85956179ad19d16a1fa7b1	22	156	0
d18dc7e15f9099abec28307984cae842	339	0	890
cd6994b9c6d8ec0c5a120fca89aeb84b	0	0	44
X9a2d9b2f5a6426cc88a2bb6fe7e39244	85	0	0
X474c2bd9f242b1458e63ab449bc3ff48	17	0	0
X9ef8dbab550ff4d7855e027e3225a5ee	138	0	0
X7ab5cce6ee467ab3eac237ac1e8a9557	0	0	467
f54c0157f009f023761b373dd65073d5	0	0	333
d64873afe6fbfaa1284912157511a31c	162	0	0
X8136653a5196a65f556960adf2f820df	0	137	253
X86927ef0095288f65fb406faebaf77d2	0	110	0
X292fde4998651a7a65601a8761af2226	3	0	354
X53630294875b5e67880dc9749456d60e	3	455	2
ef77f1b00e91efb19ad379ee7df24292	0	2	287
X1c681c46813d06f7a2acf632b16f8237	13	0	0
X3737f17e5e4b13f1b1d0a6bdd2738fd9	69	0	0
X01d8baa3293392ec1dffbf0be21435a2	116	0	2
b0e2eb9686f092c20dd30d5636ac519e	2	0	30
bd60f6b22aff4adf5e5ba18d488b3153	2	0	976
X3220fd4c5e856fc915a24d8f22c3ed1d	0	0	130
X2d76d3a94de2cd01d863ba5e8a5f4939	109	0	0
X55e9de637831b7f6afe8f4760b45abe4	0	0	63
X2e14c9b40e0ab6d5f7e51ca37a63d6a1	564	0	168
be695d79809d464e555f7f62600c6c2d	0	0	34
X685935fcdb287f7f655ba9b68ec316a7	98	0	207
X3afd9de25d1748d6470614c317336d0c	0	0	22
de6069267862468babedcafc354f0cf7	0	0	156
a04b1aad558cb736e3a29ab1edddc8b8	211	0	366
X749f20c522998e7b4527655c957b738d	319	0	18
X4fbc2d2fe850340835fb4aec78110c58	192	0	0
edd4677ccb537048bb84023fb63309c0	0	0	24
X6c9aafcf5d7d4da6f3cb422d8bf8d569	0	0	16
X4287262f26ddcd1150bc3bc82c68e5ea	426	0	49
X51ebe774bd1b9acb4b280f602373d66d	420	0	501
X1c9798aaec1963950ab7b281cc049cd1	4	0	356
X5128b11ccbe28e6122907adf931b3cdd	186	0	0
d74a85f1f7396c61c967888debc3c2bf	4	0	184
X1eb3d088c0d69886da8bf37e73232f54	122	0	2
eb9c438af03cb1512d94f20c52e6a2be	5	0	172
X8b5501aba8ebc3b60c6f2bd00ac0fefd	128	0	2
X31ea6474eed3c65497c846d7e48aba79	0	0	226
b746295175fe2555c980ada77b2680ea	439	304	1381
X575465d88f23f55b642499d53e2e64b4	709	0	365
X4825bdaff67540fe12bc6526a514afc9	82	0	0
db96a8a190438744b89153ba8aac7a0f	301	346	3
X37561bb05e65d51ef7efeb92cd6cbb36	79	0	0
X052e658656f0d0f301d2e819b833ccc0	0	0	67
X5c55a6193f61cadfd2ba36e5dae5623e	0	2	192
f3ab58e2948bb9c4fa7acd9a64e6853b	0	0	296
c780fc52a7fd9bf2bc3da8bc62978a0a	0	0	160
f086892b0d93d45261c04e95720f326b	167	0	0
ac2837ae133be18c2bb3957b601051ab	0	0	73
X19334427543f953418e24898e946cebd	119	0	2
X124ad44735bbe8467b0692ca5deb1b5a	32	0	0
X008364a644d8bfe7a2432baea5694b05	2	0	277
f0f7e84ed613291951304688ea31ba32	3	0	303
X7aaaf4b87f0a64f7d6da1119f201cee6	149	0	0
f9e6a03cc980024031c44ba872f99f46	38	0	0
defd24f8b62bcd38a33783b6c8f6c16c	123	0	0
da50a53e01629b2434f954a506e11694	47	0	0
X7474e15b97a13c037713485960ef89e6	0	0	115
X09010f815701a3b359d164ba619ca045	0	0	15
X664e9b906e8c824d4dc3c98e008c68a5	139	0	0
X011d0f169d6c3281f07e65ee6509e49e	22	0	0
X3241800aa8a222a41caa85d58bf370bf	639	154	582
X6d23f27676f1fca0538d2befeb158e8a	0	0	40
X86e74ac673d87cd022d164e94b55ca48	0	0	131
a4fade934c41f5e2f2109b6e8d4b2f69	1044	254	757
db0f14475cc6fcaf413e7414d7cc4c91	0	0	92
X6d6800623b93b32321c344c0f23652b1	0	0	174
X7b85ac8a3b2c52eee2d6f408055cf6aa	176	0	0
X909f57a7b81e5dd85f8cb828125ef802	535	0	990
f4602ae4bab281c56cdc543f0cdc1053	0	0	38
X4ca6325e824f8112ffc3c24058e44268	0	0	170
e6c7bf24a76611f590c405edb3bf9647	27	0	0
X536d7ca9aa466bd632782b80d3eb6a46	0	0	133
X3b45013ea42eab213783e8dd3f362ac0	3415	1348	2674
X3d7b82e45a78f2e781fa67f412027400	24	0	0
X0cbbcaafe3107590564d4e8945d347be	208	0	0
X73cae6d6dff45b2269f3ed34e10b3ca8	67	0	0
X18c578b4ec6424c1e14240789197cb69	103	0	0
eea9316bc774c5ccd05159dcfbf7d22a	0	0	254
X796b4eeb9d12520be3ebaf147c2a4f88	514	0	234
b49f29f0a8d50c69d88790f6e2abe65f	0	0	151
X3c57dba8d53fa3229a3fe41b34d06d2d	457	217	498
X681ec5c429a9300ff8cdb08fd42501d4	26	0	0
X209fa97b26f8deba34040067d1819f96	0	0	98
X77e6f173fbea9159cee9bdff756cc06a	0	0	103
X34cc472bd6dc026d3ae9507ec70e0b0f	187	0	0
a3475803e3b9130f1c89e322165984eb	80	0	131
a5a73733b9e8be213fc5dadd15ab7b60	72	0	0
X5f52b4a21dd58726714d7181bf03bbde	38	0	0
X65e8ae0e9d96f4747b727a41ab782b3b	77	0	0
X18459b5c834bcbe2ac5c1eb872d1e285	0	0	38
X5ca168d65eaa084fd77ac6c63caa6613	4405	1567	3018
X17136260f1565b46c5c07fd5d12c75bf	0	0	18
X3aa30a2099c72984cbdced2fb9b582cf	78	0	0
X69097fa900d31b4afb9068de3b53fb5e	275	0	0
ac733869b363e90b1854c3008e726048	56	0	0
X1f1c485c9c7752f90befec38aa6b281a	24	0	0
X78eb6cd628ccb837834def0627a59dd7	184	2	0
X5b151bfe27550126b1df0f2812981e6d	68	0	184
bdfcb276f7b6443bf2749816f00d7715	125	0	0
X4cf4b0d6cef2b9b1c0c64ea126276a99	208	0	79
X805d1af20e92ae0ce8bc9124be1bcae9	0	0	89
X4f6ebf4896b0b890ba2bab64e75bed9e	2	0	14
X32c1013c09de7de7c8b2a59b0bd2bddd	0	0	23
X5c3e8617f4b1f5d30e0dbcf6987f468d	64	0	0
X4b7f46435354f993f2160b018e234ba2	97	0	0
X6660e35de77f2004ba0d1fa1b1acf771	424	182	2
c9822b3f9fd82c2ab984eb336c12f40c	156	0	55
X797925f50bfb2c5dae6256d8e31bfdb3	46	0	0
dc096c242daba7e14706402c10b30929	70	0	0
ff5509d5dba1af693e702583ac9885d6	82	0	0
e390dca1e5c82067ed51d66c501ba121	4	0	678
X1a3dd72e05a9235ec29d52ffaf2382e3	5	0	370
X98c4809c8cf837cde45e7f01ced130bd	24	0	0
db38f52f06ba1932fa1b7e22e6813528	51	0	2
X406ffc7244b5294b16b8e6d49874dc99	0	0	143
X6d82c026de5aaa35cf31e990199869c4	0	0	192
X27e51abbbad414b3091a056971479d33	172	0	0
X50080bb639f9fe810682b9f2742d3ba6	0	258	0
X874e1b88174d88aa9198e6cc6c98a61a	0	0	65
b763d6dae7797eff24ab8b484d999a66	210	0	0
X66fcd749c1a51397dcbf5f0e448bf741	63	0	0
X45ccb92b12cedb48c6386d150a6c5240	0	0	183
b9ca4ab477bab27869f0edfdce5d4cdb	0	0	163
bf595108a91bd2cc69b4d8872705f96b	0	0	57
X7e551341e900e32ece63a1250dbc3ee6	0	0	32
X56652fb34d206e7ac52fcf03aa205777	0	0	187
bc77e327066dce75e2cac0c457768d71	2	0	137
X759b9ee68c34ead5e88da0b69b639c0a	0	0	138
a432eb29b188ce4207596b39095ef067	51	0	128
X18216a5b3025b75c4513a7d4ef39c426	932	2	0
d41107a2028b46e1b31f241801220a38	39	0	0
X156f89ebd711b496854d168b95489753	131	0	0
X14cd0e0c102785768abbbfece831a083	512	891	848
X866788800fb7e942e8ce45dd8dafcfd2	112	0	63
X0297f172847f6fb0be5ce1b5e804f1d4	179	0	2
X15151534d320169a2bb667ee22cb6e3a	0	0	70
b936e14f62ec806fca56278f6c5e549a	539	0	173
X9065ff31d36255aad1a94f49bf252ba2	73	0	0
X84107ddc1ebba753c90666b5fd207507	0	0	61
a688b0570b17fed247ceb8c7eb88cb4f	0	0	122
X3e255923b4f551d6fa5d7789cb1a28b4	60	0	0
X5f14ca526a64aef84cf16fec5bd8db56	110	0	0
X1de3eeac4f588968924ca888a0ffb0c8	88	0	0
X6120b6c4bb554bffbe22bb64470a6ff8	55	0	0
X992f9bfb82690670b9b88459b47216b4	825	4	4
ee841f085f220bb92800b2ff4e6228d2	0	0	186
ad1e8703dbd5914faf8bf77d8e87f91a	651	0	434
X9043b5182e77b706cd390cc01e28d458	26	0	0
e89a0ff9e555fc8f8f7cc6da4273897e	0	0	18
ca06ea2444579c0182aceadfa57c0a9b	50	0	0
e68ad7accf53067a4fae0c48920dfd6a	33	0	250
f648694e41eac4de98f282fd5e431479	75	0	0
c781ad9f9d15f325b29fbcfbaa2f26da	0	0	25
X44daf1a7d9ea1cf09a32b0254dc331f1	0	0	151
da954767e334da9d7e79073da729f512	0	0	110
X2d827591434fc08a0735dadf8e27de64	21	0	0
f2e706dcb9135a59892cbd7c639a17ae	71	0	0
X558d3115783f050cfbe9a3cd50f5fcac	16	0	0
a7ed25dca8d338abbc6c26a33717ebdf	62	0	0
ca6a7024f09c8ef8b188f52f2b91bbdc	0	0	98
X2fefed942d5d477c101c38bd4a08dd86	1104	0	0
X521d85ead97dd45231c367b8bae7db8f	87	0	0
X9d553c261539fe88ee4cb776b1958df3	89	0	0
b8d9494dc37d82d7c1e0ec9cba25c83b	32	0	0
X1d0aa01f49af0ab8f5b6a686e476c623	129	0	115
a05168b47f0a412f206b4b3b051d9c1f	0	0	242
X11061ba29d7f85033a99fd851ae2bd64	0	0	18
X41adf64e8e4a3fc4298f82553390c48a	216	0	0
ec3eb3a579a8d42386255a60ce9e7f29	118	0	0
X2bb2f91b7fe860e32b307dcb5f3a4c07	0	0	51
X523d758207909fe0016b7a06d5428fce	965	148	2
ab72077e9d86cd253c0247f56becc46f	0	0	13
X372378eddd896bbedc6f3af055a81b42	1457	0	145
X4bde4508858d05d757897544f4890785	0	0	186
X1508a971652565dd087699b251460da6	870	0	7
c574d4db0db9eca63559942f345d7d01	44	0	0
X4ec64938b9ac5ea2e9dcc04007b16495	20	0	0
e64f79ddfbc35ea797463285aeeec832	316	701	151
b22b764989018baf64aa0a131f43b393	2	0	611
db9d1f3de2b05ba1a77c15cfe53835ee	362	278	0
X93f3279e9531d79c21e4dcc730f19db8	0	796	0
X0150b28b6f24677b7cb92ff4cf8c3f08	47	0	0
X8c6b5f1ca1f2ead08196c91177596eb4	0	0	45
c21fbbda687ee65a571c75e8bee131b2	0	0	16
d2a2b462e01243096aa59851d2d3ffd0	0	0	171
X17e224e83c81eece717fbc78abfe8876	232	0	0
bf9994441101b010fd9d6ac0ca2f4cbf	30	0	0
bc3c1c610b8f2a75a02c3614631eac63	76	0	0
b1d45c860186bf0e8dec177fec171de7	32	0	0
bf70141fd208d2e37a19cd1f8b9cc408	0	19	0
fb5e7e2a14169997d29ff38b23115c66	16	0	0
X5f252649a68f0327ecf1cca3ff97e2be	0	0	11
X5f3db1e799f6fe2c036650889b9682d4	0	0	10
X5ac5ae1fd34d9ae8e992d9839d4a7654	0	0	105
X50e193706bf4eee55a930b3ebfd25200	0	0	23
X826b4bac6f1db082a1e62043753406f3	14250	3595	15784
X99f469937a584ab7eaec909ac9eedef4	0	0	177
a6bac52b1cec4b7b59127afd02c39980	15	0	0
X2ab080452062207ab4112fe5f09a5d1b	38	0	0
X7916de3f9f629beb91ff4e98db7e462c	10	0	0
d2bb1440d7d81f654a10bb262fe7f095	671	123	141
f82ca175c20d268cee129f751a879fa2	233	0	0
X6829aef2b98e902086a433f44bcf4688	28	0	0
b0e5fa2f7c83b039ad466c475beb5ad1	2424	274	1803
ddde3f0cc391b6d95bf3b4e94cc2ba13	0	0	36
X1bd670f2bb562c679aea1237aaf1890d	245	0	0
X5270dc0f3301ee9c9c9b8a1dd7349549	165	2	0
X665409288ac0f35bbd4282d03c9bf963	291	177	820
X5717936198b3cc933f99b94b9893d556	23	0	128
X7fab4e75af63f5277a2edd1eff41d19f	130	0	0
X997698e5c9811723352390890c3dea22	213	0	783
X9f09b68caac3aada5a37781a534fbc91	2190	474	2229
X308fab9377ceb40c4b6668db70482a14	0	72	0
acad24abe9717017f755dc70318ed9d5	0	0	138
d0e9fdc74ca43e146a616511eee57ca0	0	94	0
c1170ef0e0ecc863b25fca90248eafaa	129	0	0
dde71ff5ede731caa01d6b3ad4fbf8bd	37	0	0
a86f784f9ceca267e66f4606adba9a09	29	0	0
aa0fad7bfef3ceaeecb47aed728eda59	14	0	0
X757773e1dda4ced65c524a9dfcc875c4	0	0	36
bf4f9fd8f8be00b5dda723ff275ac6a0	24	0	0
c2b5dfda04542f9cf0ea795efc087fad	9	0	764
X130897e044ad3aba4ae2334dacfc457f	169	0	0
X8c391eed7ee8f614d1093774ee5e319e	118	0	0
f81e960944dab848c9c548ec4863333b	0	0	28
X4595beab76cf9c171d91537713592174	107	0	0
X6937c73a4004741769706d6b6d2cde6f	30	0	0
X8c49cd6f7efa98b9eb56f5e42b069730	639	0	493
ac920cb4c66bb832b607d6fcced138e3	565	2	0
ee987ca2af1127a87fae75de2a32022d	144	0	0
X957530c5ca789031cbc587a907f72b83	0	0	76
X011ae56f3d4e2c36559004c3c1ef112f	141	0	0
bc88c6c43cdc8c80493d4daeef253bbf	56	0	0
X5aede68d101eff45fb423a7323a0b440	0	0	60
X9796fe9b8672f12bc76952d6a174ce65	39	0	0
X9ff51120479ceafade4b06c4285d54bb	0	0	97
X4ab3fada21a2e34e97cabb27dcf97e4a	136	0	0
X5f483e34f9cbc794ace2457552775f8c	0	0	19
X2e10f039f7310bbc3a19cc73ab738a3e	8168	1903	6299
ccfbf63c259d02255bb27e9a34735170	0	0	165
X7c40086e09c4dcaed95a588535ee8c53	0	0	102
X59e76216e11d91fed661fa6e2bf2a7a0	1	0	203
X605084cb179285153d71113eec761f10	87	0	0
db56ec3c9824dd6454a1eb91ce06501e	71	0	182
X909293eff6c42ba87cd316646e5b60d7	1369	458	983
X28ae2f232cd3d7bb6fc97516e611fc85	0	0	118
X70f441bfb2643ec342cb5e88fb6406c9	126	0	0
X8a75893d73ebd30b6cea482b076ccb28	11	0	0
dc7bfc3f07b962552c2df4f97c5094d0	148	0	49
c6c2df6706b98165c3580ef156877a6c	18	0	86
X64d344ab6dbca2c9ed051fbdc0999327	0	0	56
b542753c5a45bc19d17451d7a5945e4e	12	0	0
X56a4e400f26ec1b0afef199948037725	605	409	585
a5fc9b03b050415461bfd9ab5edddf68	29	0	0
d42e1ec430c978c1d2ae7c3a11d657b9	0	0	15
c9c7e0b119836edf5cfb8f5d04dd1d66	13	0	0
X66c4a3a993effbf109f79642f111ef80	24	0	0
X7dd27ba8bd652652fe9dee7bebef3b0c	0	0	38
e6e478ba0b68684b08fb39657d2e8412	125	62	55
X1cd55ddfe0134624ce06c2612a136641	5	0	12
ac2442fc94cd916213331505e388ef45	0	56	0
X14ba54d5dba8c7d9ed2261ec569827ae	14	0	0
c75ab5b1d97357c9b91f9ea278221cfd	501	23	401
a90dbfea9c6b67be11d28ecd3793478f	32	0	0
b3377146dc0c6928152d45d95ce83a9d	147	0	0
X273238216896b476ba004d57cc4af505	22	0	111
X358d91e2c09ed2339c3300408471c9a1	46	0	0
X6d36bc6ca6d1d7db7d0eb504c2fe2399	10	0	0
X34e151769593fa5767203e61a5549f19	28	0	374
X96ced7b88e791e27152e84c100a25706	324	0	117
X88b02d65968ff12a93e3d0881e174ed6	0	14	0
d60afd0c450a55fac866fac91f83c8b0	100	0	0
X4cb2003e55f9125307dba70085573ec7	0	0	37
beab781b30b57c3c235391825b0e3082	0	0	20
eacfa546a998d8602ed2ef93d5dbb928	0	0	30
X6c94bebdae895f59d0e6cd0940d56671	0	0	96
X6c7af0945d86e41a6c5d4d58f59c8cc1	48	0	0
X7918f37260f85e5fcb128402fe645964	217	0	0
edacc2a6853c95059c687f2bf9b1cb5f	0	0	43
ad59de0d2b22cc58e4cd6977977031fa	0	0	27
X26dfd48ea830236df70148e295829c3b	14	0	0
X188a7e71a38c7b8f4880ef0fb526a186	63	144	153
X1e4e668b36263477e050c7482072f170	144	0	0
c4491ff45bcf9d4d615475ef17142894	0	0	152
X449debb3d5bbf88e47afaf00c171ca96	121	0	0
X07a4378ba29e65121dcd1268adf8c044	0	0	14
ba663a9f9d9b75e4dea1d749a1524c2c	218	0	348
f36b60197fddff28486119f8abb127ff	85	0	0
X24c224ac5d39be147e0c64d51626187e	15	0	0
e3f257ba4c438a27fd0455fa560fec30	56	0	0
de93643920cd60a997827e2e9b6cde14	107	0	3
X0381f277758276290f0c18dfa53950b3	31	0	329
X3ba0a06241e776f9d29e7d50bf7db34f	199	0	0
a3c5fca7c1de0116782a3a0774a03d26	83	0	0
X90cf3f7bf04ac15e8123bf5aa5697e84	0	0	57
X6754b673435759217cb35a3cf2e06946	0	0	71
f70eebfccb6405571b3c84029a2a6cbd	143	0	0
X8735a5bac40f51a46aab45df3517f52e	2	0	19
X8cda2ecd8f74ef0b4307e1cbf523ba6b	233	0	0
X44baf254388d01d717352e7b9de53db6	0	0	105
X21fe6bdf3e43f4d1baaa9238cfc3462c	0	155	0
X64c09177b0285bfa9ae7abd92fd80cd1	4032	334	3199
a31f47eafb89a0c2811ab569e51c3c06	0	0	211
dc8b3769d076dc14276425bae9ab72b4	0	0	217
X5b923e3e0ec3387512a551d890121549	121	0	0
X82880e1af4fb12f174fa46286edf4856	0	0	32
X307bd0fca439260230cde82704c9c74f	0	0	11
X1a95af4fcdd7d9f6723451cba56a647a	556	181	1112
ce9a283b744314df36a679d4414ac168	391	55	132
X1598695d85da001f6d744c5e89cebe26	639	0	354
X5ea0dd846bc0c135b8399f5957c4e69a	16	0	0
X9266ecfccd49519c291e52a758656f3a	193	0	0
X00eb46e3ff9741f544ccbfe4deedae7a	140	0	0
d3296edfbb1c4ad871ee6f4396bef171	1	0	194
c6bf42edcb30e1299c7a35bf8ddd9cae	0	0	81
X56705989a7cc60e75a8426d350e3d582	3192	0	3920
X3456d4f78e7d4592ebce28b90dbcee24	142	0	0
X6adcbb3052f6531826cde62091b095c6	189	0	0
X2262b5d6decc0a10179b3c4a0cddff40	0	0	27
X75963c7e0df705c5570aee6645f6c070	18	0	0
X1adbfd74f3cbf17ac65928427c791b29	0	0	135
d435a895e25010a6ce56d893b4d9bc7f	435	0	0
X52137694e58d92a029be2665b21ac6ce	28	0	0
X9d1c43c73295037c742391be488475ef	433	4	387
X833ca3bb07c80475eb1cc0fb63b30baf	194	0	350
ec6e1d8f6c4020e579e4c16a75ffe34d	52	0	0
cfb2f9f58c612d06f4551ee80adae135	84	0	0
a7724bab5b409733849d97b5a99e2b7e	168	68	0
c355875bc91908a75f124a3131e056f0	42	0	0
X9e86175fb02332763910750553f6ddd3	17	0	0
X684be9396f809ba23d6eef832086e0dc	0	0	13
X1ee615c68b6ad61fb5a54b71d1c1af21	27903	8300	29289
X9583e099e0115506bec951638e6a98f0	140	0	0
X84d5f85aa7f912854fa43f3dada8a3db	33	0	0
X56456aadd998865146c40d161eea1669	0	0	28
e943ea698aa9641b90e36b9ca31177e2	26	0	0
f2576177eef47c3aa64d8405e95acf68	0	0	126
d365ad036b1d0c9b7c31efb7d46f9bc3	0	0	91
X2f9d6edaeaf0d2286d9e591066ccf69c	26	0	0
X2c5c48f133468142c1655d29813ede60	68	0	0
d92982beee4c41dc3831b88168a929a1	0	0	123
X6a4ce157285ea8beba7c2b816be4331b	0	0	45
c5374b9303ca7eca2b9ffb62a9718943	49	0	30
X92818cdcfc2391743193f3f675ddcc91	0	0	55
cd3a0977a282420985e29982115d5389	0	0	83
X9ed98bcfffa8f4b479b11aa779dc171d	1	101	0
X9a0eb5eda4e5062e99f976298033e7f4	0	0	63
X8c225207f99925b5133a1caa00611637	165	0	0
X33f0195f03246104fbd9cd17fe1c130b	0	12	0
X370c31448f8c86c185ea540306e44044	0	0	69
fb7500e862f1cc9a51dc55ae570dc1bb	0	0	52
ec117342d3af05acd6a86b5c6f8fe71a	54	0	0
X519f0e6816775867b7194b512b8cca51	13	0	0
ef9ddb344363b48325eadabba0b0c934	33	0	0
fe3f1c2e47c911873a9ca319d3289990	65	0	0
e28bb5324d5baa18a7349d96347b6111	0	0	23
X8a8e43ea7cc389b97e9b4a8fe8f61377	1850	102	1077
X58854ca835b7fb3d421d0235e0f9a301	0	0	74
fdfe21be3f659ba96ac2b250744c4215	0	0	451
X4ce781ffb908a5e0dd9670f1cac3af4b	0	0	151
f296a5df038b48d8a6107431f85518e8	12	0	0
X5825fa8e873af4e26ae5cda594eae139	3646	0	1520
d8e6ba75bb059596405d14c59d2c6579	0	0	200
c65af826c7c6fe337e8b71d384ffb476	44	0	0
X5789f755399ef994ac58799b1f17ed71	21	0	0
a97ab97452bed3f96ca12c5571fa5c28	347	0	2
a89e09fc98231256205dd22e2bbb3981	53	0	0
X434f41e5006fb5bca621798464f719bf	2	0	305
X86fc0effb99594f452bd929e3f256a5c	56	0	0
X24b1c0ea0b1d9d45c7ae5e8c8c667ab7	34	0	0
X8c4ae31b8f7ca491fb6a21f70e9f4793	12	0	0
X7e7c08376f2b57f480ba04d7558afcf0	0	0	27
ad428281f8c486890b29cad369d63e78	249	0	0
X0ec252ad2e18a1890dd77aeb6b23c12a	70	0	0
c2c34f94ec582a43e92c1bd3ff3fbdc4	434	0	2
X2830036e599b3afeaa76e87e92867761	128	0	174
X1c282850135a6ec908dbc1c704e4e7ac	11	0	0
X1da7d91c1aaf8c4f81926ea5c6604a6f	2	0	51
a3e0874d93aff8088f85fa9bc998597d	0	0	38
X16ee0b51b47d95dd5d5d9c5c20d08ef5	2	0	172
f3ccc5c4fbbb2098b9f0bcedcded235e	0	0	181
f8c8a6778f6c690734f1979074d838a8	65	0	1247
X6620e35dd8e22ae27cb7ecb38f120dd2	0	0	53
b9f606ec1eea5beb9790c7047e482f3b	0	111	0
X66a190d0df67879eac13e58a7aa41dd4	0	0	155
a850a90ac8b41d3cefdf0ffee1dfa865	0	40	0
X7c1003b25d85359215285991380dca01	4	0	124
X85bc1c35ab69cbf7eb3bfad64f703a6a	0	0	120
e6cd455e8de119f37189c3c71dfe3c6b	39	0	0
f1fef5ff914a62fe413ddad9840c0a13	636	2	1833
X562d1393c44cb7c89b79f883fabc68b8	402	0	201
X2ac2b54e695a0d8f9e507976d351e788	148	0	0
X26ef445db1d7d55d770d2a817925acc4	42	0	0
X490c1111f736470c7a891440b9ae03ba	0	0	90
cf46326a7b488c5679ee47c19bb2e729	70	0	211
X272f64e58370d7046e9323398b3bf550	0	0	157
X8a1f28efa2b5d6b6a8f112d2b559c33e	106	0	0
X4276ef7d235b5d07af103effb62d291d	8	0	65
X2b13ff11a9b60e28ae2c16b695a0256c	0	0	82
X4ad0e6040f68a3e95b1875f48657a132	0	244	0
a066ecf863e90322bdeda9b369df9b4e	27	0	0
X0da74f86deef6c79b62026ebbca77ba3	38467	31	774
X9991ae1395732a3f369ae031ad3d47c7	1690	0	497
X729c2f2eca44043df7277fa325fbecaa	0	0	776
aab7cfc1ad1980cef4a545c43813ac00	76	254	0
X675fb11ff458330a4c670b2a6530d410	386	0	4
bfd36318c1ab9eaf2c00cd9c26df0b14	49	0	0
X4564400328a32cdd8bfb22eed37287c1	33	0	0
X3c613ebe23502c5089acb667cffd4d6a	23	0	0
cf515286a4bc2186d23baa947e21df3c	185	0	0
X164e24477a88d352efeb9437c2888bb7	61	0	0
X155808639922116d56a3c13b52f3cd64	57	0	0
dbc4902c5255d7c057983998d7cd50f8	0	0	23
X53766ee61b8fed4fa5bb3f516c8863f5	0	0	19
X2b8aaedc6b0a4f00263e31acf5fba5d1	0	0	19
f6c5781ae823e021f6f6cd5caee6366b	0	0	36
X35a42c8e38fbfffdfcb5ce604a36c56a	0	0	38
ee3849f56a923aba2a639e2c2530f051	122	0	0
ff19ab6eb249911b1c323a47578f7bd0	34	0	89
b205aea932263c056738823f1612f2fd	0	0	26
X94ccfc066f4ee0b1ce36253a78c05a2a	93	0	0
X349c133c5d517bf07d5772bd54d6a742	56	0	0
X7ca1251f2f3fea75e05b83976c3c104b	2460	460	1910
f3dc8edc23098c9a125a812f3df9bbaa	190	0	0
f49ad0085ac5d507ae82bef4c848c17f	295	0	8
X4f30027e32d4b0ce1188f07fa8894867	37	0	0
X670abde9c61e5d106909c3e282174055	240	0	0
X26c8d4abf8ef32e4b42e9fee2bf94faa	43	0	0
c099429dd5f88b24603452b99631ed9e	441	0	5
X2a827316c40f2aae83bdfe3156a38f3c	155	331	0
eaf013b542b90b640538a1379c9f1a12	32	0	123
X04ead4d281f51cb94ed77087e8897f1d	0	167	0
X6b69323fb6bf20061acc772c8aff5875	0	0	547
X170d9b7820a9999561ecb04b0602e871	0	68	0
X06f4e006ec7afe1c2d9d050c0fdc7c59	0	0	82
cbe082a78526b731950f80dcc46ca0d1	155	0	275
X44b1c9cb41e3961fc797d9c599520c4c	40	0	0
X2b66548d5cb2e285e9a90aa2cbb612b8	133	0	0
ad00d7669d526c12cd6e4226ff59ef61	14	0	0
X514ace800109a967f61fb1e3a8991114	31	0	6
f44c15536b2480a3855f128497d766a2	2	0	181
[truncated: 3,487 more rows]

## Sheet: fig4c
PC1	PC2	Treatment
0.0543286	0.909922	Survivor
2.53873	0.282856	Survivor
-1.33046	0.76524	Survivor
-0.619833	0.618328	Dead
-1.48957	1.05173	Dead
0.49591	1.24433	HIV
-0.547105	-0.984284	Dead
0.0840748	-0.357709	Dead
3.14551	-0.417536	Dead
1.04339	-0.39699	Dead
-0.3238	0.0276923	Dead
-0.338017	0.803308	Dead
-0.851613	0.538445	Survivor
-0.407041	0.449406	Survivor
-0.61312	-0.266917	Dead
-1.36303	-1.63112	Dead
0.228681	-0.771532	Dead
0.477864	0.254016	Survivor
-0.596022	0.255175	Dead
-0.529844	0.508169	Dead
-1.49766	-0.262366	Dead
-0.684913	0.828019	Survivor
2.12381	-0.236601	Survivor
1.45712	0.317067	Survivor
0.857696	0.799577	Survivor
-1.52986	0.60711	Survivor
-1.55534	-0.210052	Dead
-0.0839628	0.589951	Dead
1.18139	0.417584	Survivor
-0.315124	-0.133637	Survivor
1.8455	-0.82277	Dead
-1.46843	-0.26009	Dead
-0.945752	-0.601839	Dead
-0.568633	-0.716317	Survivor
-2.26919	-2.15168	HIV
-1.35699	0.171529	Dead
0.653422	-1.08005	Survivor
-0.489823	0.290118	Survivor
2.24796	-1.05519	Dead
6.92979	1.77578	Dead
4.51804	-3.221	Survivor
-0.476805	0.544921	HIV
-1.35768	-1.40364	Survivor
-0.448621	0.351718	Dead
2.04975	0.00187911	Dead
-0.179455	-5.15581	Dead
0.591168	0.224654	Survivor
-0.64045	-0.437934	Survivor
-0.40044	0.93199	HIV
-1.02684	-0.47344	Dead
-0.92272	0.785525	Survivor
-0.783258	0.155274	Dead
-0.604642	1.40477	Survivor
0.183526	1.10792	Survivor
-0.38271	-0.738309	Dead
2.11454	-1.20403	Dead
-0.212421	-0.0296695	HIV
-1.87064	0.302218	Survivor
1.21726	-1.45732	Survivor
-1.36639	-0.706981	Survivor
0.301096	-0.407809	Survivor
1.53238	0.163676	Survivor
0.10216	-0.534087	Dead
-0.73139	0.918677	Dead
-0.0476463	1.45311	Survivor
-0.898785	0.478505	Survivor
0.58448	1.03654	Survivor
-1.1723	0.206541	Survivor
-1.81095	0.240863	Survivor
-1.00273	-1.36906	Dead
-0.327524	-0.0965338	Dead
-1.37185	0.742924	Survivor
0.458468	0.931553	HIV
-1.1317	-0.280842	Dead
-0.869532	0.796193	Survivor
-1.80457	-1.61069	Survivor
1.81481	-0.982502	Survivor
-0.0500447	-0.968337	Dead
-1.13763	-1.01758	Dead
0.482304	0.718708	Dead
-1.03444	1.03502	Dead
2.36693	1.47558	Survivor
-1.67372	-0.0752371	Survivor
2.39114	0.516203	Survivor
-0.153554	1.02521	Survivor
-0.265402	-1.24627	Dead
-1.88153	-1.00819	Survivor
5.84894	1.36869	Survivor
0.654703	0.689028	Survivor
-0.114479	0.679122	Survivor
-0.0993395	0.494291	Dead
-1.76897	-0.392672	Survivor
1.09004	-0.100965	Survivor
-0.82094	-0.556358	Dead
1.41374	0.0868084	Dead
-1.89676	-1.20897	Dead
-0.943954	1.34969	Dead
-0.666823	-0.0657537	Dead
-2.10483	0.23181	HIV
-0.00411613	0.450573	Dead
-1.74073	-0.734548	Dead
0.350231	-1.97804	Survivor
-1.36623	-1.08595	Survivor
-0.45528	0.445486	Dead
-0.506123	0.0398645	Dead
-0.367701	0.29828	Survivor
0.989142	1.1194	Survivor
-1.31569	0.529406	Survivor
-1.53084	-1.08022	Dead
-0.818486	0.7381	Survivor
0.172618	0.567232	Dead
-0.364231	0.582349	Dead
1.36147	0.488732	Dead
-0.399096	0.855407	Dead
-1.42944	-0.025567	Dead
-0.429247	0.606889	Survivor
-0.144884	-0.02365	Survivor
-1.09684	-0.924141	Survivor
-0.514455	-0.139639	Dead
1.39783	-1.33139	Survivor
3.00161	0.67639	Dead
-0.445622	1.14258	Survivor
-1.3675	-0.796911	Dead
0.841712	0.0900761	Dead
0.9786	0.802321	Dead
-1.94905	-1.25691	HIV
-0.898807	-0.923772	Dead
0.736871	1.21213	Dead
-1.71948	0.776034	Dead
-1.08008	-1.17024	Dead
-0.709879	0.69978	Dead
-0.394854	0.473948	Survivor
1.22873	-1.84975	Survivor
-1.01167	1.02026	Survivor
-1.03644	0.033005	Survivor
0.156	1.00101	Survivor
0.962168	0.794747	Dead
1.70527	0.19911	HIV
-1.17325	-1.23661	Dead
-1.14564	1.02529	Dead
0.46947	-1.06344	Survivor
0.220827	0.987452	Dead
0.350151	-0.661985	Survivor
2.38929	1.01585	Dead
-0.968108	0.562655	Survivor
-1.46634	0.881683	Survivor
-0.631438	0.172483	HIV
3.21766	-2.31035	Dead
0.588948	0.828997	Dead
1.04974	-1.01936	Dead
-1.23879	0.598731	Dead
-1.1047	1.32567	Survivor
-0.299971	0.32348	Survivor
0.371187	0.905449	Dead
0.822531	0.239263	Survivor
0.0141167	0.0212247	Survivor
5.31954	1.26914	Survivor
-1.03638	0.441483	Survivor
-0.69335	-0.775869	HIV
0.104791	-0.0106427	Dead
1.60112	0.336984	Dead
-1.51189	-1.11493	Dead
0.0332957	0.509316	Dead
-1.47752	-0.148167	Survivor
-1.16956	-1.62372	Dead
3.11072	0.880478	HIV
0.311659	0.906221	Survivor
-1.99912	-0.543406	Dead
-0.327352	0.257974	Survivor
0.717236	0.838458	HIV
1.69511	-0.786404	Survivor
5.72969	1.25677	Dead
0.681992	0.0170846	Survivor
2.51004	0.932763	Survivor
0.351409	0.488978	Dead
-0.965748	0.281249	Dead
-0.942813	-0.0428283	Dead
0.00496315	-0.0440944	Dead
0.106514	0.209928	HIV
-0.377788	-1.08117	Dead
-1.03099	-0.95244	Dead
-0.323795	-1.70355	HIV
-0.967895	0.925641	Survivor
-0.21073	0.852589	Survivor
-0.999477	0.3296	Dead
-0.331572	-0.00808062	Dead
4.00821	-4.55207	Dead
2.013	-0.444335	Dead
-0.452574	0.315362	Survivor
-1.23298	0.532564	Survivor
-1.28449	0.150716	Dead
0.339046	0.0865289	Survivor
0.10427	-0.922529	Survivor
0.542704	0.0605845	HIV
0.785847	-0.906875	Survivor
-0.735099	0.776708	Dead
0.431367	0.540772	Survivor
-0.902927	0.905004	Survivor
-0.309692	0.883187	Survivor
-0.520662	0.344333	Dead
-0.738906	-0.458003	Survivor
-0.841136	0.371064	HIV
-0.871083	0.748087	Survivor
-1.22532	0.437749	Survivor
0.0802962	0.101425	Dead
2.63048	-3.36688	Survivor
0.83	-0.889016	HIV
-0.169182	0.399733	Survivor
1.15657	0.866541	Dead
-0.329641	0.949731	Survivor
1.08586	0.574566	Dead
-0.861041	0.466047	Survivor
-1.35572	0.288776	Survivor
0.0890644	-1.19017	Dead
-0.350853	0.317966	Survivor
-0.161116	0.146095	Dead
-0.659797	0.756832	Dead
-0.690672	-1.17368	Dead
1.77337	-2.15374	Dead
0.401199	0.95022	Survivor
-1.19308	0.588598	Dead
-0.958333	0.675895	Survivor
1.6538	-0.974855	Dead
-1.75907	0.238232	Survivor
-0.868248	0.82765	HIV
1.17247	1.1427	Survivor
-0.551705	-0.524803	Survivor
1.27564	0.97296	Dead
1.16445	0.258176	Survivor
1.94054	-1.27966	Dead
-0.722116	1.15421	Dead
1.32296	0.545972	Dead
0.184858	0.262029	Dead
-0.376696	-1.56729	Dead
-1.87819	-1.89963	HIV

## Sheet: fig5
baseMean	log2FoldChange	lfcSE	stat	pvalue	padj	Kingdom	Phylum	Class	Order	Family	Genus	unique	Comp
13.9127	-23.3846	2.01594	-11.5998	4.12869e-31	1.04869e-28	d__Bacteria	Actinomycetota	Acidimicrobiia	Acidimicrobiales	Acidimicrobiaceae	Acidiferrimicrobium	Acidiferrimicrobium	Early_death_vs_Survivor
19.9027	-10.2846	1.89456	-5.42849	5.68327e-08	7.21775e-06	d__Bacteria	Actinomycetota	Actinobacteria	Mycobacteriales	Corynebacteriaceae	Lawsonella	Lawsonella	Early_death_vs_Survivor
238.669	5.26146	1.26869	4.14715	3.36634e-05	0.00285017	d__Bacteria	Actinomycetota	Actinobacteria	Mycobacteriales	Mycobacteriaceae	Mycobacterium	Mycobacterium	Early_death_vs_Survivor
238.669	4.43238	1.06385	4.16638	3.09474e-05	0.00786064	d__Bacteria	Actinomycetota	Actinobacteria	Mycobacteriales	Mycobacteriaceae	Mycobacterium	Mycobacterium	Late_death_vs_Survivor
131.764	4.77842	0.937964	5.09446	3.49729e-07	8.63831e-05	d__Bacteria	Actinomycetota	Actinobacteria	Mycobacteriales	Mycobacteriaceae	Mycobacterium	Mycobacterium	Dead_vs_Survivor

## Sheet: fig7
Sample	Mycobacterium	earlydeaths	diss.score3	diss.score	surv
KDHTB357	0.00149726	Survived	1	Diss score ≥ 1	Survivors
KDHTB020	0.00676546	Dead	0	Diss score = 0	Deaths
KDHTB627	0.14421	early.death	2	Diss score ≥ 1	Deaths
KDHTB385	0.00157525	Dead	0	Diss score = 0	Deaths
KDHTB477	0.000478698	Survived	2	Diss score ≥ 1	Survivors
KDHTB189	0.298375	early.death	1	Diss score ≥ 1	Deaths
KDHTB153	0.0331381	Dead	3	Diss score ≥ 1	Deaths
KDHTB531	0.00221656	Dead	3	Diss score ≥ 1	Deaths
KDHTB249	0.039035	Dead	2	Diss score ≥ 1	Deaths
KDHTB331	0.000479386	Survived	0	Diss score = 0	Survivors
KDHTB564	0.155048	Dead	3	Diss score ≥ 1	Deaths
KDHTB563	0.29897	Dead	3	Diss score ≥ 1	Deaths
KDHTB530	0.0143409	Survived	3	Diss score ≥ 1	Survivors
KDHTB492	0.0118354	early.death	1	Diss score ≥ 1	Deaths
KDHTB388	0.00470943	Survived	0	Diss score = 0	Survivors
KDHTB461	0.18488	early.death	3	Diss score ≥ 1	Deaths
KDHTB661	0.0679166	early.death	1	Diss score ≥ 1	Deaths
KDHTB389	0.0133209	Survived	3	Diss score ≥ 1	Survivors
KDHTB364	0.725396	early.death	3	Diss score ≥ 1	Deaths
KDHTB511	0.00691364	Survived	0	Diss score = 0	Survivors
KDHTB002	0.317718	Dead	2	Diss score ≥ 1	Deaths
KDHTB463	0.00159744	Survived	0	Diss score = 0	Survivors
KDHTB150	0.06258	Survived	1	Diss score ≥ 1	Survivors
KDHTB017	0.00128041	Survived	1	Diss score ≥ 1	Survivors
KDHTB236	0.000359745	Survived	1	Diss score ≥ 1	Survivors
KDHTB204	0.000234219	Dead	1	Diss score ≥ 1	Deaths
KDHTB375	0.33384	early.death	3	Diss score ≥ 1	Deaths
KDHTB572	0.000227816	Dead	2	Diss score ≥ 1	Deaths
KDHTB402	0.0312468	Dead	3	Diss score ≥ 1	Deaths
KDHTB456	0.000286862	Survived	1	Diss score ≥ 1	Survivors
KDHTB615	0.000182732	Survived	0	Diss score = 0	Survivors
KDHTB418	0.0724191	early.death	3	Diss score ≥ 1	Deaths
KDHTB576	0.000199362	early.death	0	Diss score = 0	Deaths
KDHTB285	0.049143	Dead	3	Diss score ≥ 1	Deaths
KDHTB374	0.000282725	Survived	0	Diss score = 0	Survivors
KDHTB598	0.000676361	early.death	2	Diss score ≥ 1	Deaths
KDHTB483	0.000403063	early.death	0	Diss score = 0	Deaths
KDHTB573	0.000234714	Survived	1	Diss score ≥ 1	Survivors
KDHTB540	0.0101435	Dead	2	Diss score ≥ 1	Deaths
KDHTB577	0.00395928	Survived	0	Diss score = 0	Survivors
KDHTB660	0.000549073	Dead	1	Diss score ≥ 1	Deaths
KDHTB351	0.00149309	Survived	2	Diss score ≥ 1	Survivors
KDHTB283	0.0891691	early.death	1	Diss score ≥ 1	Deaths
KDHTB594	0.000327726	Survived	1	Diss score ≥ 1	Survivors
KDHTB041	0.0265463	early.death	1	Diss score ≥ 1	Deaths
KDHTB539	0.000609979	Survived	2	Diss score ≥ 1	Survivors
KDHTB602	0.000329128	Survived	0	Diss score = 0	Survivors
KDHTB656	0.123808	early.death	3	Diss score ≥ 1	Deaths
KDHTB653	0.000299536	Survived	0	Diss score = 0	Survivors
KDHTB279	0.0321743	Dead	2	Diss score ≥ 1	Deaths
KDHTB146	0.103352	early.death	1	Diss score ≥ 1	Deaths
KDHTB648	0.000227661	Survived	1	Diss score ≥ 1	Survivors
KDHTB304	0.0650879	Survived	3	Diss score ≥ 1	Survivors
KDHTB519	0.0354757	Survived	2	Diss score ≥ 1	Survivors
KDHTB055	0.333333	Dead	3	Diss score ≥ 1	Deaths
KDHTB675	0.000750075	Dead	1	Diss score ≥ 1	Deaths
KDHTB444	0.00114416	early.death	2	Diss score ≥ 1	Deaths
KDHTB460	0.005689	Dead	1	Diss score ≥ 1	Deaths
KDHTB549	0.000378896	Dead	0	Diss score = 0	Deaths
KDHTB667	0.00982211	Survived	0	Diss score = 0	Survivors
KDHTB630	0.710617	Dead	2	Diss score ≥ 1	Deaths
KDHTB668	0.00059609	Survived	1	Diss score ≥ 1	Survivors
KDHTB198	0.000453858	early.death	0	Diss score = 0	Deaths

## Sheet: fig8
Score	Class	diss.score3	Mycobacterium
5.55251	Survivors	1	0
1.66435	Survivors	1	0.00149726
1.54847	Survivors	0	0
8.12664	Death	3	0
0.51099	Death	1	0
0	OPD controls		0.000783085
0	Death	0	0
108.834	Death	1	0
11.4349	Death		0
0.386813	Death	0	0.00676546
0.51099	Death	2	0.14421
1.35426	Death	0	0.00157525
27.8125	Survivors	2	0
12.9605	Survivors	2	0.000478698
98.3698	Death	1	0.298375
6.20435	Death	2	0
1.96681	Death		0
1.91582	Survivors	0	0
21.1769	Death	3	0.0331381
9.9553	Death	2	0
9.77862	Death	2	0
7.37538	Survivors	1	0
11.397	Survivors	0	0
8.07637	Survivors	1	0
1.42636	Survivors	2	0
1.12672	Survivors	0	0
2.65564	Death	0	0
9.36924	Death	3	0.00221656
6.54935	Survivors		0.00369105
1.58852	Survivors	0	0
18.4794	Death	1	0
5.24713	Death	1	0
19.1598	Death	1	0
12.7647	Survivors	0	0
0	OPD controls		0
19.4924	Death	2	0.039035
6.1002	Survivors	0	0.000479386
5.71449	Survivors	2	0
12.9089	Death	1	0
31.7847	Death	3	0.155048
28.9587	Survivors	3	0
0.341854	OPD controls		0.00110236
15.5824	Survivors	1	0
8.03331	Death	3	0.29897
5.9985	Death		0
1.40694	Death	0	0
8.61275	Survivors	3	0.0143409
1.30319	Survivors	0	0
0	OPD controls		0
12.9931	Death	1	0.0118354
1.56022	Survivors	0	0
3.11172	Death	2	0
7.50098	Survivors	3	0
4.11915	Survivors	0	0.00470943
39.0673	Death	3	0.18488
25.0405	Death	1	0.0679166
0.429222	OPD controls		0
24.0473	Survivors	3	0
7.46592	Survivors	3	0.0133209
2.35983	Survivors	0	0
7.75788	Survivors		0
4.27256	Survivors		0
96.4802	Death	3	0.725396
2.81227	Death	0	0
0.51099	Survivors	0	0
3.72297	Survivors	0	0
5.47437	Survivors	0	0
0.403367	Survivors	0	0.00691364
2.75879	Survivors	0	0
0.51099	Death		0
16.4111	Death	2	0.317718
1.87623	Survivors	0	0.00159744
0	OPD controls		0.0308519
42.5645	Death	3	0
13.4109	Survivors	1	0
9.69985	Survivors		0
0.51099	Survivors	1	0
1.44474	Death	3	0
0.51099	Death	1	0
10.4904	Death	2	0
7.66471	Death	1	0
1.02614	Survivors	2	0
2.00597	Survivors	2	0
16.077	Survivors		0
16.2957	Survivors	3	0
8.68214	Death	2	0
4.38105	Survivors	1	0
19.1292	Survivors	2	0
4.62013	Survivors	1	0.06258
1.31264	Survivors	1	0.00128041
366.294	Death	3	0
1.33208	Survivors	1	0.000359745
12.4546	Survivors	3	0
11.1811	Death	1	0.000234219
62.819	Death	3	0.33384
8.80582	Death	2	0.000227816
43.7177	Death	3	0.0312468
14.9537	Death	1	0
0.489314	OPD controls		0
14.8444	Death		0
24.677	Death	1	0
10.3332	Survivors	1	0.000286862
21.9902	Survivors	3	0
13.0805	Death	2	0
26.0256	Death	2	0
2.49502	Survivors	0	0
3.59754	Survivors	0	0.000182732
15.399	Survivors	3	0
24.5948	Death	3	0.0724191
6.55316	Survivors	1	0
1.34883	Death	0	0.000199362
9.69953	Death	3	0.049143
36.6495	Death	1	0
8.27232	Death	2	0
11.3288	Death	2	0
2.91585	Survivors	0	0
3.44796	Survivors	0	0.000282725
43.7311	Survivors	2	0
10.3914	Death	3	0
2.85351	Survivors	0	0
7.28466	Death	2	0
2.69381	Survivors		0.000237248
0.51099	Death	2	0.000676361
13.5316	Death	3	0
0.383353	Death		0.00024325
0	OPD controls		0
5.22744	Death	0	0.000403063
8.83873	Death	3	0
0	Death		0
8.48356	Death	1	0
0.51099	Death	0	0
0.51099	Survivors	1	0.000234714
9.95246	Survivors	1	0
2.65989	Survivors	2	0
8.20691	Survivors	2	0
0.518288	Survivors	0	0
0.82706	Death	0	0
0	OPD controls		0.000271186
15.0836	Death	3	0
7.63719	Death	2	0.0101435
5.46078	Survivors	0	0.00395928
30.4728	Death	2	0
3.55858	Survivors	1	0
36.232	Death	2	0
1.75417	Survivors	1	0
9.90105	Survivors	1	0
0	OPD controls		0.000727273
15.2883	Death	3	0
65.9805	Death	1	0.000549073
5.85704	Death	0	0
6.91756	Death	0	0
7.30613	Survivors	1	0
13.0007	Survivors	2	0.00149309
46.9599	Death	1	0.0891691
4.21608	Survivors	0	0
0.486502	Survivors	1	0.000327726
5.52746	Survivors	1	0
1.00175	Survivors	0	0
1.66955	OPD controls		0
12.4139	Death	1	0
0	Death	1	0.0265463
0.51099	Death		0
6.43564	Death		0
1.43013	Survivors		0.0168238
4.04009	Death	0	0
0	OPD controls		0
4.89861	Survivors	2	0.000609979
6.0333	Death	1	0
9.57373	Survivors	3	0
0	OPD controls		0
2.50724	Survivors	0	0.000329128
81.6987	Death	3	0.123808
12.1409	Survivors	2	0
30.8709	Survivors	0	0.000299536
0.51099	Death	0	0
13.5678	Death	1	0
14.8871	Death	3	0
26.4834	Death	1	0
0	OPD controls		0
5.5238	Death	2	0
40.0942	Death	2	0.0321743
0.535576	OPD controls		0
0.398893	Survivors	0	0
0.369514	Survivors	0	0
4.80644	Death	1	0
18.864	Death		0
3.36537	Death	1	0
0.51099	Death	1	0
0.46639	Survivors	0	0
0.51099	Survivors		0
18.2288	Death	1	0.103352
12.0078	Survivors	3	0
1.33126	Survivors	2	0
0	OPD controls		0
0	Survivors	0	0
5.48748	Death	1	0
4.5661	Survivors	0	0
1.48235	Survivors	1	0.000227661
7.55813	Survivors	3	0.0650879
9.47115	Death	1	0
7.13136	Survivors	0	0
0	OPD controls		0
3.32647	Survivors	1	0
24.5618	Survivors	2	0.0354757
6.17432	Death	3	0.333333
17.4529	Survivors	0	0
0	OPD controls		0.000796813
2.70802	Survivors	2	0
0.51099	Death	1	0.000750075
2.1545	Survivors	0	0
13.3055	Death	2	0.00114416
5.4432	Survivors	1	0
10.6234	Survivors		0
6.05739	Death	1	0.005689
31.5904	Survivors	1	0
3.71747	Death		0.0625846
1.21675	Death	0	0.000378896
7.20486	Death	1	0
195.41	Death	2	0
2.04248	Survivors	0	0.00982211
13.8674	Death	1	0
0.988136	Survivors	0	0
55.7064	Death	2	0.710617
6.02414	Survivors	2	0
0	OPD controls		0
0.51099	Survivors	1	0.00059609
4.10947	Survivors	0	0
10.8669	Death	3	0
0.51099	Survivors	1	0
0.51099	Death	3	0
14.3893	Death	2	0
3.25024	Death	1	0
7.18455	Death	0	0.000453858
0.51099	Death	0	0
0	OPD controls		0

## Sheet: sup2
baseMean	log2FoldChange	lfcSE	stat	pvalue	padj	Kingdom	Phylum	Class	Order	Family	Genus	unique	Comp
24.4704	8.37627	1.83883	4.55521	5.23333e-06	0.000260358	d__Bacteria	Actinomycetota	Acidimicrobiia	Microtrichales	Ilumatobacteraceae	CL500-29_marine_group	CL500-29_marine_group	Survivor_vs_HIV
35.3741	22.6202	2.45184	9.22584	2.81352e-20	1.8663e-18	d__Bacteria	Actinomycetota	Actinobacteria	Mycobacteriales	Corynebacteriaceae	Lawsonella	Lawsonella	Survivor_vs_HIV
21.5871	23.0624	2.15595	10.6971	1.04985e-26	1.0446e-24	d__Bacteria	Bacillota	Bacilli	Lactobacillales	Carnobacteriaceae	Trichococcus	Trichococcus	Survivor_vs_HIV
14.2188	7.11609	2.19641	3.23987	0.00119584	0.039662	d__Bacteria	Bacteroidota	Bacteroidia	Flavobacteriales	Weeksellaceae	Cloacibacterium	Cloacibacterium	Survivor_vs_HIV
30.7377	23.6911	2.10299	11.2654	1.94373e-29	3.86802e-27	d__Bacteria	Pseudomonadota	Alphaproteobacteria	Hyphomicrobiales	Hyphomicrobiaceae	Hyphomicrobium	Hyphomicrobium	Survivor_vs_HIV
15.2554	7.32514	2.19438	3.33813	0.000843441	0.033569	d__Bacteria	Pseudomonadota	Gammaproteobacteria	Burkholderiales	Comamonadaceae	Aquabacterium	Aquabacterium	Survivor_vs_HIV
16.0397	7.79676	2.42104	3.22042	0.00128004	0.0405956	d__Bacteria	Actinomycetota	Acidimicrobiia	Microtrichales	Ilumatobacteraceae	CL500-29_marine_group	CL500-29_marine_group	Death_vs_HIV
167.235	6.81096	1.67271	4.0718	4.66516e-05	0.00172611	d__Bacteria	Actinomycetota	Actinobacteria	Mycobacteriales	Mycobacteriaceae	Mycobacterium	Mycobacterium	Death_vs_HIV
21.3587	23.9771	2.16851	11.0569	2.02924e-28	4.50491e-26	d__Bacteria	Bacillota	Bacilli	Lactobacillales	Carnobacteriaceae	Trichococcus	Trichococcus	Death_vs_HIV
15.1418	22.7488	2.47555	9.18939	3.95074e-20	2.92355e-18	d__Bacteria	Bacillota	Bacilli	Lactobacillales	Streptococcaceae	Streptococcus	Streptococcus	Death_vs_HIV
30.5789	9.87171	1.75363	5.62929	1.8095e-08	8.03419e-07	d__Bacteria	Pseudomonadota	Alphaproteobacteria	Hyphomicrobiales	Hyphomicrobiaceae	Hyphomicrobium	Hyphomicrobium	Death_vs_HIV
14.2087	22.9778	2.74253	8.3783	5.36984e-17	2.98026e-15	d__Bacteria	Pseudomonadota	Alphaproteobacteria	Rhodobacterales	Paracoccaceae	Paracoccus	Paracoccus	Death_vs_HIV
15.6586	23.5597	2.25556	10.4452	1.54163e-25	1.71121e-23	d__Bacteria	Pseudomonadota	Gammaproteobacteria	Burkholderiales	Burkholderiaceae	Ralstonia	Ralstonia	Death_vs_HIV
