# Supplementary material for: Microbial product translocation and mortality in adults hospitalised with HIV-associated tuberculosis: a prospective observational cohort study
Source: Research Square preprint supplement (doi:10.21203/rs.3.rs-9856875/v1), 2026-06-01
Supplement: Supplementary file 2 [file 2e6b095118c0276ecc80300a.xlsx]

## Sheet: Figure 1
Figure 1
		Died	LTFU	OPD.control	Survived
	Outcome	124	9	69	443
	MTL data	71	5	32	265

## Sheet: Figure 2
Figure 2
		survival 12weeks	Min	Q1	Median	Mean	Q3	Max
	16s rDNA	Died	98.9905	2332.59	4078.35	5460.3	7834.27	20994.1
		Survived	378.718	2392.95	3783.42	5232.12	6147.5	21608.9
	LPS	Died	0	0.0101568	0.157165	0.169424	0.240785	0.892912
		Survived	0	0	0.141814	0.199097	0.232206	3.24612
	sCD14	Died	1486133	4.7634e+06	6211360	7.02397e+06	8111271	20785794
		Survived	2197548	4521518	5539218	6.06519e+06	6949930	16000000
	LBP	Died	22000	141202	185020	194841	236655	471260
		Survived	20796.5	142970	188110	205796	251187	1176640
	EndoCAB	Died	1.6	13.5	26.6	34.7803	43.8	197.2
		Survived	2.5	20	35.7	58.9977	61.7	1800.1
	TFF3	Died	7459.5	16401.4	25058.2	46858	71726.2	215573
		Survived	595.75	10087	13518.5	18958.9	20543.7	191115
	IFABP	Died	4.686	58.215	234.118	406.009	564.886	2830.27
		Survived	0.312	78.924	190.854	380.569	392.096	6257.98

## Sheet: Figure 6
Figure 6
		16s rDNA	Min	Q1	Median	Mean	Q3	Max
	Dissemination Score
	0		1050.6	2383.43	3437.73	4867.7	6265.19	16167.2
	1		557.572	2266.95	3661.14	5049.4	6123.87	19677
	2		509.087	2519.42	4172.17	5756.04	8384.01	20990.5
	3		98.9905	2337.9	4709.08	5971.93	7308.39	21608.9
		LPS	Min	Q1	Median	Mean	Q3	Max
	0		0	0	0.120558	0.166674	0.207637	2.91387
	1		0	0	0.166439	0.218541	0.219335	3.08527
	2		0	0	0.142332	0.193499	0.242782	3.24612
	3		0	0.0776656	0.162046	0.208705	0.274613	2.61064
		sCD14	Min	Q1	Median	Mean	Q3	Max
	0		2197548	4269957	4997689	5.55195e+06	6.20289e+06	16000000
	1		1486133	4.62796e+06	5964334	6.3707e+06	7797014	16260219
	2		2776913	4.98103e+06	6.13e+06	6.71289e+06	7.34865e+06	20785794
	3		2700837	5.0985e+06	6.00057e+06	6.70695e+06	7.84518e+06	18326826
		LBP	Min	Q1	Median	Mean	Q3	Max
	0		28803.2	130280	178820	189576	237171	500000
	1		41567	131082	174688	174297	216950	344465
	2		79151	171468	207940	212385	248778	500000
	3		20796.5	157511	245616	243604	308370	1176640
		EndoCAB	Min	Q1	Median	Mean	Q3	Max
	0		2.5	24.75	44.35	70.0655	69.5	1800.1
	1		2.5	18.95	32.4	55.2972	53.85	350
	2		4.1	19.7	29.9	46.7025	55.5	350
	3		1.6	15.05	27.9	36.152	46.25	150.7
		TFF3	Min	Q1	Median	Mean	Q3	Max
	0		595.75	9422.85	12579.6	17298	17518.9	146954
	1		4679.9	11314.5	15485.8	21681.3	20543.7	98496.1
	2		5210.75	11276.5	17321.2	30231.8	29426.8	215573
	3		7459.5	12359.4	19645.1	33330	30402.3	191115
		IFABP	Min	Q1	Median	Mean	Q3	Max
	0		1.122	68.113	208.402	404.711	461.618	6000
	1		7.914	120.672	206.308	495.313	435.156	6257.98
	2		0.312	47	213.728	349.761	425.644	2830.27
	3		13.968	47	154.718	267.988	333.159	1703.05

## Sheet: Figure 7
Figure 7
			MTB		Min	Q1	Median	Mean	Q3	Max
		Dissemination score
		0			0	0	5.06971e-05	0.0011129	0.000267858	0.0155356
		1			0	0	6.85945e-05	0.00687038	0.000485122	0.0990348
		2			0	0	5.0616e-05	0.0280747	0.000383762	0.726458
		3			0	0	6.05267e-05	0.0686437	0.0496696	0.782597
			MTB		Min	Q1	Median	Mean	Q3	Max
				survival 12weeks
		0		Died	0	0	4.49116e-05	0.000854941	0.000200691	0.0148748
		0		Survived	0	0	5.25735e-05	0.00123902	0.000282486	0.0155356
		1		Died	0	0	4.34263e-05	0.0121477	0.000679586	0.0990348
		1		Survived	0	3.15909e-05	0.000110234	0.000273786	0.000474708	0.00127551
		2		Died	0	0	3.99554e-05	0.0443373	0.00037661	0.726458
		2		Survived	0	0	5.80979e-05	0.0069334	0.000363338	0.0957175
		3		Died	0	0	0.000571537	0.0969451	0.146493	0.782597
		3		Survived	0	0	0	0.00638058	0.000125897	0.0782431
